# Supplementary material for: Palladium-catalyzed asymmetric 1,6-addition of diarylphosphines to α,β,γ,δ-unsaturated sulfonic esters: controlling regioselectivity by rational selection of electron-withdrawing groups
Source: Royal Society of Chemistry journal article supplement (doi:10.1039/c3cc46290k), 2013-11-11
Supplement: c3cc46290k.pdf [file c3cc46290k.pdf]

**Palladium-catalyzed asymmetric 1,6-addition of diarylphosphines to  $\alpha,\beta,\gamma,\delta$ -unsaturated sulfonic esters: controlling regioselectivity by rational selection of electron-withdrawing groups**

Junzhu Lu,<sup>‡</sup> Jinxing Ye,<sup>‡</sup> and Wei-Liang Duan\*,<sup>†</sup>

<sup>†</sup> State Key Laboratory of Organometallic Chemistry, Shanghai Institute of Organic Chemistry, Chinese Academy of Sciences, 345 LingLing Road, Shanghai 200032, China

<sup>‡</sup> School of Pharmacy, East China University of Science and Technology, 130 Meilong Road, Shanghai 200237, China

E-mail: wlduan@mail.sioc.ac.cn

**Supporting Information**

**Table of Contents**

|                                                |         |
|------------------------------------------------|---------|
| General Methods                                | S2      |
| Experimental Details and Characterization Data | S2-S19  |
| Reference                                      | S19     |
| NMR Spectra                                    | S20-S55 |
| HPLC Chart                                     | S56-S74 |
| X-Ray Data                                     | S75-S76 |

## General Methods

All air- and moisture-sensitive manipulations were carried out with standard Schlenk techniques under nitrogen or in a glove box under nitrogen.  $^1\text{H}$ ,  $^{13}\text{C}$  and  $^{31}\text{P}$  NMR spectra were recorded on a Varian instrument (300 MHz, 75 MHz and 121 MHz; 400 MHz, 100 MHz and 162 MHz, respectively).  $^1\text{H}$ ,  $^{13}\text{C}$  NMR chemical shifts are reported vs tetramethylsilane signal or residual protio solvent signals.

Toluene and THF were distilled over sodium benzophenone ketyl under nitrogen. Dichloromethane and tert-amyl alcohol was distilled over  $\text{CaH}_2$  under nitrogen.

The pincer-PdOAc catalysts<sup>1</sup>, diarylphosphine<sup>2</sup> and  $\alpha,\beta$ -unsaturated sulfonic esters<sup>3</sup> were synthesized following the literature procedures. All other chemicals and solvents were purchased from commercial company and used as received.

## Experimental Details and Characterization Data

### General Experimental Procedures for Table 2.

Diarylphosphine (0.20 mmol) was added to a solution of (*S,S*)-Pd catalyst (6.7 mg, 10  $\mu\text{mol}$  Pd) and  $\alpha,\beta,\gamma,\delta$ -unsaturated sulfonic ester **1** (0.21 mmol) in toluene (4.0 mL) at  $-60\text{ }^\circ\text{C}$  (realized with a refrigerated bath circulator), then the resulting solution was stirred for 24 h at the same temperature. The reaction was quenched with 30%  $\text{H}_2\text{O}_2$  aqueous solution (0.1 mL) and concentrated under vacuum. The residue was purified by silica gel chromatography with  $\text{CH}_2\text{Cl}_2/\text{MeOH} = 100/1$  to afford the 1,6-adduct.

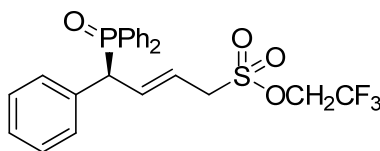

**Entry 1.** White solid. (80.2 mg; 81% yield). The ee was determined on a Daicel Chiralcel OD column with hexane/2-propanol = 70/30, flow = 0.7 mL/min. Retention times: 12.2 min [(*R*)-enantiomer], 14.1 min [(*S*)-enantiomer]. 94% ee.  $[\alpha]_D^{20} = -12.1$

(c 0.500, CH<sub>2</sub>Cl<sub>2</sub>), The absolute configuration was assigned by analogy with Table 2, entry 4.

<sup>1</sup>H NMR (400 MHz, CDCl<sub>3</sub>): δ 7.89-7.83 (m, 2H, Ar), 7.61-7.45 (m, 5H, Ar), 7.40-7.35 (m, 1H, Ar), 7.29-7.18 (m, 7H, Ar), 6.36-6.16 (m, 1H, olefin), 5.58-5.48 (m, 1H, olefin), 4.33-4.21 (m, 3H), 3.89-3.76 (m, 2H, CH<sub>2</sub>S). <sup>13</sup>C NMR (100 MHz, CDCl<sub>3</sub>): δ 136.7 (d, *J*<sub>CP</sub> = 6.4 Hz), 134.5 (d, *J*<sub>CP</sub> = 5.7 Hz), 132.3 (d, *J*<sub>CP</sub> = 2.7 Hz), 131.8 (d, *J*<sub>CP</sub> = 3.0 Hz), 131.6 (d, *J*<sub>CP</sub> = 8.7 Hz), 131.19 (d, *J*<sub>CP</sub> = 8.8 Hz), 131.16 (d, *J*<sub>CP</sub> = 96.1 Hz), 131.0 (d, *J*<sub>CP</sub> = 97.2 Hz), 129.4 (d, *J*<sub>CP</sub> = 5.7 Hz), 128.9 (d, *J*<sub>CP</sub> = 10.3 Hz), 128.85, 128.4 (d, *J*<sub>CP</sub> = 11.8 Hz), 127.7 (d, *J*<sub>CP</sub> = 2.3 Hz), 121.9 (q, *J*<sub>CF</sub> = 277.8 Hz), 119.8 (d, *J*<sub>CP</sub> = 11.0 Hz), 65.1 (q, *J*<sub>CF</sub> = 37.8 Hz), 55.0 (d, *J*<sub>CP</sub> = 1.9 Hz), 51.6 (d, *J*<sub>CP</sub> = 64.5 Hz). <sup>31</sup>P{<sup>1</sup>H} NMR (161 MHz, CDCl<sub>3</sub>): δ 28.2 (s). HRMS (ESI) calcd for C<sub>24</sub>H<sub>23</sub>F<sub>3</sub>O<sub>4</sub>PS (M+H)<sup>+</sup>: 495.1001, found: 495.1002.

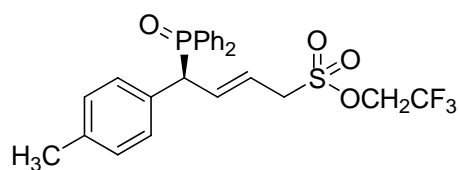

**Entry 2.** White solid. (79.1 mg; 78% yield). The ee was determined on a Daicel Chiralpak AD column with hexane/2-propanol = 90/10, flow = 1.0 mL/min. Retention times: 86.7 min [(*R*)-enantiomer], 98.5 min [(*S*)-enantiomer]. 94% ee. [ $\alpha$ ]<sub>D</sub><sup>20</sup> = -5.2 (c 0.50, CH<sub>2</sub>Cl<sub>2</sub>), The absolute configuration was assigned by analogy with Table 2, entry 4.

<sup>1</sup>H NMR (400 MHz, CDCl<sub>3</sub>): δ 7.86-7.82 (m, 2H, Ar), 7.56-7.48 (m, 5H, Ar), 7.40-7.35 (m, 1H, Ar), 7.31-7.25 (m, 2H, Ar), 7.15 (d, *J* = 7.6 Hz, 2H, Ar), 7.02 (d, *J* = 7.6 Hz, 2H, Ar), 6.36-6.16 (m, 1H, olefin), 5.55-5.46 (m, 1H, olefin), 4.33-4.15 (m, 3H), 3.89-3.75 (m, 2H, CH<sub>2</sub>S), 2.26 (s, 3H, Me). <sup>13</sup>C NMR (100 MHz, CDCl<sub>3</sub>): δ 137.5 (d, *J*<sub>CP</sub> = 2.3 Hz), 137.0 (d, *J*<sub>CP</sub> = 6.0 Hz), 132.2 (d, *J*<sub>CP</sub> = 3.0 Hz), 131.8 (d, *J*<sub>CP</sub> = 2.7 Hz), 131.6 (d, *J*<sub>CP</sub> = 8.8 Hz), 131.4 (d, *J*<sub>CP</sub> = 6.1 Hz), 131.31 (d, *J*<sub>CP</sub> = 89.0 Hz), 131.29 (d, *J*<sub>CP</sub> = 9.1 Hz), 130.21 (d, *J*<sub>CP</sub> = 96.9 Hz), 129.6 (d, *J*<sub>CP</sub> = 1.5 Hz), 129.3 (d, *J*<sub>CP</sub> = 5.7 Hz), 128.9 (d, *J*<sub>CP</sub> = 11.4 Hz), 128.4 (d, *J*<sub>CP</sub> = 11.8 Hz), 121.9 (q, *J*<sub>CF</sub> = 277.7 Hz), 119.6 (d, *J*<sub>CP</sub> = 11.0 Hz), 65.1 (q, *J*<sub>CF</sub> = 38.2 Hz), 55.0 (d, *J*<sub>CP</sub> = 1.9 Hz), 51.2 (d,

$J_{CP} = 64.8$  Hz).  $^{31}\text{P}\{^1\text{H}\}$  NMR (161 MHz,  $\text{CDCl}_3$ ):  $\delta$  28.2 (s). HRMS (ESI) calcd for  $\text{C}_{25}\text{H}_{25}\text{F}_3\text{O}_4\text{PS}$  ( $\text{M}+\text{H}$ ) $^+$ : 509.1158, found: 509.1156.

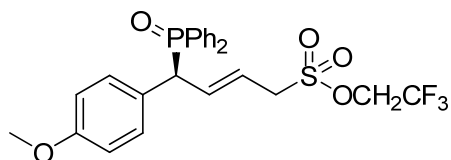

**Entry 3.** White solid. (66.3 mg; 63% yield). The ee was determined on a Daicel Chiralcel OD column with hexane/2-propanol = 85/15, flow = 1.0 mL/min. Retention times: 15.4 min [(*R*)-enantiomer], 26.6 min [(*S*)-enantiomer]. 96% ee.  $[\alpha]_D^{20} = -18.4$  (c 0.50,  $\text{CH}_2\text{Cl}_2$ ). The absolute configuration was assigned by analogy with Table 2, entry 4.

$^1\text{H}$  NMR (400 MHz,  $\text{CDCl}_3$ ):  $\delta$  7.86-7.82 (m, 2H, Ar), 7.56-7.46 (m, 5H, Ar), 7.40-7.35 (m, 1H, Ar), 7.31-7.25 (m, 2H, Ar), 7.15 (dd,  $J = 6.8$  and 1.6 Hz, 2H, Ar), 6.75 (d,  $J = 8.8$  Hz, 2H, Ar), 6.32-6.22 (m, 1H, olefin), 5.55-5.46 (m, 1H, olefin), 4.31-4.15 (m, 3H), 3.87-3.75 (m, 2H,  $\text{CH}_2\text{S}$ ), 3.75 (s, 3H, OMe).  $^{13}\text{C}$  NMR (100 MHz,  $\text{CDCl}_3$ ):  $\delta$  159.0 (d,  $J_{CP} = 2.3$  Hz), 136.8 (d,  $J_{CP} = 6.1$  Hz), 132.2 (d,  $J_{CP} = 2.7$  Hz), 131.8 (d,  $J_{CP} = 3.0$  Hz), 131.6 (d,  $J_{CP} = 8.3$  Hz), 131.21 (d,  $J_{CP} = 9.1$  Hz), 131.18 (d,  $J_{CP} = 99.1$  Hz), 131.0 (d,  $J_{CP} = 96.5$  Hz), 130.5 (d,  $J_{CP} = 5.7$  Hz), 128.9 (d,  $J_{CP} = 11.3$  Hz), 128.4 (d,  $J_{CP} = 11.7$  Hz), 126.5 (d,  $J_{CP} = 6.1$  Hz), 121.9 (q,  $J_{CF} = 278.1$  Hz), 119.6 (d,  $J_{CP} = 11.0$  Hz), 114.3 (d,  $J_{CP} = 1.9$  Hz), 65.1 (q,  $J_{CF} = 37.8$  Hz), 55.2, 54.9 (d,  $J_{CP} = 1.2$  Hz), 50.6 (d,  $J_{CP} = 65.2$  Hz).  $^{31}\text{P}\{^1\text{H}\}$  NMR (161 MHz,  $\text{CDCl}_3$ ):  $\delta$  28.2 (s). HRMS (ESI) calcd for  $\text{C}_{25}\text{H}_{25}\text{F}_3\text{O}_5\text{PS}$  ( $\text{M}+\text{H}$ ) $^+$ : 525.1107, found: 525.1106.

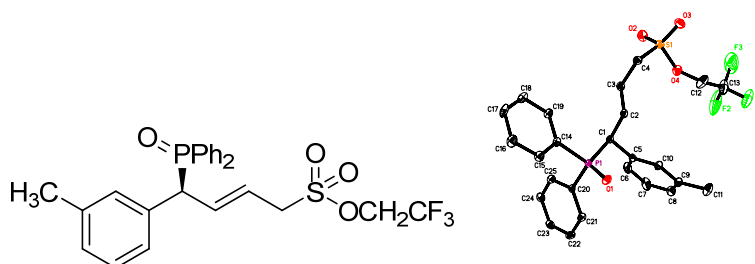

**Entry 4.** White solid. (88.3 mg; 87% yield). The ee was determined on a Daicel Chiralpak AD column with hexane/2-propanol = 80/20, flow = 1.0 mL/min. Retention

times: 18.7 min [(*R*)-enantiomer], 20.8 min [(*S*)-enantiomer]. 93% ee.  $[\alpha]_D^{20} = -11.9$  (c 0.500, CH<sub>2</sub>Cl<sub>2</sub>). The absolute configuration was determined as *S* according to the X-ray crystal diffraction analysis of the product.

<sup>1</sup>H NMR (400 MHz, CDCl<sub>3</sub>): δ 7.87-7.82 (m, 2H, Ar), 7.55-7.46 (m, 5H, Ar), 7.40-7.35 (m, 1H, Ar), 7.31-7.25 (m, 2H, Ar), 7.10-7.00 (m, 3H, Ar), 7.00 (d, *J* = 7.2 Hz, 1H, Ar), 6.35-6.28 (m, 1H, olefin), 5.57-5.48 (m, 1H, olefin), 4.32-4.15 (m, 3H), 3.88-3.75 (m, 2H, CH<sub>2</sub>S), 2.23 (s, 3H, Me). <sup>13</sup>C NMR (100 MHz, CDCl<sub>3</sub>): δ 138.5 (d, *J*<sub>CP</sub> = 1.9 Hz), 136.7 (d, *J*<sub>CP</sub> = 6.3 Hz), 134.3 (d, *J*<sub>CP</sub> = 5.9 Hz), 132.2 (d, *J*<sub>CP</sub> = 3.0 Hz), 131.8 (d, *J*<sub>CP</sub> = 3.0 Hz), 131.6 (d, *J*<sub>CP</sub> = 8.2 Hz), 131.3 (d, *J*<sub>CP</sub> = 9.0 Hz), 131.2 (d, *J*<sub>CP</sub> = 99.1 Hz), 131.0 (d, *J*<sub>CP</sub> = 96.9 Hz), 130.0 (d, *J*<sub>CP</sub> = 5.6 Hz), 128.9 (d, *J*<sub>CP</sub> = 11.5 Hz), 128.7 (d, *J*<sub>CP</sub> = 1.5 Hz), 128.4 (d, *J*<sub>CF</sub> = 2.3 Hz), 128.3 (d, *J*<sub>CP</sub> = 11.9 Hz), 126.4 (d, *J*<sub>CP</sub> = 6.0 Hz), 121.9 (q, *J*<sub>CF</sub> = 278.3 Hz), 119.7 (d, *J*<sub>CP</sub> = 11.2 Hz), 65.1 (q, *J*<sub>CF</sub> = 38.1 Hz), 55.0 (d, *J*<sub>CP</sub> = 1.5 Hz), 51.6 (d, *J*<sub>CP</sub> = 64.3 Hz), 21.4. <sup>31</sup>P{<sup>1</sup>H} NMR (161 MHz, CDCl<sub>3</sub>): δ 28.1 (s). HRMS (ESI) calcd for C<sub>25</sub>H<sub>25</sub>F<sub>3</sub>O<sub>4</sub>PS (M+H)<sup>+</sup>: 509.1158, found: 509.1162.

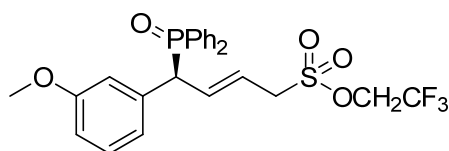

**Entry 5.** White solid. (82.1 mg; 78% yield). The ee was determined on a Daicel Chiralpak AD column with hexane/2-propanol = 80/20, flow = 1.0 mL/min. Retention times: 24.8 min [(*R*)-enantiomer], 30.7 min [(*S*)-enantiomer]. 95% ee. The absolute configuration was assigned by analogy with Table 2, entry 4.

<sup>1</sup>H NMR (400 MHz, CDCl<sub>3</sub>): δ 7.88-7.82 (m, 2H, Ar), 7.55-7.46 (m, 5H, Ar), 7.40-7.35 (m, 1H, Ar), 7.31-7.25 (m, 2H, Ar), 7.13 (t, *J* = 8.0 Hz, 1H, Ar), 6.86-6.79 (m, 2H, Ar), 6.73 (d, *J* = 8.4 Hz, 1H, Ar), 6.35-6.28 (m, 1H, olefin), 5.55-5.48 (m, 1H, olefin), 4.32-4.15 (m, 3H), 3.88-3.75 (m, 2H, CH<sub>2</sub>S), 3.68 (s, 3H, OMe). <sup>13</sup>C NMR (100 MHz, CDCl<sub>3</sub>): δ 159.8 (d, *J*<sub>CP</sub> = 1.6 Hz), 136.6 (d, *J*<sub>CP</sub> = 6.5 Hz), 136.0 (d, *J*<sub>CP</sub> = 5.6 Hz), 132.3 (d, *J*<sub>CP</sub> = 2.6 Hz), 131.9 (d, *J*<sub>CP</sub> = 3.1 Hz), 131.6 (d, *J*<sub>CP</sub> = 8.4 Hz), 131.3 (d, *J*<sub>CP</sub> = 9.1 Hz), 131.2 (d, *J*<sub>CP</sub> = 99.2 Hz), 131.0 (d, *J*<sub>CP</sub> = 96.9 Hz), 129.8 (d,

$J_{CP} = 1.6$  Hz), 128.9 (d,  $J_{CP} = 11.7$  Hz), 128.4 (d,  $J_{CP} = 11.7$  Hz), 121.9 (q,  $J_{CF} = 278.1$  Hz), 121.8 (d,  $J_{CP} = 6.0$  Hz), 119.8 (d,  $J_{CP} = 11.0$  Hz), 114.7 (d,  $J_{CP} = 5.7$  Hz), 113.6 (d,  $J_{CP} = 2.3$  Hz), 65.1 (q,  $J_{CF} = 38.3$  Hz), 55.3, 55.0 (d,  $J_{CP} = 1.9$  Hz), 51.7 (d,  $J_{CP} = 64.5$  Hz).  $^{31}\text{P}\{^1\text{H}\}$  NMR (161 MHz,  $\text{CDCl}_3$ ):  $\delta$  28.2 (s). HRMS (ESI) calcd for  $\text{C}_{25}\text{H}_{25}\text{F}_3\text{O}_5\text{PS}$  ( $\text{M}+\text{H}$ ) $^+$ : 525.1107, found: 525.1107.

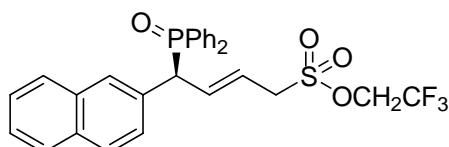

**Entry 6.** White solid. (95.0 mg; 87% yield). The ee was determined on a Daicel Chiralpak IC column with hexane/2-propanol = 80/20, flow = 1.0 mL/min. Retention times: 19.1 min [(*R*)-enantiomer], 25.2 min [(*S*)-enantiomer]. 90% ee.  $[\alpha]_{\text{D}}^{20} = -6.4$  (c 0.50,  $\text{CH}_2\text{Cl}_2$ ). The absolute configuration was assigned by analogy with Table 2, entry 4.

$^1\text{H}$  NMR (400 MHz,  $\text{CDCl}_3$ ):  $\delta$  7.91-7.83 (m, 2H, Ar), 7.75-7.68 (m, 4H, Ar), 7.60-7.35 (m, 5H, Ar), 7.45-7.37 (m, 3H, Ar), 7.31 (t,  $J = 7.6$  Hz, 1H, Ar), 7.22 (dd,  $J = 7.6$  and 2.8 Hz, 2H, Ar), 6.45-6.37 (m, 1H, olefin), 5.60-5.52 (m, 1H, olefin), 4.50 (t,  $J = 9.2$  Hz, 1H, PCH), 4.32-4.17 (m, 2H,  $\text{OCH}_2$ ), 3.87-3.75 (m, 2H,  $\text{CH}_2\text{S}$ ).  $^{13}\text{C}$  NMR (100 MHz,  $\text{CDCl}_3$ ):  $\delta$  136.6 (d,  $J_{CP} = 6.3$  Hz), 133.4 (d,  $J_{CP} = 1.9$  Hz), 132.6 (d,  $J_{CP} = 1.5$  Hz), 132.3 (d,  $J_{CP} = 2.6$  Hz), 132.1 (d,  $J_{CP} = 6.0$  Hz), 131.9 (d,  $J_{CP} = 2.6$  Hz), 131.6 (d,  $J_{CP} = 8.5$  Hz), 131.2 (d,  $J_{CP} = 8.9$  Hz), 131.1 (d,  $J_{CP} = 98.4$  Hz), 131.05 (d,  $J_{CP} = 97.3$  Hz), 128.9 (d,  $J_{CP} = 11.6$  Hz), 128.62 (d,  $J_{CP} = 8.2$  Hz), 128.60, 128.4 (d,  $J_{CP} = 11.9$  Hz), 127.9, 127.7, 127.1 (d,  $J_{CP} = 4.8$  Hz), 126.4, 126.2, 121.9 (q,  $J_{CF} = 277.9$  Hz), 120.0 (d,  $J_{CP} = 11.2$  Hz), 65.0 (q,  $J_{CF} = 38.1$  Hz), 55.9 (d,  $J_{CP} = 1.4$  Hz), 51.7 (d,  $J_{CP} = 64.4$  Hz).  $^{31}\text{P}\{^1\text{H}\}$  NMR (161 MHz,  $\text{CDCl}_3$ ):  $\delta$  32.1 (s). HRMS (ESI) calcd for  $\text{C}_{28}\text{H}_{25}\text{F}_3\text{O}_4\text{PS}$  ( $\text{M}+\text{H}$ ) $^+$ : 545.1158, found: 545.1161.

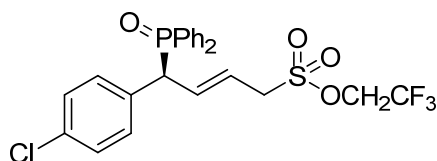

**Entry 7.** White solid. (89.7 mg; 85% yield). The ee was determined on a Daicel Chiralpak IC column with hexane/2-propanol = 80/20, flow = 1.0 mL/min. Retention times: 13.2 min [(*R*)-enantiomer], 17.0 min [(*S*)-enantiomer]. 88% ee.  $[\alpha]_D^{20} = -20.7$  (c 0.500, CH<sub>2</sub>Cl<sub>2</sub>). The absolute configuration was assigned by analogy with Table 2, entry 4.

<sup>1</sup>H NMR (400 MHz, CDCl<sub>3</sub>): δ 7.87-7.81 (m, 2H, Ar), 7.58-7.45 (m, 5H, Ar), 7.41-7.35 (m, 1H, Ar), 7.35-7.28 (m, 2H, Ar), 7.24-7.17 (m, 4H, Ar), 6.32-6.21 (m, 1H, olefin), 5.56-5.46 (m, 1H, olefin), 4.30-4.15 (m, 3H), 3.87-3.75 (m, 2H, CH<sub>2</sub>S). <sup>13</sup>C NMR (100 MHz, CDCl<sub>3</sub>): δ 136.2 (d, *J*<sub>CP</sub> = 6.4 Hz), 133.7 (d, *J*<sub>CP</sub> = 2.6 Hz), 133.1 (d, *J*<sub>CP</sub> = 6.1 Hz), 132.4 (d, *J*<sub>CP</sub> = 2.6 Hz), 132.1 (d, *J*<sub>CP</sub> = 2.7 Hz), 131.6 (d, *J*<sub>CP</sub> = 8.8 Hz), 131.1 (d, *J*<sub>CP</sub> = 9.1 Hz), 130.9 (d, *J*<sub>CP</sub> = 99.2 Hz), 130.7 (d, *J*<sub>CP</sub> = 5.3 Hz), 130.67 (d, *J*<sub>CP</sub> = 97.6 Hz), 129.04 (d, *J*<sub>CP</sub> = 3.7 Hz), 128.99 (d, *J*<sub>CP</sub> = 9.4 Hz), 121.9 (q, *J*<sub>CF</sub> = 278.1 Hz), 120.2 (d, *J*<sub>CP</sub> = 11.0 Hz), 64.9 (q, *J*<sub>CF</sub> = 37.7 Hz), 54.9 (d, *J*<sub>CP</sub> = 1.9 Hz), 51.9 (d, *J*<sub>CP</sub> = 64.1 Hz). <sup>31</sup>P{<sup>1</sup>H} NMR (161 MHz, CDCl<sub>3</sub>): δ 27.9 (s). HRMS (ESI) calcd for C<sub>24</sub>H<sub>22</sub>ClF<sub>3</sub>O<sub>4</sub>PS (M+H)<sup>+</sup>: 529.0612, found: 529.0616.

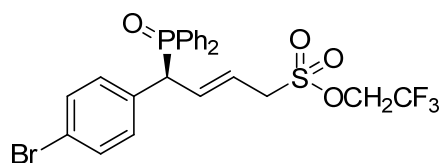

**Entry 8.** White solid. (99.5 mg; 87% yield). The ee was determined on a Daicel Chiralpak AD column with hexane/2-propanol = 80/20, flow = 1.0 mL/min. Retention times: 40.3 min [(*S*)-enantiomer], 53.1 min [(*R*)-enantiomer]. 93% ee.  $[\alpha]_D^{20} = -25.9$  (c 0.500, CH<sub>2</sub>Cl<sub>2</sub>). The absolute configuration was assigned by analogy with Table 2, entry 4.

<sup>1</sup>H NMR (400 MHz, CDCl<sub>3</sub>): δ 7.89-7.83 (m, 2H, Ar), 7.61-7.48 (m, 5H, Ar), 7.40-7.38 (m, 1H, Ar), 7.35-7.30 (m, 4H, Ar), 7.15 (d, *J* = 6.8 Hz, 2H, Ar), 6.30-6.22 (m, 1H, olefin), 5.58-5.46 (m, 1H, olefin), 4.33-4.24 (m, 3H), 3.89-3.76 (m, 2H, CH<sub>2</sub>S). <sup>13</sup>C NMR (100 MHz, CDCl<sub>3</sub>): δ 136.5 (d, *J*<sub>CP</sub> = 6.8 Hz), 132.0 (d, *J*<sub>CP</sub> = 2.7 Hz), 131.9 (d, *J*<sub>CP</sub> = 2.6 Hz), 131.4 (d, *J*<sub>CP</sub> = 97.7 Hz), 131.1 (d, *J*<sub>CP</sub> = 8.7 Hz), 131.07 (d, *J*<sub>CP</sub> = 8.8 Hz), 128.8 (d, *J*<sub>CP</sub> = 13.3 Hz), 128.7 (d, *J*<sub>CP</sub> = 12.9 Hz), 121.9 (q, *J*<sub>CF</sub> =

277.7 Hz), 120.3 (d,  $J_{\text{CP}} = 2.1$  Hz), 64.6 (q,  $J_{\text{CF}} = 37.8$  Hz), 54.7, 45.9 (d,  $J_{\text{CP}} = 68.0$  Hz), 20.7 (d,  $J_{\text{CP}} = 2.6$  Hz), 12.4 (d,  $J_{\text{CP}} = 13.3$  Hz).  $^{31}\text{P}\{^1\text{H}\}$  NMR (161 MHz,  $\text{CDCl}_3$ ):  $\delta$  27.9 (s). HRMS (ESI) calcd for  $\text{C}_{24}\text{H}_{22}\text{BrF}_3\text{O}_4\text{PS}$  ( $\text{M}+\text{H}$ ) $^+$ : 573.0106, found: 573.0114.

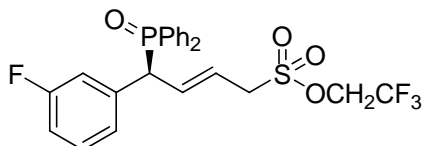

**Entry 9.** White solid. (86.9 mg; 86% yield). The ee was determined on a Daicel Chiralpak IC column with hexane/2-propanol = 80/20, flow = 1.0 mL/min. Retention times: 12.1 min [(*R*)-enantiomer], 14.5 min [(*S*)-enantiomer]. 92% ee.  $[\alpha]_{\text{D}}^{20} = -15.4$  (c 0.500,  $\text{CH}_2\text{Cl}_2$ ). The absolute configuration was assigned by analogy with Table 2, entry 4.

$^1\text{H}$  NMR (400 MHz,  $\text{CDCl}_3$ ):  $\delta$  7.89-7.83 (m, 2H, Ar), 7.60-7.46 (m, 5H, Ar), 7.40-7.38 (m, 1H, Ar), 7.35-7.28 (m, 2H, Ar), 7.19-7.15 (m, 1H, Ar), 7.04 (d,  $J = 8.0$  Hz, 1H, Ar), 7.15 (dd,  $J = 9.2$  and 1.6 Hz, 1H, Ar), 6.89 (t,  $J = 8.0$  Hz, 1H, Ar), 6.30-6.22 (m, 1H, olefin), 5.54-5.46 (m, 1H, olefin), 4.33-4.21 (m, 3H), 3.89-3.76 (m, 2H,  $\text{CH}_2\text{S}$ ).  $^{13}\text{C}$  NMR (100 MHz,  $\text{CDCl}_3$ ):  $\delta$  162.7 (dd,  $J_{\text{CF}} = 246.9$  Hz,  $J_{\text{CP}} = 1.9$  Hz), 137.0 (dd,  $J = 7.4$  and 5.9 Hz), 136.0 (d,  $J_{\text{CP}} = 6.3$  Hz), 132.4 (d,  $J_{\text{CP}} = 2.6$  Hz), 132.0 (d,  $J_{\text{CP}} = 2.6$  Hz), 131.5 (d,  $J_{\text{CP}} = 8.6$  Hz), 131.1 (d,  $J_{\text{CP}} = 9.0$  Hz), 130.8 (d,  $J_{\text{CP}} = 99.5$  Hz), 130.6 (d,  $J_{\text{CP}} = 96.9$  Hz), 130.3 (dd,  $J = 9.3$  and 2.6 Hz), 129.0 (d,  $J_{\text{CP}} = 11.5$  Hz), 128.5 (d,  $J_{\text{CP}} = 11.9$  Hz), 125.1 (dd,  $J = 6.0$  and 3.0 Hz), 121.9 (q,  $J_{\text{CF}} = 277.9$  Hz), 120.2 (d,  $J = 10.7$  Hz), 116.4 (dd,  $J = 12.3$  and 5.9 Hz), 114.6 (dd,  $J = 21.2$  and 1.2 Hz), 64.9 (hept,  $J_{\text{CF}} = 38.2$  Hz), 54.8 (d,  $J_{\text{CP}} = 1.4$  Hz), 51.3 (dd,  $J_{\text{CP}} = 63.9$  Hz,  $J_{\text{CF}} = 1.8$  Hz).  $^{31}\text{P}\{^1\text{H}\}$  NMR (161 MHz,  $\text{CDCl}_3$ ):  $\delta$  27.9 (s). HRMS (ESI) calcd for  $\text{C}_{24}\text{H}_{22}\text{F}_4\text{O}_4\text{PS}$  ( $\text{M}+\text{H}$ ) $^+$ : 513.0907, found: 513.0911.

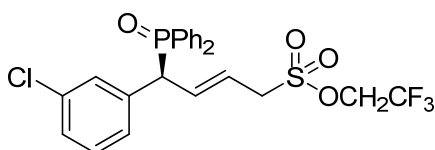

**Entry 10.** White solid. (86.5 mg; 82% yield). The ee was determined on a Daicel Chiralpak IC column with hexane/2-propanol = 80/20, flow = 1.0 mL/min. Retention times: 12.0 min [(*R*)-enantiomer], 14.1 min [(*S*)-enantiomer]. 89% ee.  $[\alpha]_D^{20} = -20.7$  (c 0.500, CH<sub>2</sub>Cl<sub>2</sub>). The absolute configuration was assigned by analogy with Table 2, entry 4.

<sup>1</sup>H NMR (400 MHz, CDCl<sub>3</sub>): δ 7.88-7.83 (m, 2H, Ar), 7.61-7.46 (m, 5H, Ar), 7.43-7.38 (m, 1H, Ar), 7.34-7.28 (m, 2H, Ar), 7.23-7.12 (m, 4H, Ar), 6.32-6.22 (m, 1H, olefin), 5.58-5.48 (m, 1H, olefin), 4.35-4.24 (m, 3H), 3.89-3.77 (m, 2H, CH<sub>2</sub>S). <sup>13</sup>C NMR (100 MHz, CDCl<sub>3</sub>): δ 136.6 (d, *J*<sub>CP</sub> = 5.9 Hz), 135.9 (d, *J* = 6.3 Hz), 134.5 (d, *J*<sub>CP</sub> = 1.9 Hz), 132.4 (d, *J*<sub>CP</sub> = 2.9 Hz), 132.1 (d, *J*<sub>CP</sub> = 3.0 Hz), 131.6 (d, *J*<sub>CP</sub> = 8.6 Hz), 131.1 (d, *J*<sub>CP</sub> = 8.9 Hz), 130.8 (d, *J*<sub>CP</sub> = 99.5 Hz), 130.5 (d, *J*<sub>CP</sub> = 98.4 Hz), 130.0 (d, *J* = 1.5 Hz), 129.5 (d, *J*<sub>CP</sub> = 5.5 Hz), 129.0 (d, *J*<sub>CP</sub> = 11.9 Hz), 128.5 (d, *J* = 11.9 Hz), 127.8 (d, *J* = 2.3 Hz), 127.5 (d, *J* = 5.6 Hz), 121.9 (q, *J*<sub>CF</sub> = 277.9 Hz), 120.3 (d, *J* = 10.8 Hz), 64.9 (hept, *J*<sub>CF</sub> = 37.8 Hz), 54.8 (d, *J*<sub>CP</sub> = 1.1 Hz), 51.3 (d, *J*<sub>CP</sub> = 63.6 Hz). <sup>31</sup>P{<sup>1</sup>H} NMR (161 MHz, CDCl<sub>3</sub>): δ 28.0 (s). HRMS (ESI) calcd for C<sub>24</sub>H<sub>22</sub>ClF<sub>3</sub>O<sub>4</sub>PS (M+H)<sup>+</sup>: 529.0612, found: 529.0615.

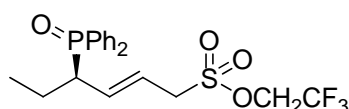

**Entry 11.** White solid. (74.8 mg; 84% yield). The ee was determined on a Daicel Chiralpak IC column with hexane/2-propanol = 80/20, flow = 1.0 mL/min. Retention times: 18.2 min [(*R*)-enantiomer], 19.9 min [(*S*)-enantiomer]. 71% ee.  $[\alpha]_D^{20} = -12.7$  (c 0.500, CH<sub>2</sub>Cl<sub>2</sub>). The absolute configuration was assigned by analogy with Table 2, entry 4.

<sup>1</sup>H NMR (400 MHz, CDCl<sub>3</sub>): δ 7.82-7.50 (m, 4H, Ar), 7.52-7.45 (m, 6H, Ar), 5.89-5.82 (m, 1H, olefin), 5.56-5.48 (m, 1H, olefin), 4.40-4.33 (m, 2H, OCH<sub>2</sub>), 3.91-3.77 (m, 2H, CH<sub>2</sub>S), 3.08-2.95 (m, 1H, PCH), 1.79-1.65 (m, 2H), 0.92 (t, *J*<sub>CH</sub> = 7.2 Hz, 3H). <sup>13</sup>C NMR (100 MHz, CDCl<sub>3</sub>): δ 136.6 (d, *J*<sub>CP</sub> = 5.9 Hz), 135.9 (d, *J* = 6.3 Hz), 134.5 (d, *J*<sub>CP</sub> = 1.9 Hz), 132.4 (d, *J*<sub>CP</sub> = 2.9 Hz), 132.1 (d, *J*<sub>CP</sub> = 3.0 Hz), 131.6 (d, *J*<sub>CP</sub> = 8.6 Hz), 131.1 (d, *J*<sub>CP</sub> = 8.9 Hz), 130.8 (d, *J*<sub>CP</sub> = 99.5 Hz), 130.5 (d, *J*<sub>CP</sub> = 98.4

Hz), 130.0 (d,  $J = 1.5$  Hz), 129.5 (d,  $J_{\text{CP}} = 5.5$  Hz), 129.0 (d,  $J_{\text{CP}} = 11.9$  Hz), 128.5 (d,  $J = 11.9$  Hz), 127.8 (d,  $J = 2.3$  Hz), 127.5 (d,  $J = 5.6$  Hz), 121.9 (q,  $J_{\text{CF}} = 277.9$  Hz), 120.3 (d,  $J = 10.8$  Hz), 64.9 (hept,  $J_{\text{CF}} = 37.8$  Hz), 54.8 (d,  $J_{\text{CP}} = 1.1$  Hz), 51.3 (d,  $J_{\text{CP}} = 63.6$  Hz).  $^{31}\text{P}\{^1\text{H}\}$  NMR (161 MHz,  $\text{CDCl}_3$ ):  $\delta$  28.0 (s). HRMS (ESI) calcd for  $\text{C}_{20}\text{H}_{23}\text{F}_3\text{O}_4\text{PS}$  ( $\text{M}+\text{H}$ ) $^+$ : 447.1001, found: 447.0999.

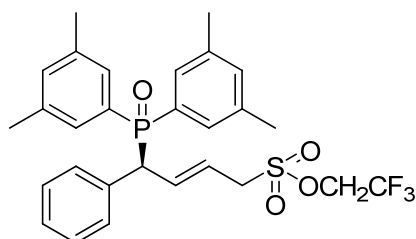

**Entry 12.** White solid. (95.5 mg; 87% yield). The ee was determined on a Daicel Chiralpak IC column with hexane/2-propanol = 85/15, flow = 1.0 mL/min. Retention times: 12.7 min [(*R*)-enantiomer], 16.6 min [(*S*)-enantiomer]. 86% ee.  $[\alpha]_{\text{D}}^{20} = -14.5$  (c 0.50,  $\text{CH}_2\text{Cl}_2$ ). The absolute configuration was assigned by analogy with Table 2, entry 4.

$^1\text{H}$  NMR (400 MHz,  $\text{CDCl}_3$ ):  $\delta$  7.45 (d,  $J = 11.2$  Hz, 2H, Ar), 7.28-7.18 (m, 6H, Ar), 7.04 (d,  $J = 11.2$  Hz, 2H, Ar), 6.97 (s, 1H, Ar), 6.34-6.26 (m, 1H, olefin), 5.58-5.47 (m, 1H, olefin), 4.32-4.15 (m, 3H), 3.87-3.77 (m, 2H,  $\text{CH}_2\text{S}$ ), 2.73 (s, 6H, Me), 2.17 (s, 6H, Me).  $^{13}\text{C}$  NMR (100 MHz,  $\text{CDCl}_3$ ):  $\delta$  138.6 (d,  $J_{\text{CP}} = 11.9$  Hz), 137.9 (d,  $J = 12.3$  Hz), 137.0 (d,  $J_{\text{CP}} = 6.3$  Hz), 134.8 (d,  $J_{\text{CP}} = 6.0$  Hz), 133.9 (d,  $J_{\text{CP}} = 3.0$  Hz), 133.4 (d,  $J_{\text{CP}} = 3.0$  Hz), 131.1 (d,  $J_{\text{CP}} = 98.8$  Hz), 130.8 (d,  $J_{\text{CP}} = 96.2$  Hz), 129.5 (d,  $J_{\text{CP}} = 5.6$  Hz), 129.1 (d,  $J = 8.2$  Hz), 128.8 (d,  $J_{\text{CP}} = 8.9$  Hz), 128.7 (d,  $J_{\text{CP}} = 2.8$  Hz), 127.5 (d,  $J_{\text{CP}} = 2.2$  Hz), 121.9 (q,  $J_{\text{CF}} = 277.9$  Hz), 119.6 (d,  $J = 11.1$  Hz), 65.2 (q,  $J_{\text{CF}} = 38.1$  Hz), 55.0 (d,  $J_{\text{CP}} = 1.1$  Hz), 51.4 (d,  $J_{\text{CP}} = 63.6$  Hz), 21.4 (d,  $J_{\text{CP}} = 0.8$  Hz), 21.2 (d,  $J_{\text{CP}} = 0.7$  Hz).  $^{31}\text{P}\{^1\text{H}\}$  NMR (161 MHz,  $\text{CDCl}_3$ ):  $\delta$  28.8 (s). HRMS (ESI) calcd for  $\text{C}_{28}\text{H}_{31}\text{F}_3\text{O}_4\text{PS}$  ( $\text{M}+\text{H}$ ) $^+$ : 551.1627, found: 551.1626.

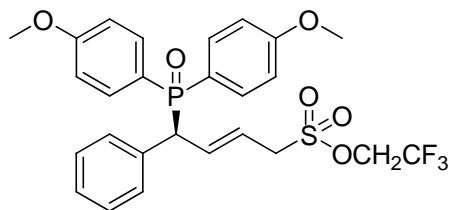

**Entry 13.** White solid. (95.0 mg; 86% yield). The ee was determined on a Daicel Chiralpak AS column with hexane/2-propanol = 85/15, flow = 1.0 mL/min. Retention times: 41.8 min [(*R*)-enantiomer], 54.8 min [(*S*)-enantiomer]. 76% ee.  $[\alpha]_D^{20} = -8.6$  (c 0.50, CH<sub>2</sub>Cl<sub>2</sub>). The absolute configuration was assigned by analogy with Table 2, entry 4.

<sup>1</sup>H NMR (400 MHz, CDCl<sub>3</sub>): δ 7.73 (t, *J* = 8.8 Hz, 2H, Ar), 7.36 (dd, *J* = 10.4 and 8.8 Hz, 2H, Ar), 7.26-7.20 (m, 5H, Ar), 7.02 (d, *J* = 6.8 Hz, 2H, Ar), 6.78 (d, *J* = 6.8 Hz, 2H, Ar), 6.36-6.28 (m, 1H, olefin), 5.55-5.47 (m, 1H, olefin), 4.30-4.19 (m, 3H), 3.86 (s, 3H, OMe), 3.84-3.78 (m, 2H, CH<sub>2</sub>S), 3.76 (s, 3H, OMe). <sup>13</sup>C NMR (100 MHz, CDCl<sub>3</sub>): δ 162.6 (d, *J*<sub>CP</sub> = 2.6 Hz), 162.2 (d, *J* = 3.0 Hz), 137.2 (d, *J*<sub>CP</sub> = 6.3 Hz), 135.0 (d, *J*<sub>CP</sub> = 6.0 Hz), 133.4 (d, *J*<sub>CP</sub> = 10.0 Hz), 133.1 (d, *J*<sub>CP</sub> = 10.0 Hz), 129.5 (d, *J*<sub>CP</sub> = 5.6 Hz), 128.8 (d, *J*<sub>CP</sub> = 1.8 Hz), 127.5 (d, *J*<sub>CP</sub> = 2.3 Hz), 122.7 (d, *J* = 105.4 Hz), 122.1 (d, *J*<sub>CP</sub> = 104.3 Hz), 121.9 (q, *J*<sub>CF</sub> = 277.9 Hz), 119.4 (d, *J* = 10.4 Hz), 114.4 (d, *J* = 12.2 Hz), 113.9 (d, *J* = 12.6 Hz), 65.1 (q, *J*<sub>CF</sub> = 38.1 Hz), 55.4, 55.3, 55.0 (d, *J*<sub>CP</sub> = 1.1 Hz), 52.3 (d, *J*<sub>CP</sub> = 65.1 Hz). <sup>31</sup>P {<sup>1</sup>H} NMR (161 MHz, CDCl<sub>3</sub>): δ 28.6 (s). HRMS (ESI) calcd for C<sub>26</sub>H<sub>27</sub>F<sub>3</sub>O<sub>6</sub>PS (M+H)<sup>+</sup>: 555.1213, found: 555.1212.

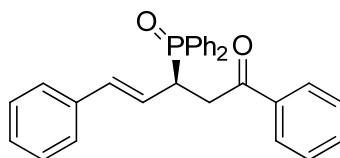

**Table 1, Entry 1.** White solid. (81.0 mg; 93% yield). The ee was determined on a Daicel Chiralpak IC column with hexane/2-propanol = 80/20, flow = 1.0 mL/min. Retention times: 14.3 min [(*S*)-enantiomer], 17.2 min [(*R*)-enantiomer]. 93% ee. The absolute configuration was assigned by analogy with the literature example (Pincer Pd-catalyzed asymmetric 1,4-addition of diarylphosphines to  $\alpha,\beta$ -unsaturated enones).<sup>1</sup>

$^1\text{H}$  NMR (400 MHz,  $\text{CDCl}_3$ ):  $\delta$  7.93-7.88 (m, 4H, Ar), 7.83-7.76 (m, 2H, Ar), 7.56-7.38 (m, 9H, Ar), 7.23-7.12 (m, 5H, Ar), 6.43 (dd,  $J = 16.0$  and  $4.0$  Hz, 1H, olefin), 6.15 (ddd,  $J = 16.0$ ,  $9.2$  and  $6.8$  Hz, 1H, olefin), 4.22-4.10 (m, 1H), 3.69 (ddd,  $J = 18.0$ ,  $10.4$  and  $4.4$  Hz, 1H), 3.30 (ddd,  $J = 18.0$ ,  $11.6$  and  $2.4$  Hz, 1H).  $^{31}\text{P}\{^1\text{H}\}$  NMR (161 MHz,  $\text{CDCl}_3$ ):  $\delta$  34.6 (s). HRMS (ESI) calcd for  $\text{C}_{29}\text{H}_{26}\text{O}_2\text{P}$  ( $\text{M}+\text{H}$ ) $^+$ : 437.1665, found: 437.1666.

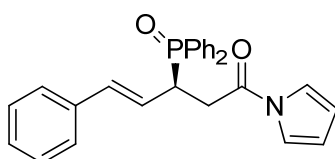

**Table 1, Entry 2.** (CAS: 1334387-70-0). White solid. (76.2 mg; 90% yield). The ee was determined on a Daicel Chiralpak AD-H column with hexane/2-propanol = 80/20, flow = 1.0 mL/min. Retention times: 25.3 min [(*S*)-enantiomer], 33.1 min [(*R*)-enantiomer]. 96% ee. The absolute configuration was assigned by analogy with the literature example (Pincer Pd-catalyzed asymmetric 1,4-addition of diarylphosphines to  $\alpha,\beta$ -unsaturated *N*-acylpyrroles).<sup>4</sup>

$^1\text{H}$  NMR (400 MHz,  $\text{CDCl}_3$ ):  $\delta$  7.91 (t,  $J_{\text{HH}} = 8.8$  Hz, 2H, Ar), 7.79 (dd,  $J = 10.0$  and  $8.0$  Hz, 2H, Ar), 7.57-7.16 (m, 13H), 6.45 (dd,  $J = 15.6$  and  $3.6$  Hz, 1H, olefin), 6.25 (s, 2H), 6.13 (ddd,  $J = 15.6$ ,  $8.8$  and  $2.4$  Hz, 1H, olefin), 4.06 (q,  $J = 8.8$  Hz, 1H), 3.41 (ddd,  $J_{\text{HH}} = 17.2$  and  $10.0$  Hz,  $J_{\text{HP}} = 4.4$  Hz, 1H), 3.21 (ddd,  $J_{\text{HH}} = 16.8$  and  $2.0$  Hz,  $J_{\text{HP}} = 10.8$  Hz, 1H).  $^{31}\text{P}\{^1\text{H}\}$  NMR (161 MHz,  $\text{CDCl}_3$ ):  $\delta$  33.7 (s).

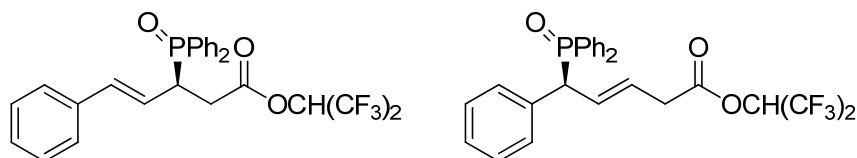

**Table 1, Entry 3.** White solid. (64.1 mg; 61% combined yield). 1,4-adduct : 1,6-adduct = 1 : 2.

The ee of 1,4-adduct was determined on a Daicel Chiralpak AD-H column with hexane/2-propanol = 80/20, flow = 1.0 mL/min. Retention times: 6.6 min [(*S*)-enantiomer], 11.0 min [(*R*)-enantiomer]. 61% ee. The absolute configuration was

assigned by analogy with the literature examples (Pincer Pd-catalyzed asymmetric 1,4-addition of diarylphosphines to  $\alpha,\beta$ -unsaturated carboxylic esters).<sup>5</sup>

<sup>1</sup>H NMR (400 MHz, CDCl<sub>3</sub>) for 1,4-adduct:  $\delta$  6.35 (dd,  $J$  = 16.0 and 4.4 Hz, 1H, olefin), 6.02 (ddd,  $J$  = 16.0, 8.8 and 6.4 Hz, 1H, olefin), 3.83-3.74 (m, 1H), 3.07 (ddd,  $J$  = 16.4 and 8.8 and 3.6 Hz, 1H), 2.94 (ddd,  $J$  = 16.4, 11.2 and 5.2 Hz, 1H). <sup>31</sup>P{<sup>1</sup>H} NMR (161 MHz, CDCl<sub>3</sub>):  $\delta$  33.5 (s). HRMS (ESI) calcd for C<sub>26</sub>H<sub>22</sub>F<sub>6</sub>O<sub>3</sub>P (M+H)<sup>+</sup>: 527.1205, found: 527.1201.

The ee of 1,6-adduct was determined on a Daicel Chiralpak AD-H column with hexane/2-propanol = 80/20, flow = 1.0 mL/min. Retention times: 8.6 min [(*R*)-enantiomer], 9.6 min [(*S*)-enantiomer]. 71% ee. The absolute configuration was assigned by analogy with Table 2, entry 4.

<sup>1</sup>H NMR (400 MHz, CDCl<sub>3</sub>) for 1,6-adduct:  $\delta$  6.15-6.06 (m, 1H, olefin), 5.71-5.63 (m, 1H), 5.60-5.48 (m, 1H), 4.26 (t,  $J$  = 9.6 Hz, 1H), 3.24-3.10 (m, 2H). <sup>31</sup>P{<sup>1</sup>H} NMR (161 MHz, CDCl<sub>3</sub>):  $\delta$  33.0 (s). HRMS (ESI) calcd for C<sub>26</sub>H<sub>22</sub>F<sub>6</sub>O<sub>3</sub>P (M+H)<sup>+</sup>: 527.1205, found: 527.1201.

### Experimental Procedures for the 1,6-Addition Reaction in Eq. 2

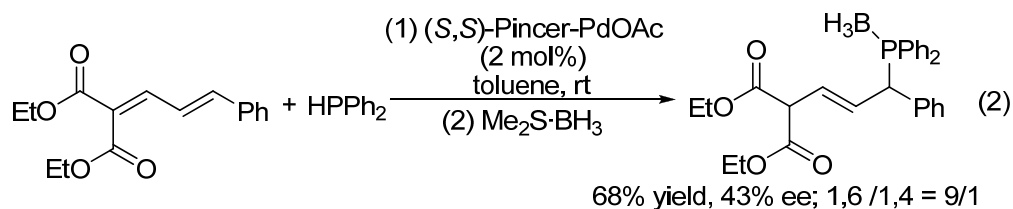

Diphenylphosphine (18.6 mg, 0.10 mmol) was added to a solution of (*S,S*)-Pd catalyst (1.4 mg, 2  $\mu$ mol Pd) and [(*E*)-3-phenyl-2-propenylidene]-diethyl ester (32.9 mg, 0.12 mmol) in toluene (2.0 mL) at room temperature, then the resulting solution was stirred for 17 h. The reaction was quenched with Me<sub>2</sub>S·BH<sub>3</sub> (0.15 mL; 2 M in THF) and concentrated under vacuum. The residue was purified by silica gel chromatography with hexane/EtOAc = 10/1 to afford the 1,6-adduct as a white solid.

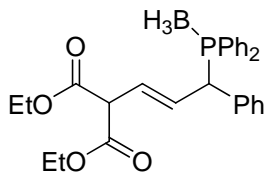

White solid. (32.0 mg; 68% yield). The ee was determined on a Daicel Chiralpak AD column with hexane/2-propanol = 80/20, flow = 1.0 mL/min. Retention times: 7.8 min [major enantiomer], 8.7 min [minor enantiomer]. 43% ee.  $[\alpha]_D^{20} = 7.3$  (c 1.00, CH<sub>2</sub>Cl<sub>2</sub>),

<sup>1</sup>H NMR (400 MHz, CDCl<sub>3</sub>): δ 7.83 (t, *J* = 8.8 Hz, 2H, Ar), 7.52-7.32 (m, 6H, Ar), 7.30-7.26 (m, 2H, Ar), 7.20-7.10 (m, 5H, Ar), 6.17 (ddd, *J* = 15.2, 9.6 and 6.4 Hz, 1H, olefin), 5.71 (ddd, *J* = 15.2, 9.6 and 3.2 Hz, 1H, olefin), 4.44 (dd, *J* = 15.2 and 9.6 Hz, 1H), 4.12 (q, *J* = 7.2 Hz, 2H), 4.10-4.00 (m, 2H), 3.96 (d, *J* = 9.2 Hz, 1H), 1.19 (t, *J* = 7.2 Hz, 3H), 1.18 (t, *J* = 7.2 Hz, 3H). <sup>13</sup>C NMR (100 MHz, CDCl<sub>3</sub>): δ 167.5 (d, *J*<sub>CP</sub> = 1.9 Hz), 167.3 (d, *J* = 2.6 Hz), 135.3 (d, *J*<sub>CP</sub> = 1.5 Hz), 133.5 (d, *J*<sub>CP</sub> = 8.4 Hz), 132.9 (d, *J*<sub>CP</sub> = 8.4 Hz), 131.4 (d, *J*<sub>CP</sub> = 2.2 Hz), 131.3, 131.0 (d, *J*<sub>CP</sub> = 2.6 Hz), 129.4 (d, *J*<sub>CP</sub> = 4.9 Hz), 128.6 (d, *J*<sub>CP</sub> = 9.8 Hz), 128.3 (d, *J* = 9.8 Hz), 128.1 (d, *J*<sub>CP</sub> = 2.3 Hz), 127.8 (d, *J*<sub>CP</sub> = 52.6 Hz), 127.3 (d, *J*<sub>CP</sub> = 2.7 Hz), 127.1 (q, *J*<sub>CF</sub> = 52.7 Hz), 126.1 (d, *J* = 11.0 Hz), 61.7, 52.2 (q, *J*<sub>CF</sub> = 1.5 Hz), 48.0 (d, *J*<sub>CP</sub> = 29.9 Hz), 13.94, 13.93. <sup>31</sup>P{<sup>1</sup>H} NMR (161 MHz, CDCl<sub>3</sub>): δ 24.7 (m). HRMS (ESI) calcd for C<sub>28</sub>H<sub>36</sub>BNO<sub>4</sub>P (M+NH<sub>4</sub>)<sup>+</sup>: 491.2506, found: 491.2511.

### Experimental Procedure for Rhodium-Catalyzed 1,4-Addition of Phenylboronic Acid to Cyclohexenone

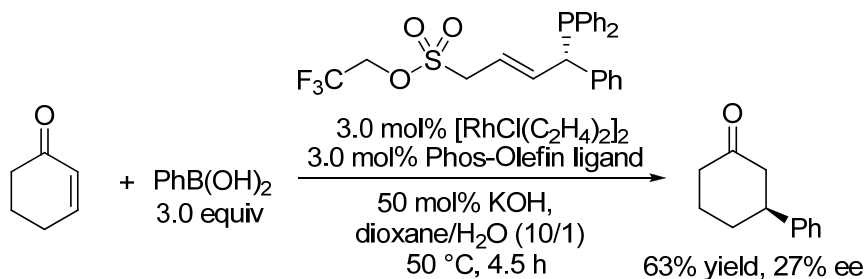

A mixture of [RhCl(C<sub>2</sub>H<sub>4</sub>)<sub>2</sub>]<sub>2</sub> (1.2 mg, 6 μmol Rh) and the allylic phosphine (2.9 mg, 6 μmol; Table 2, Entry 1) in dioxane (2 mL) was stirred at room temperature for 20 min. Then, 0.50 M aqueous KOH (0.20 mL, 0.10 mmol) was added into it, followed by the

addition of cyclohexenone (119.2 mg, 0.20 mmol) and PhB(OH)<sub>2</sub> (73.2 mg, 0.60 mmol). The solution was stirred for 4.5 h at 50 °C, and was then passed through a pad of silica gel with EtOAc, and the solvent was removed under vacuum. The residue was chromatographed on silica gel with EtOAc/hexane to afford the 1,4-adduct .

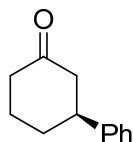

(CAS 57344-86-2). (22.0 mg; 63% yield). <sup>1</sup>H NMR data of the product are identical with the reported data of the product in literature.<sup>6</sup> The ee was determined on a Daicel Chiralcel OD column with hexane/2-propanol = 98/2, flow = 1.0 mL/min. Retention times: 12.8 min [(*S*)-enantiomer], 13.6 min [(*R*)-enantiomer]. 27% ee.

#### General Procedures for the Preparation of $\alpha,\beta,\gamma,\delta$ -Unsaturated Sulfonic Esters

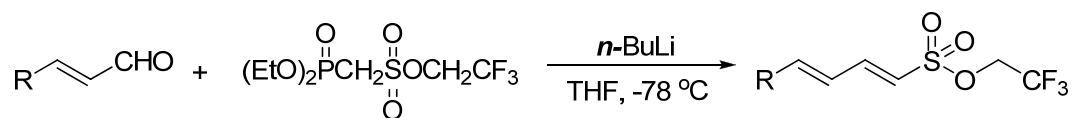

*n*-BuLi (1.92 mmol; 2.5 M in hexane) was added to a solution of 2,2,2-trifluoroethyl (diethoxyphosphoryl)methanesulfonate (0.6 g, 1.92 mmol) in THF at –78 °C and stirred for 20 min. Aldehyde (1.6 mmol) was added to it, and the resulting solution was allowed to warm to room temperature slowly and stirred at room temperature for 20 h. After quenching with AcOH (0.2 mL), the mixture was extracted with EtOAc, dried over MgSO<sub>4</sub>, filtered and concentrated under vacuum. The residue was purified by silica gel chromatography with hexane/EtOAc = 30/1 to afford product as a white solid.

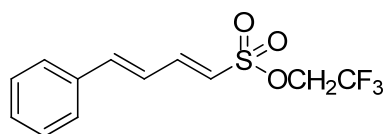

(0.42 g; 89% yield). <sup>1</sup>H NMR (300MHz, CDCl<sub>3</sub>): δ 7.50-7.46 (m, 2H), 7.42-7.36 (m, 4H), 7.03 (d, *J*<sub>HH</sub> = 15.0 Hz, 1H, olefin), 6.87-6.78 (m, 1H, olefin), 6.35 (d, *J*<sub>HH</sub> = 15.0

Hz, 1H, olefin), 4.42 (q,  $J_{\text{HF}} = 7.8$  Hz, 2H,  $\text{OCH}_2$ ).  $^{13}\text{C}$  NMR (75 MHz,  $\text{CDCl}_3$ ):  $\delta$  146.7, 145.0, 135.0, 130.3, 129.1, 127.8, 122.7, 122.1 (q,  $J_{\text{CF}} = 277.8$  Hz), 120.3, 64.6 (q,  $J_{\text{CF}} = 38.0$  Hz). HRMS (ESI) calcd for  $\text{C}_{12}\text{H}_{15}\text{F}_3\text{NO}_3\text{S}$  ( $\text{M}+\text{NH}_4$ ) $^+$ : 310.0719, found: 310.0726.

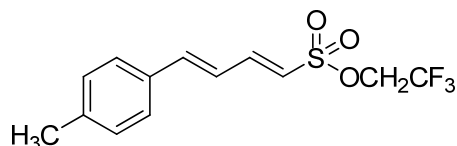

(0.38 g; 77% yield).  $^1\text{H}$  NMR (300MHz,  $\text{CDCl}_3$ ):  $\delta$  7.36-7.28 (m, 3H), 7.12-7.09 (m, 2H), 6.92 (d,  $J_{\text{HH}} = 15.0$  Hz, 1H, olefin), 6.74-6.65 (m, 1H, olefin), 6.22 (d,  $J_{\text{HH}} = 15.0$  Hz, 1H, olefin), 4.32 (q,  $J_{\text{HF}} = 8.1$  Hz, 2H,  $\text{OCH}_2$ ), 2.28 (s, 3H, Me).  $^{13}\text{C}$  NMR (75 MHz,  $\text{CDCl}_3$ ):  $\delta$  147.0, 145.1, 140.8, 132.3, 129.8, 127.8, 122.1 (q,  $J_{\text{CF}} = 277.8$  Hz), 121.8, 120.5, 64.6 (q,  $J_{\text{CF}} = 38.0$  Hz), 21.5. HRMS (ESI) calcd for  $\text{C}_{13}\text{H}_{13}\text{F}_3\text{NaO}_3\text{S}$  ( $\text{M}+\text{Na}$ ) $^+$ : 329.0430, found: 329.0417.

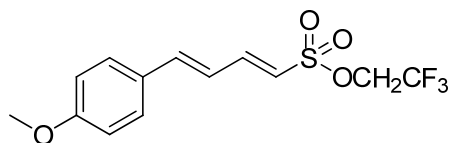

(0.39 g; 76% yield).  $^1\text{H}$  NMR (300MHz,  $\text{CDCl}_3$ ):  $\delta$  7.46-7.37 (m, 3H), 7.01 (d,  $J_{\text{HH}} = 15.0$  Hz, 1H, olefin), 6.93-6.90 (m, 2H, Ar), 6.77-6.68 (m, 1H, olefin), 6.28 (d,  $J_{\text{HH}} = 15.0$  Hz, 1H, olefin), 4.41 (q,  $J_{\text{HF}} = 8.1$  Hz, 2H,  $\text{OCH}_2$ ), 3.85 (s, 3H, OMe).  $^{13}\text{C}$  NMR (75 MHz,  $\text{CDCl}_3$ ):  $\delta$  161.5, 147.3, 144.9, 129.5, 127.8, 122.3 (q,  $J_{\text{CF}} = 277.8$  Hz), 120.6, 119.5, 114.6, 64.6 (q,  $J_{\text{CF}} = 38.0$  Hz), 55.5. HRMS (ESI) calcd for  $\text{C}_{13}\text{H}_{17}\text{F}_3\text{NO}_4\text{S}$  ( $\text{M}+\text{NH}_4$ ) $^+$ : 340.0825, found: 340.0817.

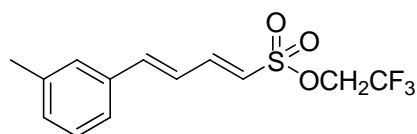

(0.37 g; 76% yield).  $^1\text{H}$  NMR (300MHz,  $\text{CDCl}_3$ ):  $\delta$  7.46-7.38 (m, 1H), 7.30-7.25 (m, 3H), 7.20-7.18 (m, 1H), 7.02 (d,  $J_{\text{HH}} = 15.0$  Hz, 1H, olefin), 6.88-6.79 (m, 1H, olefin), 6.33 (d,  $J_{\text{HH}} = 15.0$  Hz, 1H, olefin), 4.42 (q,  $J_{\text{HF}} = 7.8$  Hz, 2H,  $\text{OCH}_2$ ), 2.37 (s, 3H, Me).

$^{13}\text{C}$  NMR (75 MHz,  $\text{CDCl}_3$ ):  $\delta$  146.8, 145.3, 138.9, 135.0, 131.2, 129.0, 128.5, 125.1, 122.6, 122.1 (q,  $J_{\text{CF}} = 277.8$  Hz), 121.0, 64.6 (q,  $J_{\text{CF}} = 37.5$  Hz), 21.4. HRMS (ESI) calcd for  $\text{C}_{13}\text{H}_{17}\text{F}_3\text{NO}_3\text{S}$  ( $\text{M}+\text{NH}_4$ ) $^+$ : 324.0876, found: 324.0879.

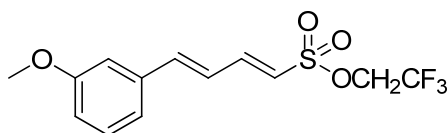

(0.38 g; 76% yield).  $^1\text{H}$  NMR (300MHz,  $\text{CDCl}_3$ ):  $\delta$  7.45-7.29 (m, 2H), 7.09-6.78 (m, 5H), 6.35 (d,  $J_{\text{HH}} = 14.7$  Hz, 1H, olefin), 4.42 (q,  $J_{\text{HF}} = 7.2$  Hz, 2H,  $\text{OCH}_2$ ), 3.83 (s, 3H, OMe).  $^{13}\text{C}$  NMR (75 MHz,  $\text{CDCl}_3$ ):  $\delta$  160.1, 146.5, 144.9, 136.4, 130.1, 123.1, 122.3 (q,  $J_{\text{CF}} = 277.8$  Hz), 121.4, 120.5, 116.0, 112.9, 64.6 (q,  $J_{\text{CF}} = 38.6$  Hz), 55.4. HRMS (ESI) calcd for  $\text{C}_{13}\text{H}_{17}\text{F}_3\text{NO}_4\text{S}$  ( $\text{M}+\text{NH}_4$ ) $^+$ : 340.0825, found: 340.0829.

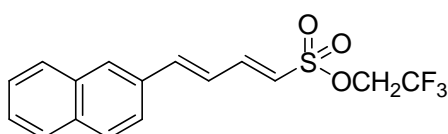

(0.27 g; 50% yield).  $^1\text{H}$  NMR (300MHz,  $\text{CDCl}_3$ ):  $\delta$  7.74-7.71 (m, 4H), 7.51-7.31 (m, 4H), 7.03 (d,  $J_{\text{HH}} = 15.0$  Hz, 1H, olefin), 6.84-6.75 (m, 1H, olefin), 6.25 (d,  $J_{\text{HH}} = 15.0$  Hz, 1H, olefin), 4.34 (q,  $J_{\text{HF}} = 7.8$  Hz, 2H,  $\text{OCH}_2$ ).  $^{13}\text{C}$  NMR (75 MHz,  $\text{CDCl}_3$ ):  $\delta$  146.7, 145.1, 134.2, 133.4, 132.5, 129.6, 128.9, 128.6, 127.9, 127.5, 127.0, 123.3, 123.0, 122.2, 122.3 (q,  $J_{\text{CF}} = 277.8$  Hz), 64.6 (q,  $J_{\text{CF}} = 37.4$  Hz). HRMS (ESI) calcd for  $\text{C}_{16}\text{H}_{17}\text{F}_3\text{NO}_3\text{S}$  ( $\text{M}+\text{NH}_4$ ) $^+$ : 360.0876, found: 360.0879.

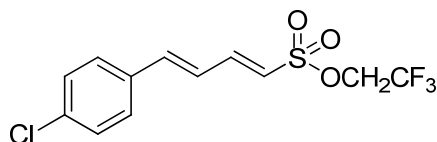

(0.38 g; 72% yield).  $^1\text{H}$  NMR (300MHz,  $\text{CDCl}_3$ ):  $\delta$  7.35-7.46 (m, 5H), 7.01 (d,  $J_{\text{HH}} = 15.0$  Hz, 1H, olefin), 6.78-6.86 (m, 1H, olefin), 6.38 (d,  $J_{\text{HH}} = 15.0$  Hz, 1H, olefin), 4.43 (q,  $J_{\text{HF}} = 7.8$  Hz, 2H,  $\text{OCH}_2$ ).  $^{13}\text{C}$  NMR (75 MHz,  $\text{CDCl}_3$ ):  $\delta$  146.2, 143.5, 136.2, 133.5, 129.4, 129.0, 123.3, 122.1 (q,  $J_{\text{CF}} = 277.9$  Hz), 121.9, 64.7 (q,  $J_{\text{CF}} = 38.0$  Hz). HRMS (ESI) calcd for  $\text{C}_{12}\text{H}_{14}\text{ClF}_3\text{NO}_3\text{S}$  ( $\text{M}+\text{NH}_4$ ) $^+$ : 344.0330, found: 344.0331.

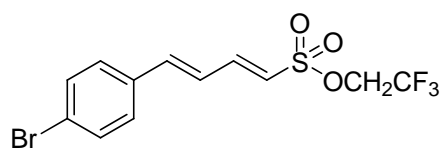

(0.36 g; 61% yield).  $^1\text{H}$  NMR (300MHz,  $\text{CDCl}_3$ ):  $\delta$  7.54-7.51 (m, 2H), 7.45-7.34 (m, 3H), 6.99 (d,  $J_{\text{HH}} = 15.0$  Hz, 1H, olefin), 6.88-6.79 (m, 1H, olefin), 6.38 (d,  $J_{\text{HH}} = 15.0$  Hz, 1H, olefin), 4.43 (q,  $J_{\text{HF}} = 7.8$  Hz, 2H,  $\text{OCH}_2$ ).  $^{13}\text{C}$  NMR (75 MHz,  $\text{CDCl}_3$ ):  $\delta$  146.1, 143.5, 133.9, 132.4, 129.2, 124.6, 123.4, 122.1 (q,  $J_{\text{CF}} = 277.9$  Hz), 122.1, 64.7 (q,  $J_{\text{CF}} = 38.0$  Hz). HRMS (ESI) calcd for  $\text{C}_{12}\text{H}_{10}\text{BrF}_3\text{NaO}_3\text{S}$  ( $\text{M}+\text{Na}$ ) $^+$ : 392.9378, found: 392.9362.

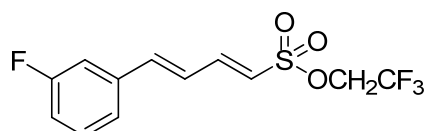

(0.35 g; 77% yield).  $^1\text{H}$  NMR (300MHz,  $\text{CDCl}_3$ ):  $\delta$  7.46-7.33 (m, 2H), 7.27-7.17 (m, 2H), 7.10-6.98 (m, 2H), 6.88-6.79 (m, 1H, olefin), 6.40 (d,  $J_{\text{HH}} = 15.0$  Hz, 1H, olefin), 4.44 (q,  $J_{\text{HF}} = 7.8$  Hz, 2H,  $\text{OCH}_2$ ).  $^{13}\text{C}$  NMR (75 MHz,  $\text{CDCl}_3$ ):  $\delta$  163.1 (d,  $J_{\text{CF}} = 247.1$  Hz), 145.9, 143.4 (d,  $J_{\text{CF}} = 2.9$  Hz), 137.2 (d,  $J_{\text{CF}} = 8.0$  Hz), 130.7 (d,  $J_{\text{CF}} = 8.4$  Hz), 124.0, 123.8 (d,  $J_{\text{CF}} = 2.8$  Hz), 122.4, 122.1 (q,  $J_{\text{CF}} = 278.3$  Hz), 117.1 (d,  $J_{\text{CF}} = 21.2$  Hz), 114.0 (d,  $J_{\text{CF}} = 22.4$  Hz), 64.7 (q,  $J_{\text{CF}} = 38.0$  Hz). HRMS (ESI) calcd for  $\text{C}_{12}\text{H}_{14}\text{F}_4\text{NO}_3\text{S}$  ( $\text{M}+\text{NH}_4$ ) $^+$ : 328.0625, found: 328.0631.

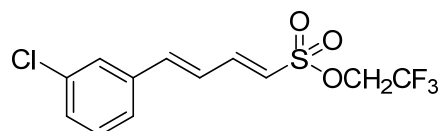

(0.6 g; 69% yield).  $^1\text{H}$  NMR (300MHz,  $\text{CDCl}_3$ ):  $\delta$  7.47-7.34 (m, 5H), 6.98 (d,  $J_{\text{HH}} = 15.0$  Hz, 1H, olefin), 6.88-6.80 (m, 1H, olefin), 6.40 (d,  $J_{\text{HH}} = 15.0$  Hz, 1H, olefin), 4.40 (q,  $J_{\text{HF}} = 8.1$  Hz, 2H,  $\text{OCH}_2$ ).  $^{13}\text{C}$  NMR (75 MHz,  $\text{CDCl}_3$ ):  $\delta$  145.9, 143.1, 136.8, 135.1, 130.4, 130.1, 127.5, 126.0, 124.1, 122.5, 122.1 (q,  $J_{\text{CF}} = 277.9$  Hz), 64.7 (q,  $J_{\text{CF}} = 38.0$  Hz). HRMS (ESI) calcd for  $\text{C}_{12}\text{H}_{14}\text{ClF}_3\text{NO}_3\text{S}$  ( $\text{M}+\text{NH}_4$ ) $^+$ : 344.0330, found: 344.0333.

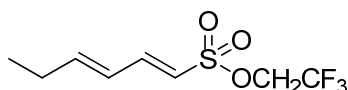

(0.23 g; 60% yield).  $^1\text{H}$  NMR (300MHz,  $\text{CDCl}_3$ ):  $\delta$  7.30-7.22 (m, 1H, olefin), 6.45-6.35 (m, 1H, olefin), 6.24-6.16 (m, 2H, olefin), 4.39 (q,  $J_{\text{HF}} = 7.8$  Hz, 2H,  $\text{OCH}_2$ ), 2.31-2.22 (m, 2H,  $=\text{CCH}_2$ ), 1.08 (t,  $J_{\text{HH}} = 7.5$  Hz, 3H, Me).  $^{13}\text{C}$  NMR (75 MHz,  $\text{CDCl}_3$ ):  $\delta$  151.4, 147.3, 124.5, 120.8, 122.1 (q,  $J_{\text{CF}} = 208.5$  Hz), 64.4 (q,  $J_{\text{CF}} = 28.3$  Hz), 26.1, 12.3. HRMS (ESI) calcd for  $\text{C}_8\text{H}_{12}\text{F}_3\text{O}_3\text{S}$  ( $\text{M}+\text{H}$ ) $^+$ : 245.0454, found: 245.0452.

The substrate **1f** was prepared from the corresponding acyl chloride with hexafluoro isopropanol in the presence of  $\text{Et}_3\text{N}$  following the literature procedure.

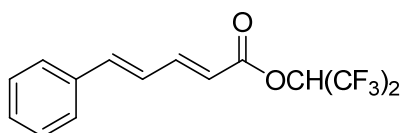

71% yield.  $^1\text{H}$  NMR (300MHz,  $\text{CDCl}_3$ ):  $\delta$  7.66 (dd,  $J_{\text{HH}} = 15.3$  and 10.2 Hz, 1H, olefin), 7.53-7.50 (m, 2H, Ar), 7.46-7.40 (m, 3H, Ar), 7.02-6.85 (m, 2H, olefin), 6.06 (q,  $J_{\text{HH}} = 15.3$  Hz, 1H, olefin), 6.08-5.98 (m, 1H, OCH).  $^{13}\text{C}$  NMR (75 MHz,  $\text{CDCl}_3$ ):  $\delta$  163.5, 149.1, 143.4, 135.7, 129.9, 129.0, 127.7, 125.5, 122.7, 120.9 (q,  $J_{\text{CF}} = 282.9$  Hz), 116.9, 66.6 (sept,  $J_{\text{CF}} = 34.7$  Hz). MS (ESI): 324.8 ( $\text{M}^+$ ).

## References:

- (1) Feng, J.-J.; Chen, X.-F.; Shi, M.; Duan, W.-L. *J. Am. Chem. Soc.* **2010**, *132*, 5562.
- (2) Herseczki, Z.; Gergely, I.; Hegedüs, C.; Szöllösy, A.; Bakos, J. *Tetrahedron: Asymmetry* **2004**, *15*, 1673.
- (3) Y. M. Choi-Sledeski, R. Kearney, G. Poli, H. Pauls, C. Gardner, Y. Gong, M. Becker, R. Davis, A. Spada, G. Liang, V. Chu, K. Brown, D. Collussi, R. Leadley, Jr., S. Rebello, P. Moxey, S. Morgan, R. Bentley, C. Kasiewski, S. Maignan, J.-P. Guilloteau, V. Mikol, *J. Med. Chem.* **2003**, *46*, 681.
- (4) Du, D, Duan, W.-L. *Chem. Commun.* **2011**, *47*, 11101.
- (5) Du, D.; Lin, Z.-Q.; Lu, J.-Z.; Li, C.; Duan, W.-L. *Asian J. Org. Chem.* **2013**, *2*, 392.
- (6) Takaya, Y.; Ogasawara, M.; Hayashi, T.; Sakai, M.; Miyaura, N. *J. Am. Chem. Soc.* **1998**, *120*, 5579.



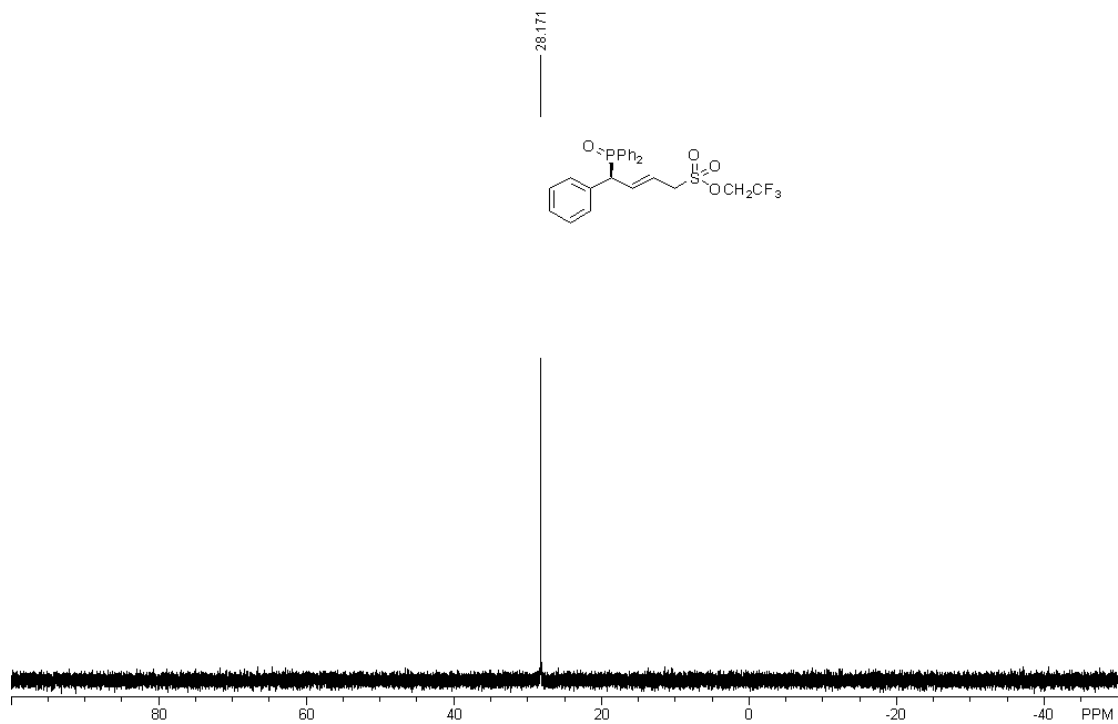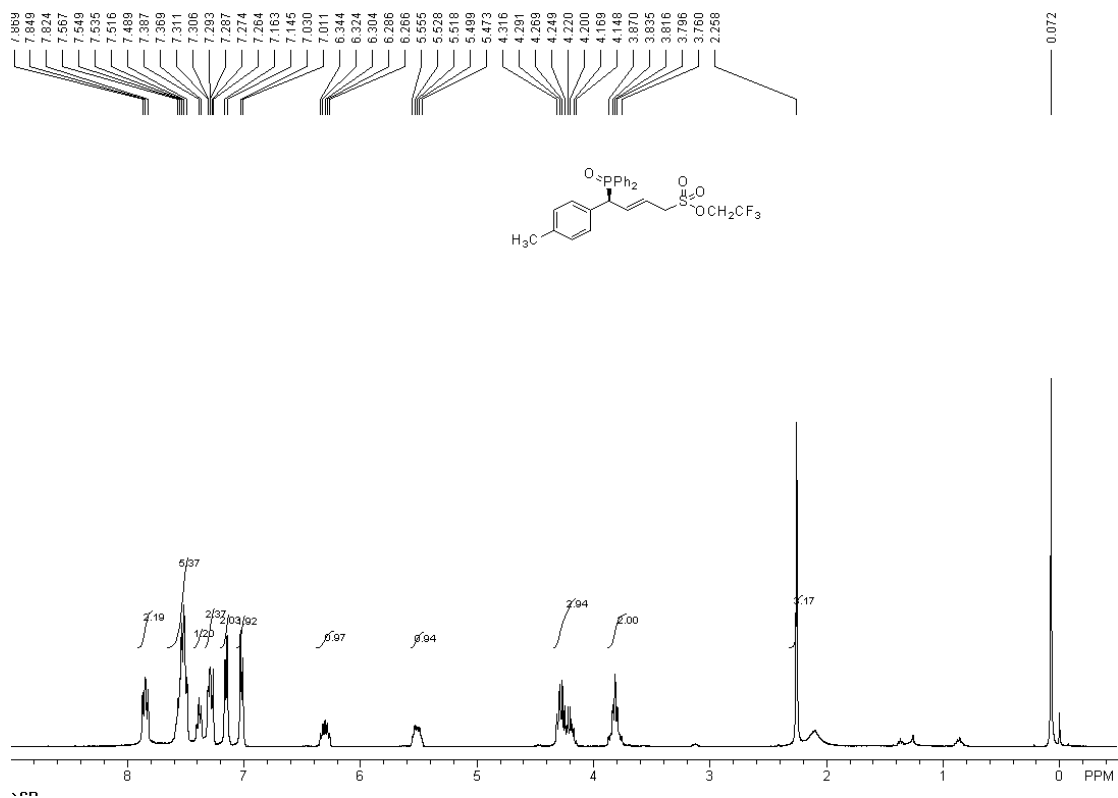

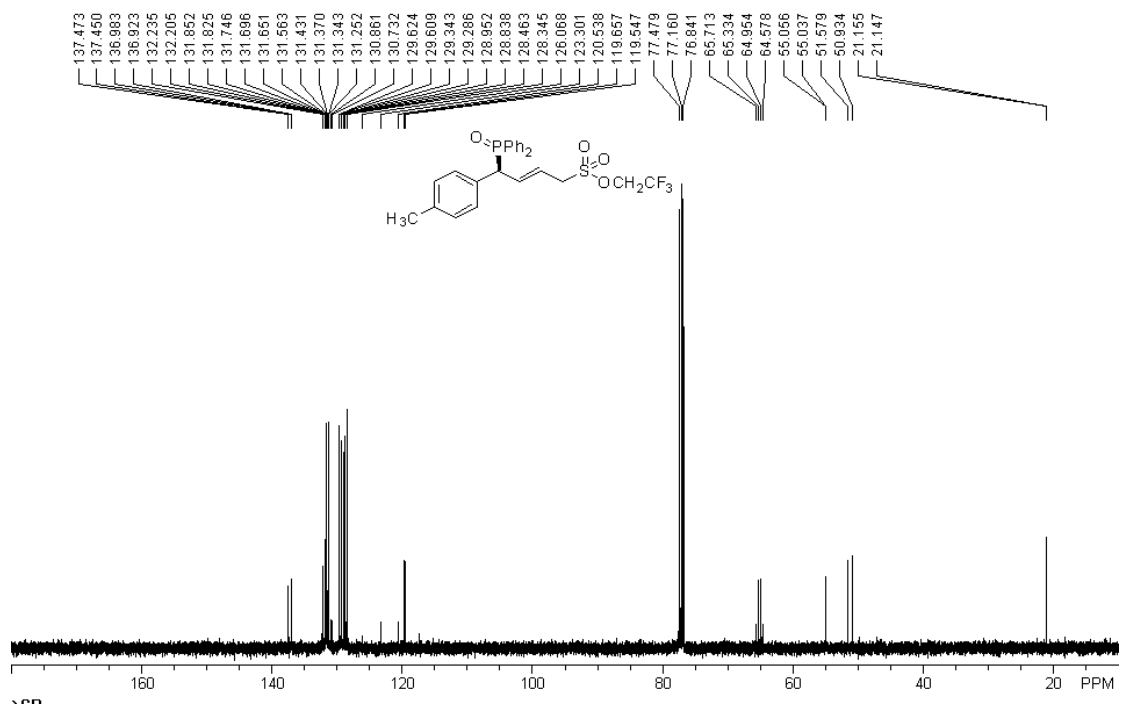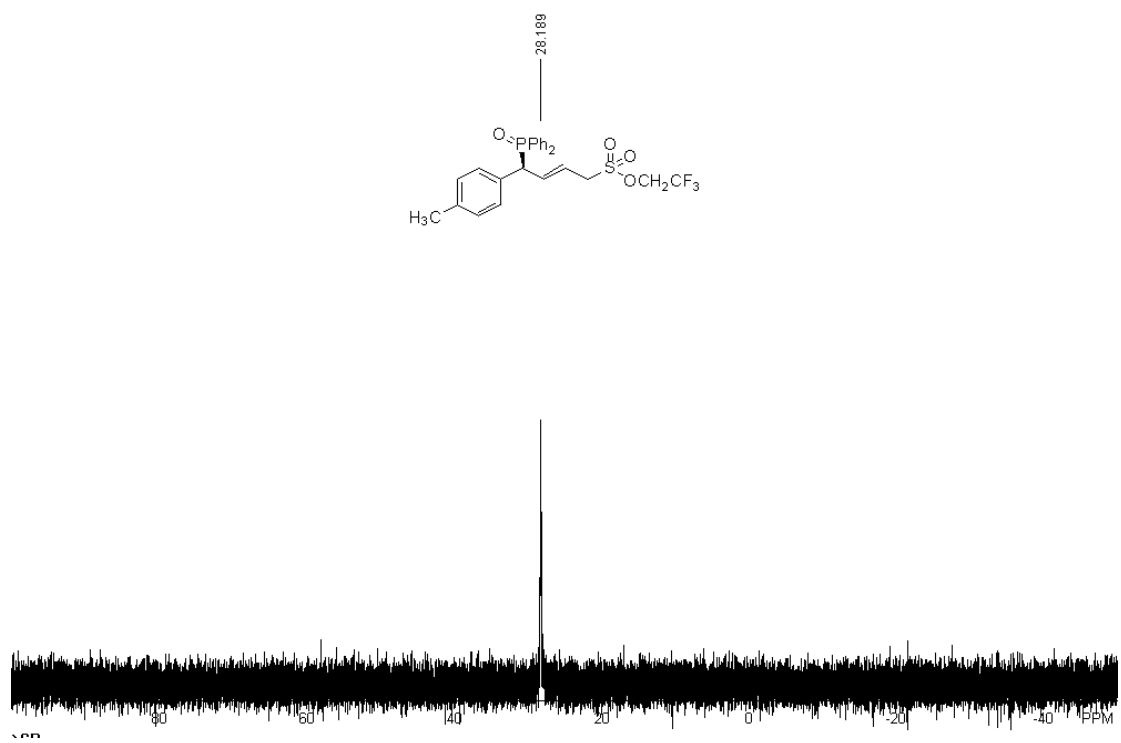

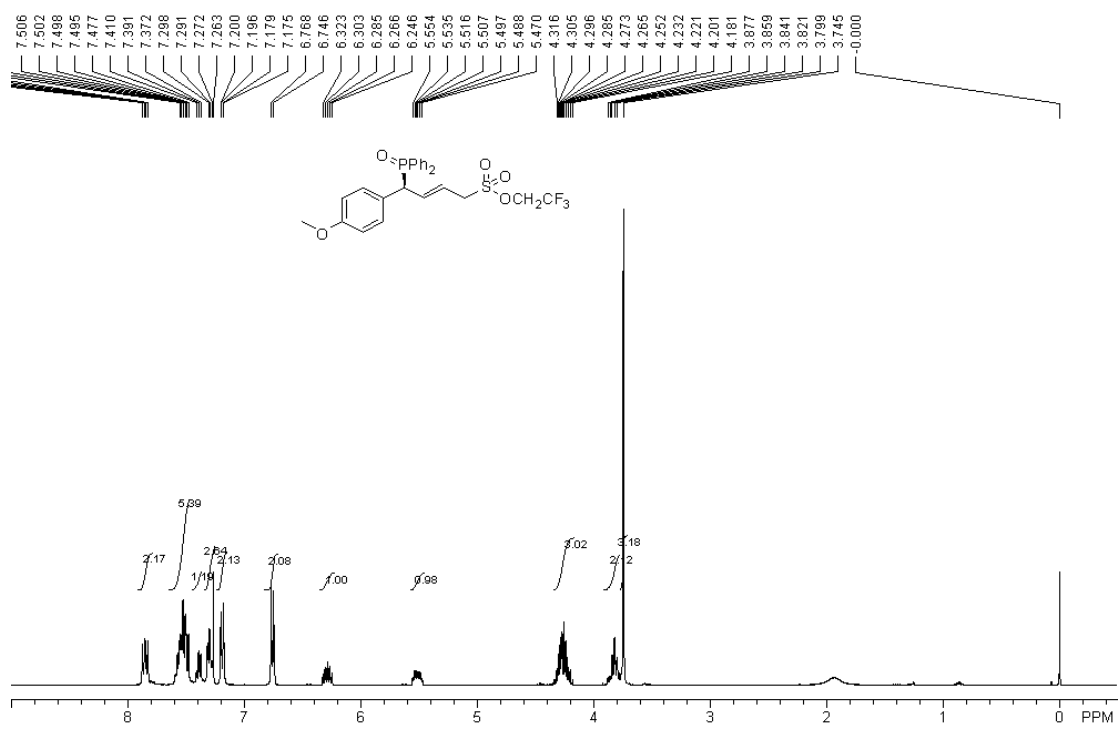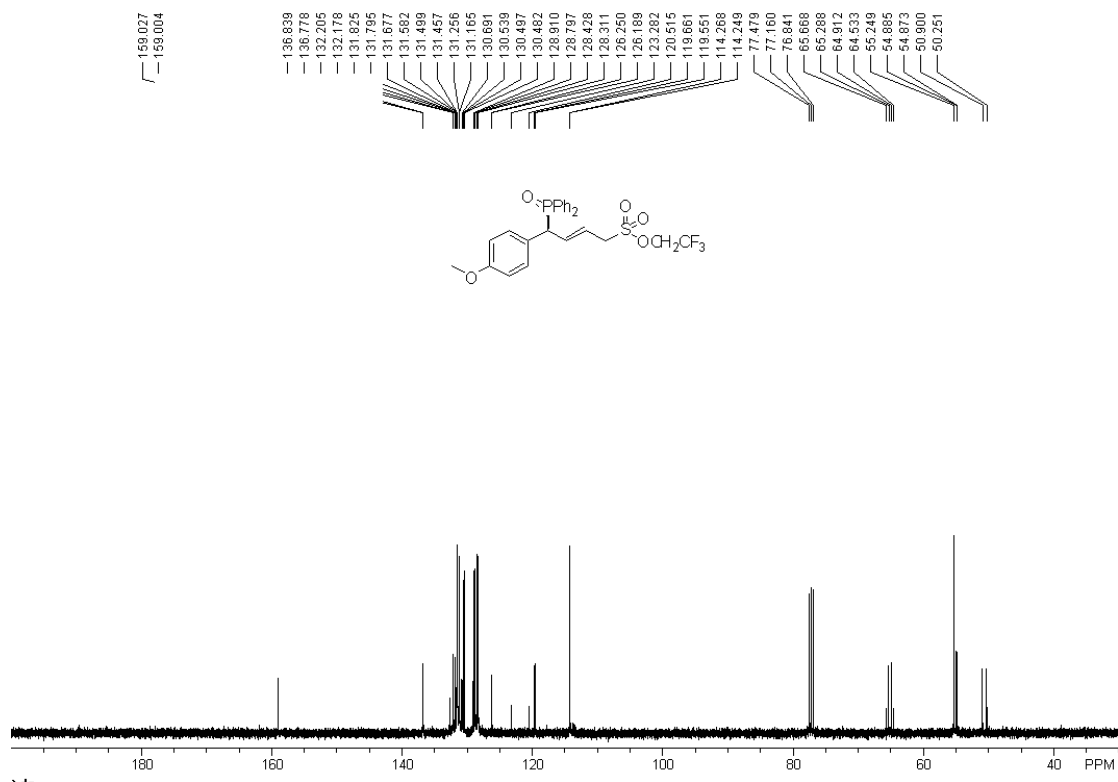

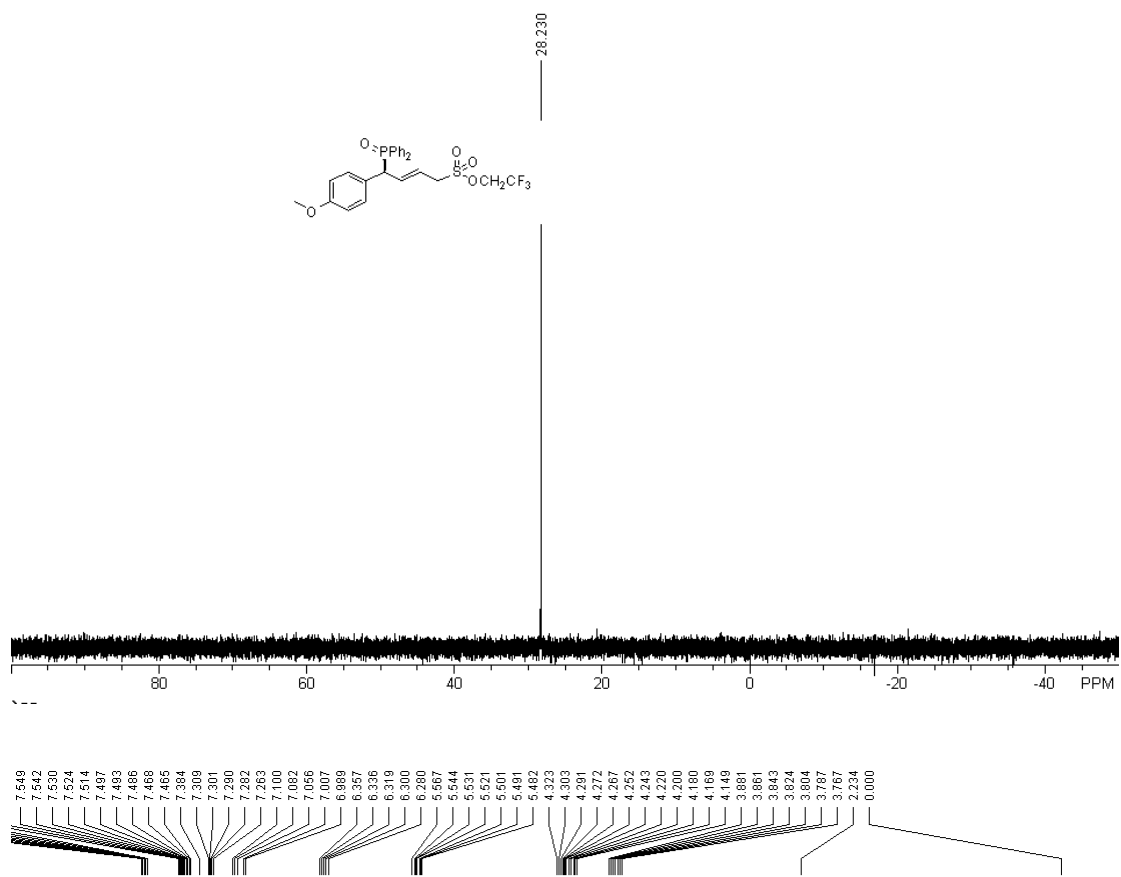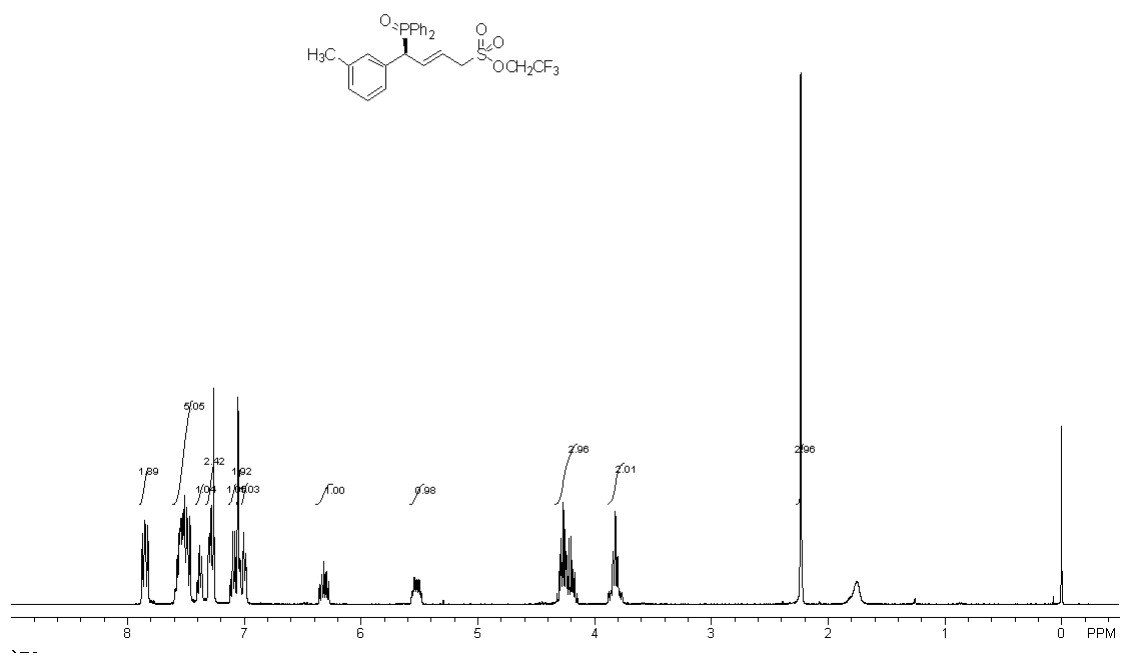

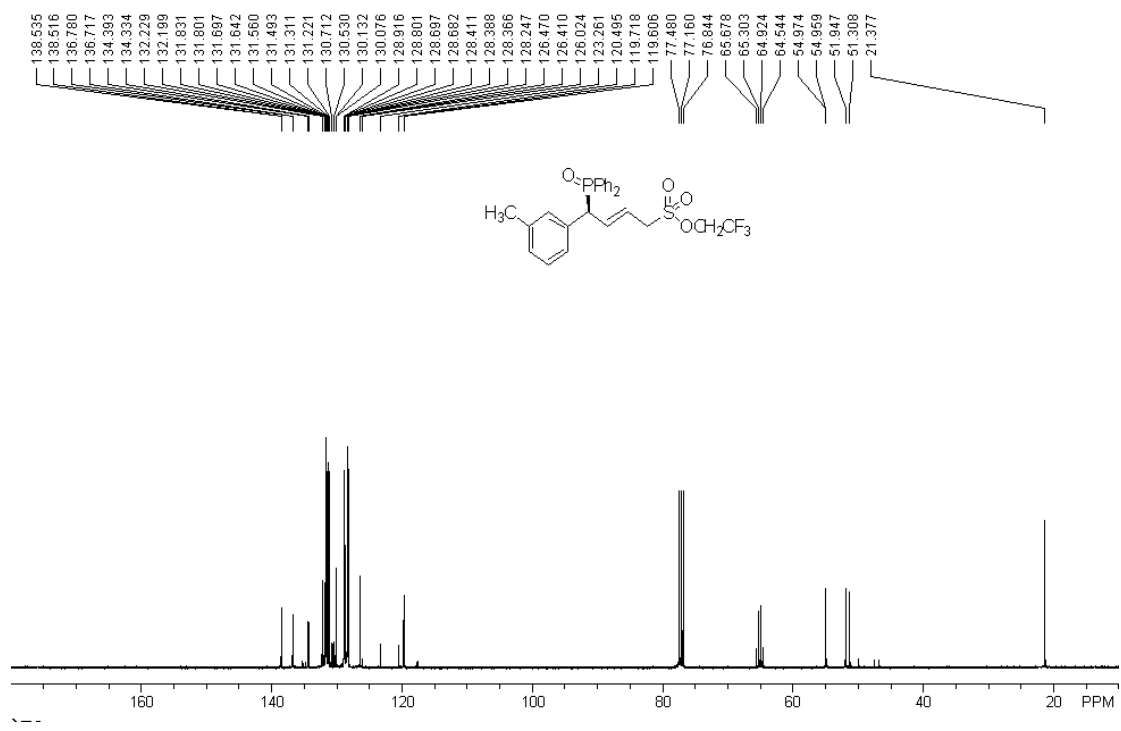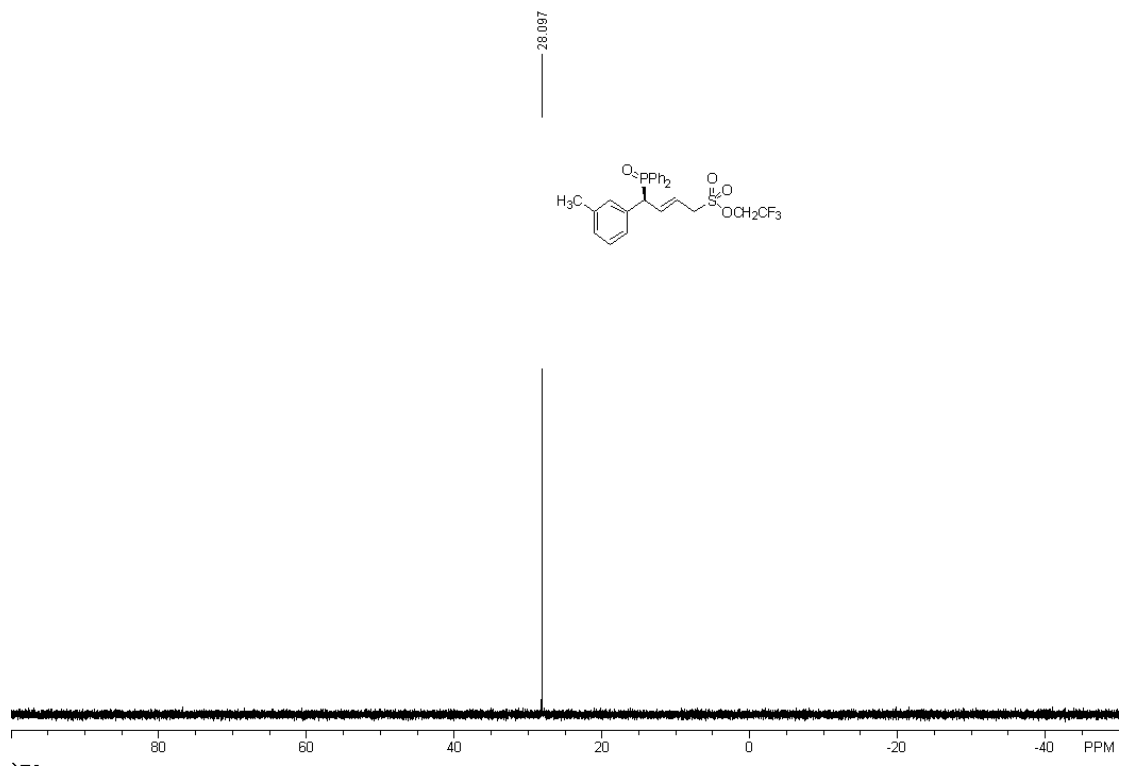

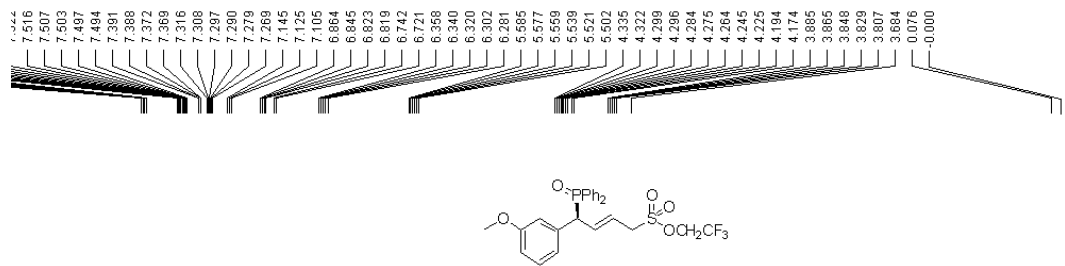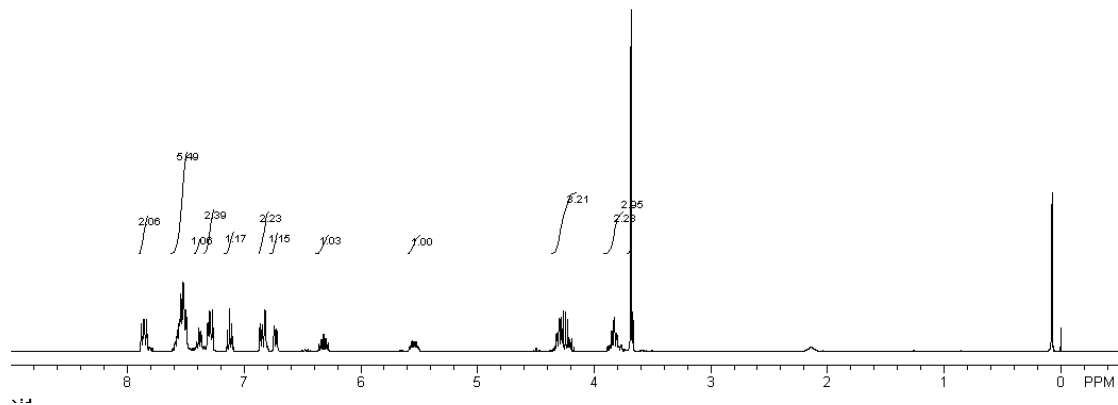

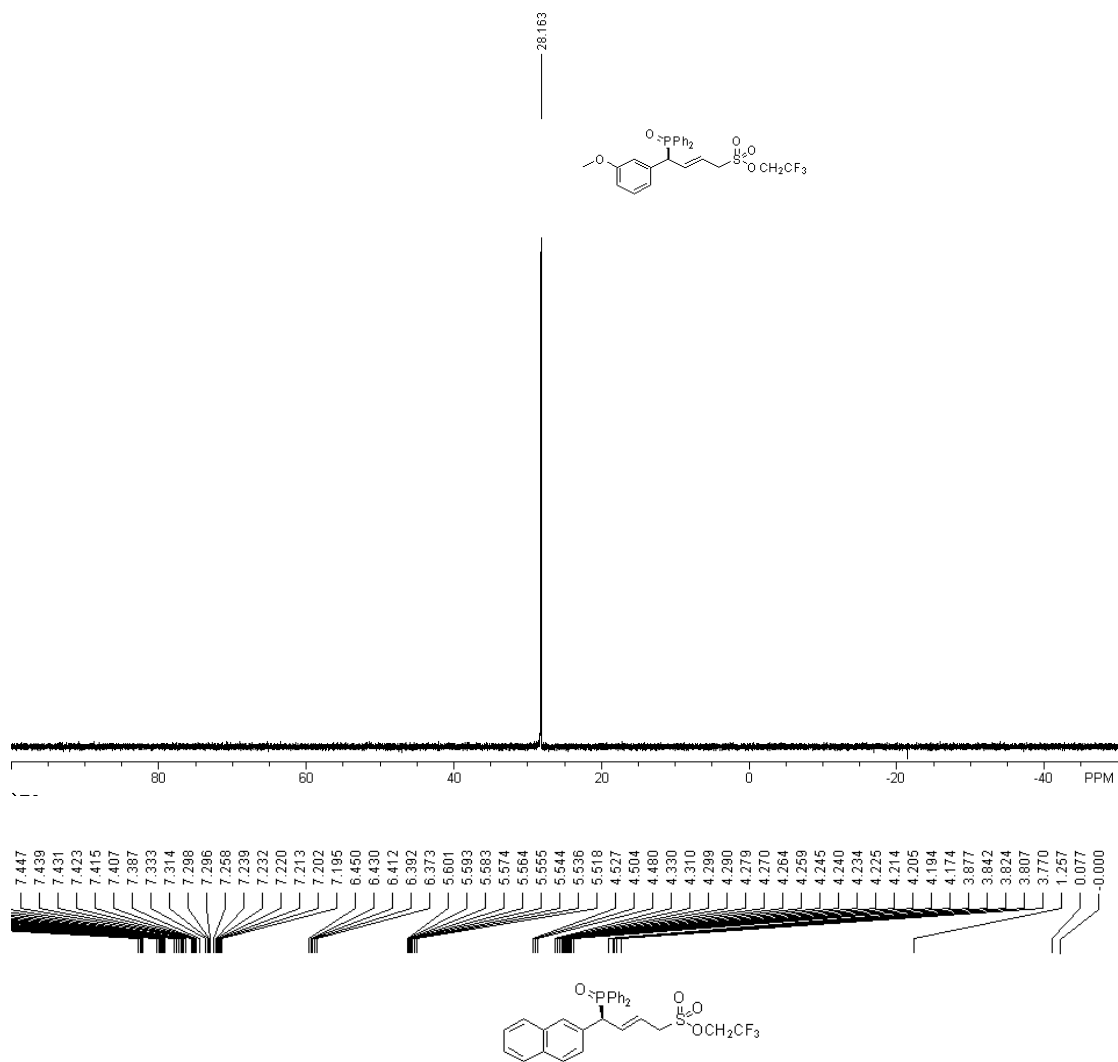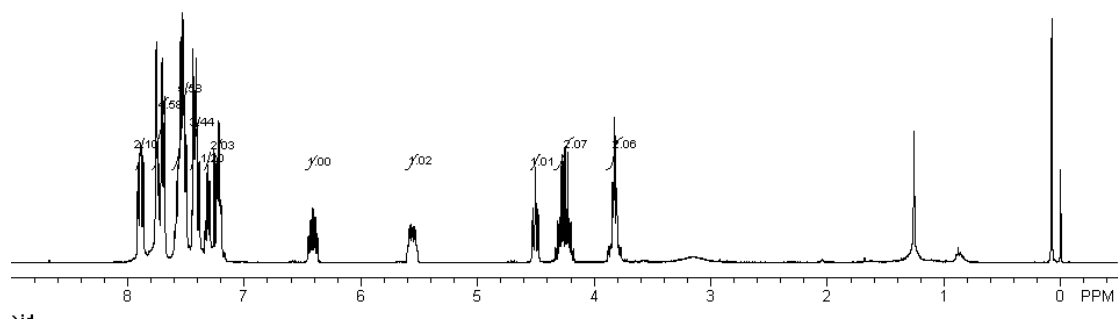

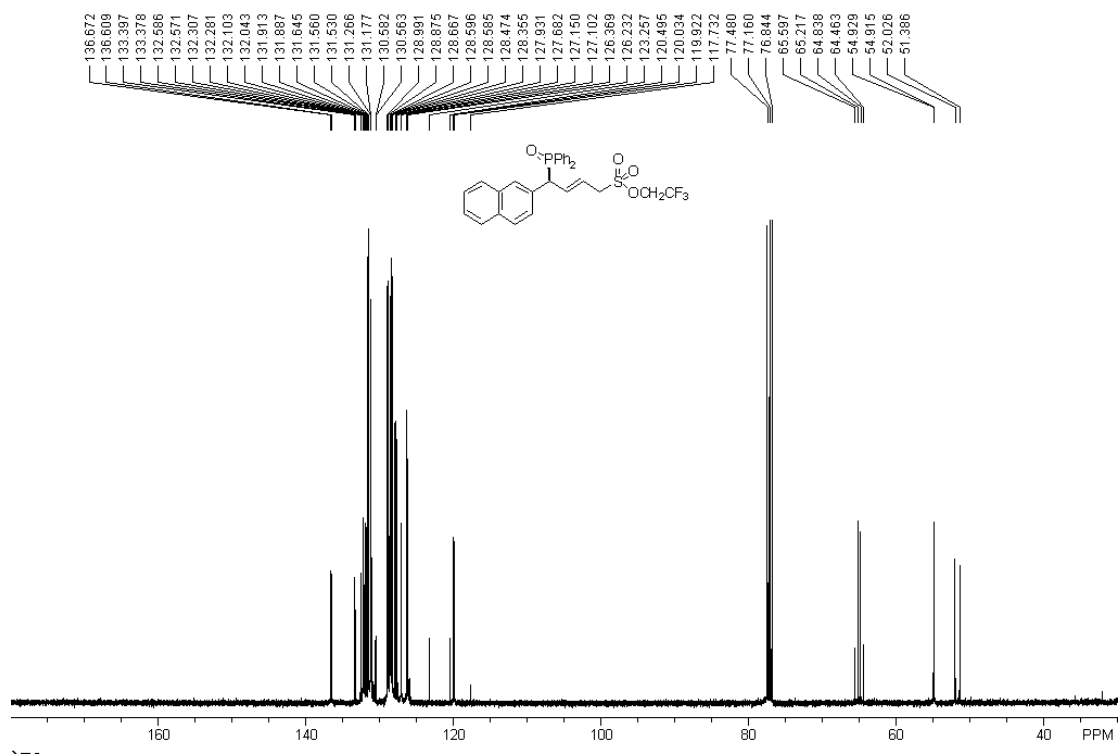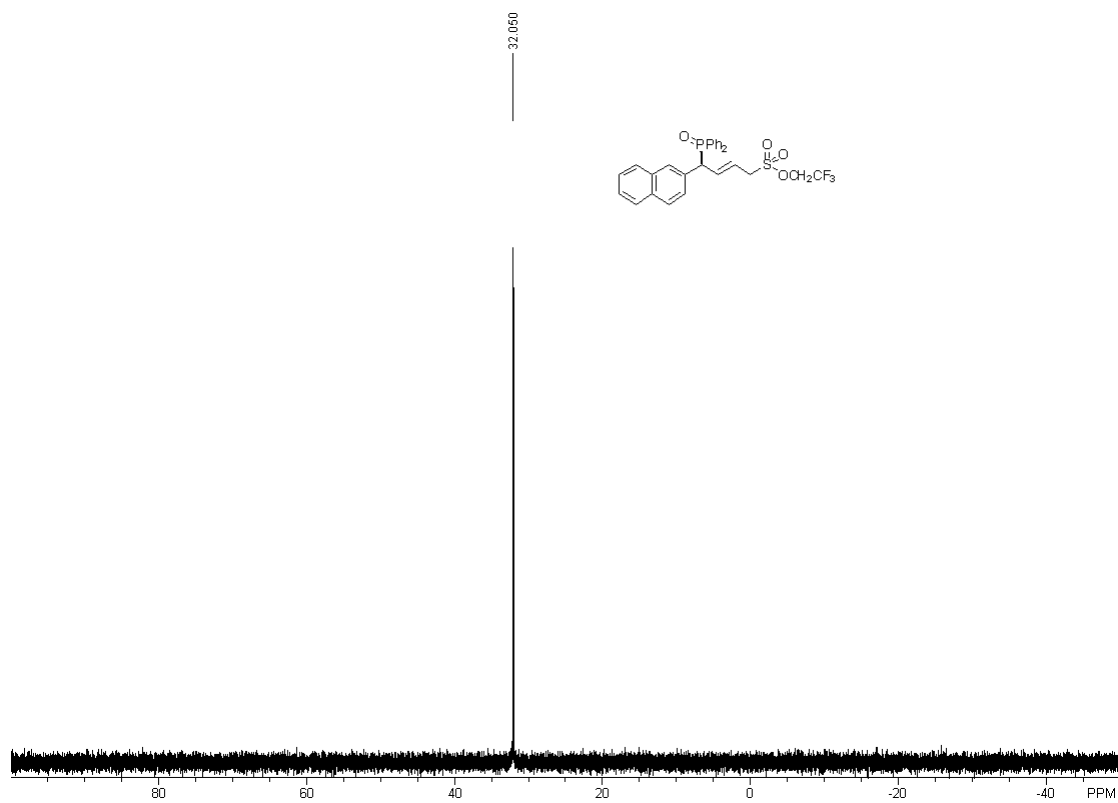

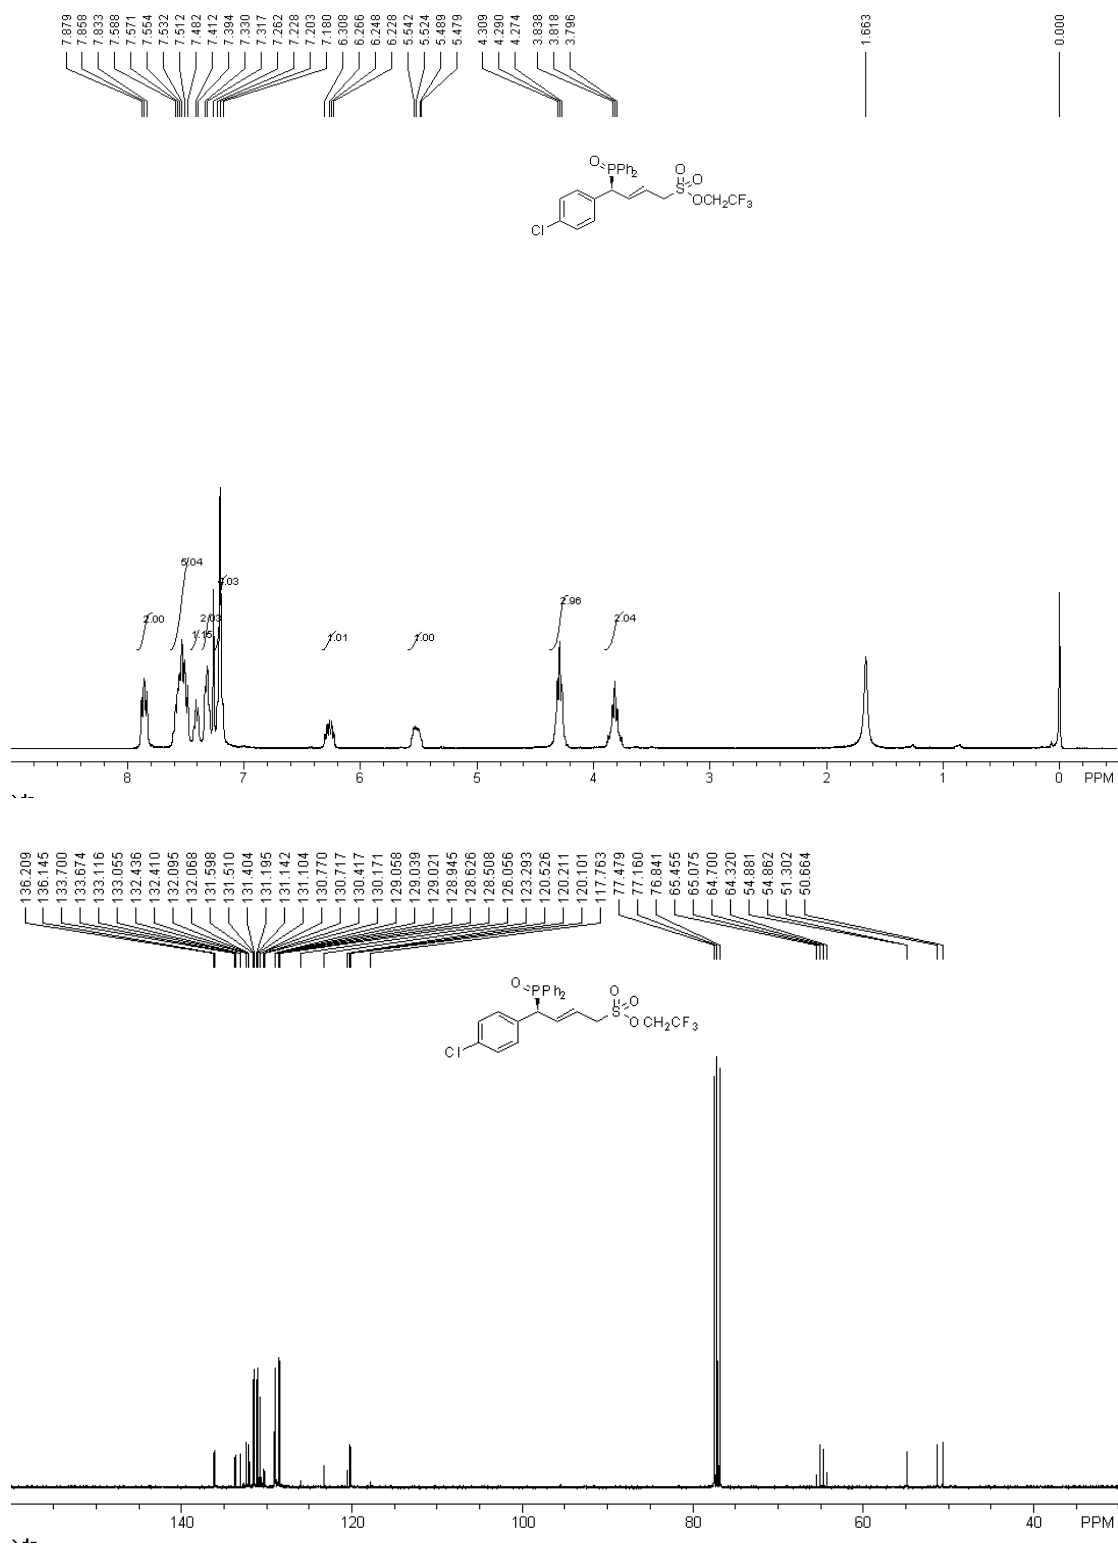

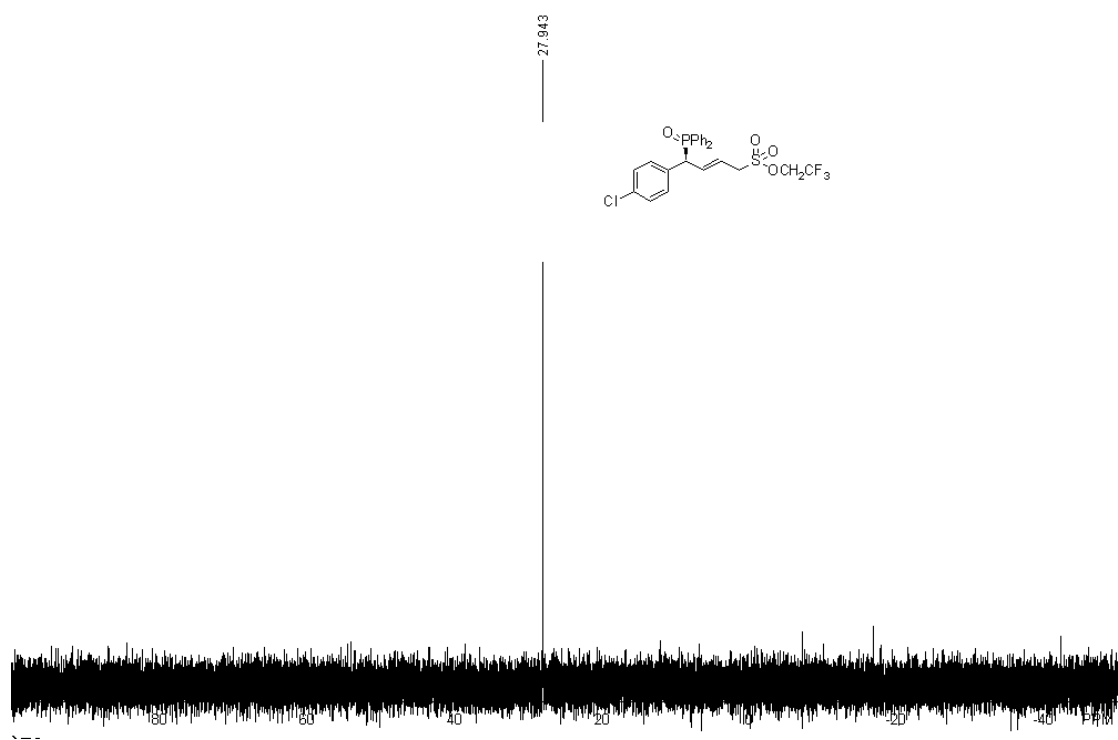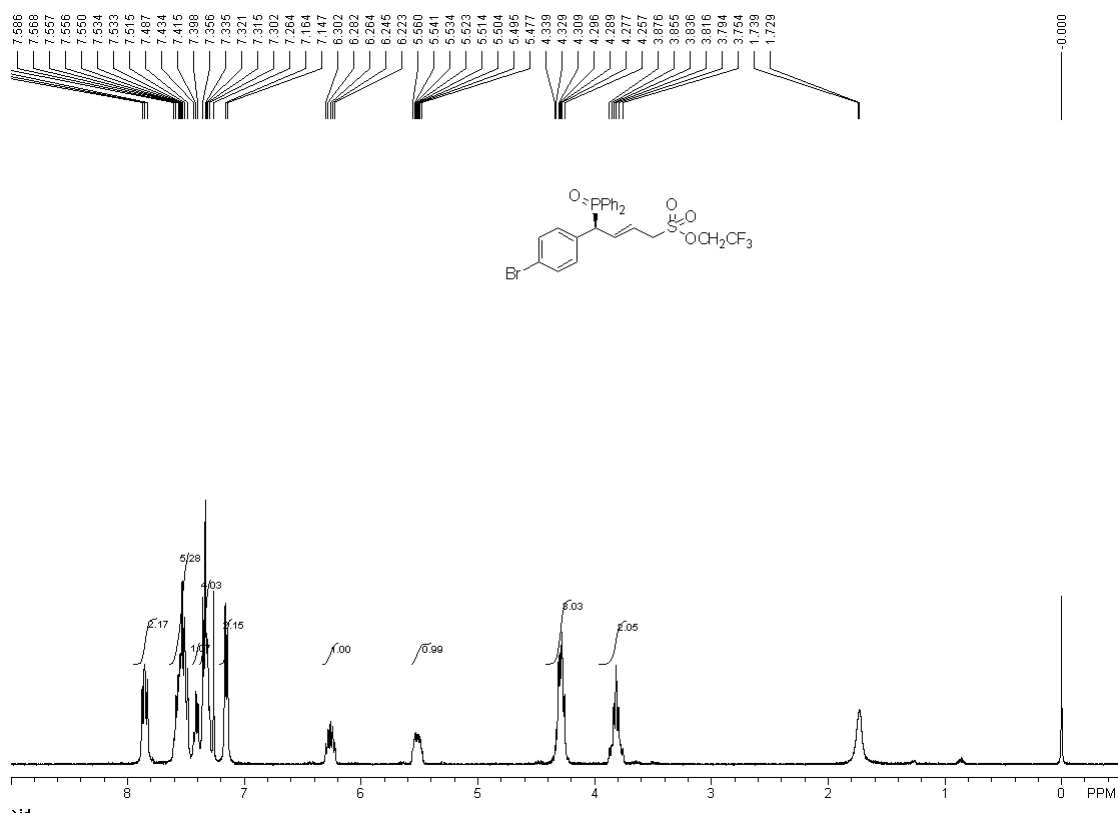

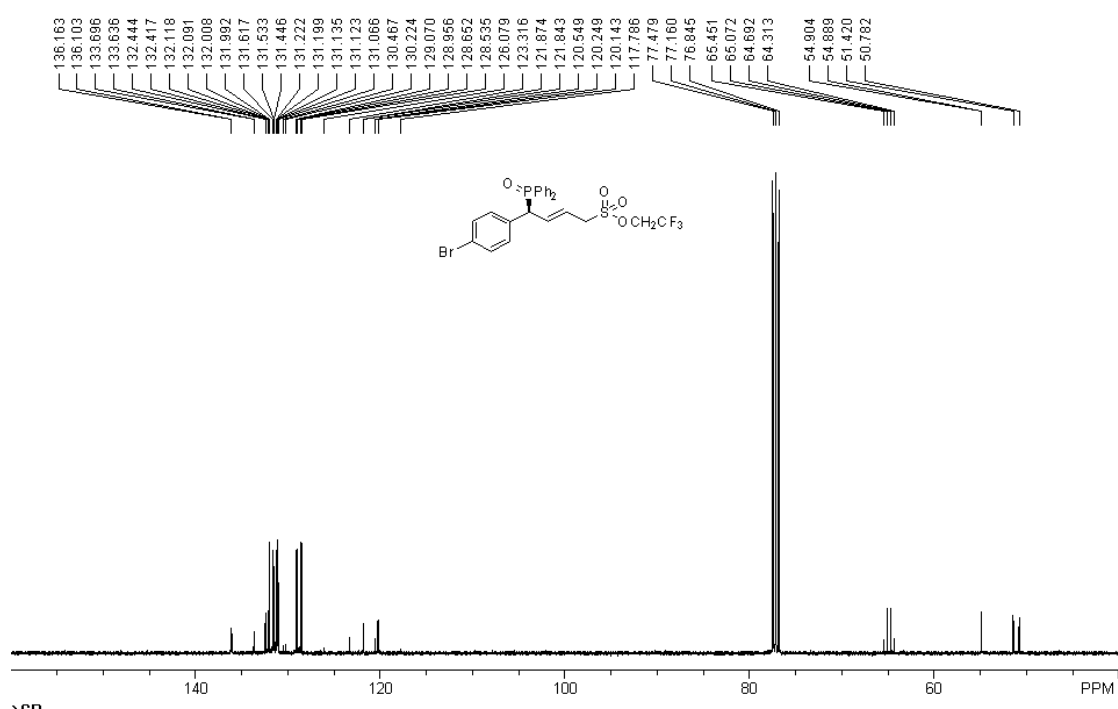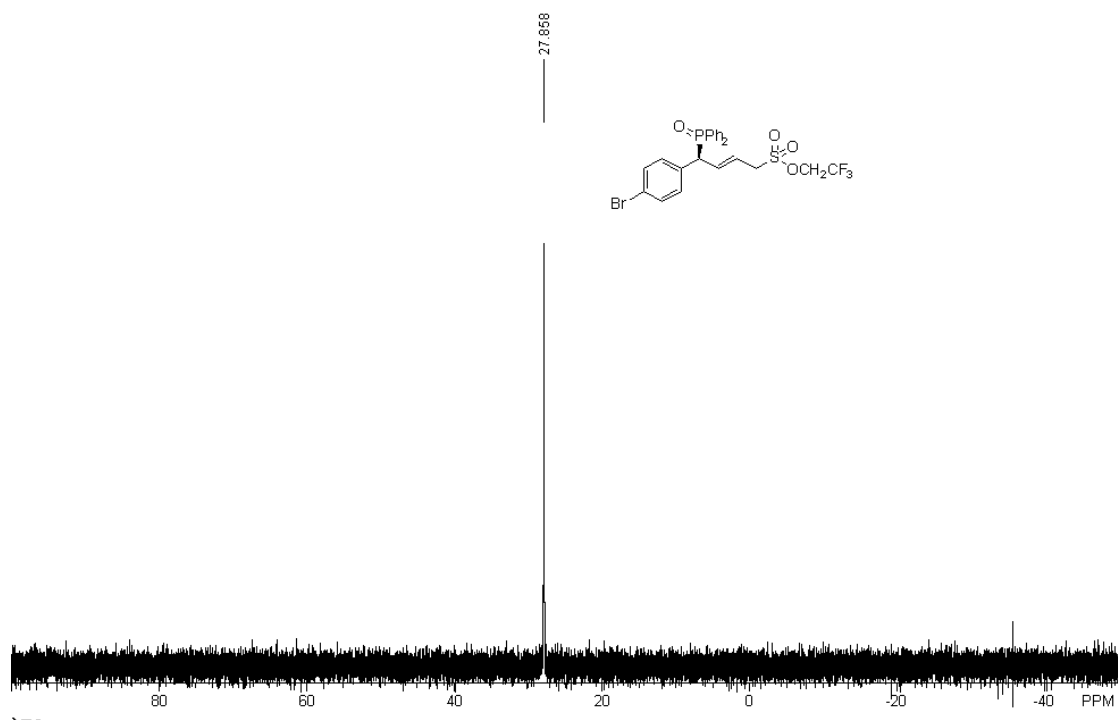

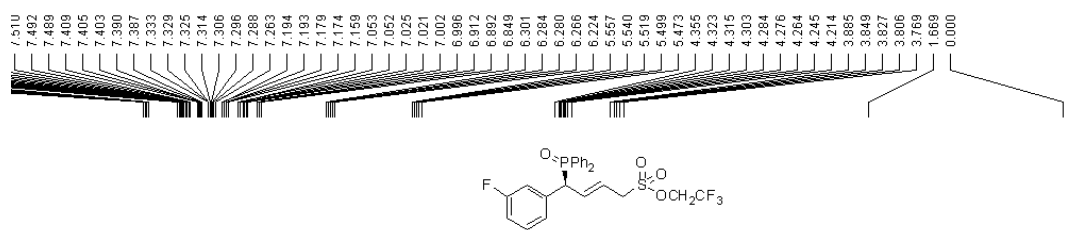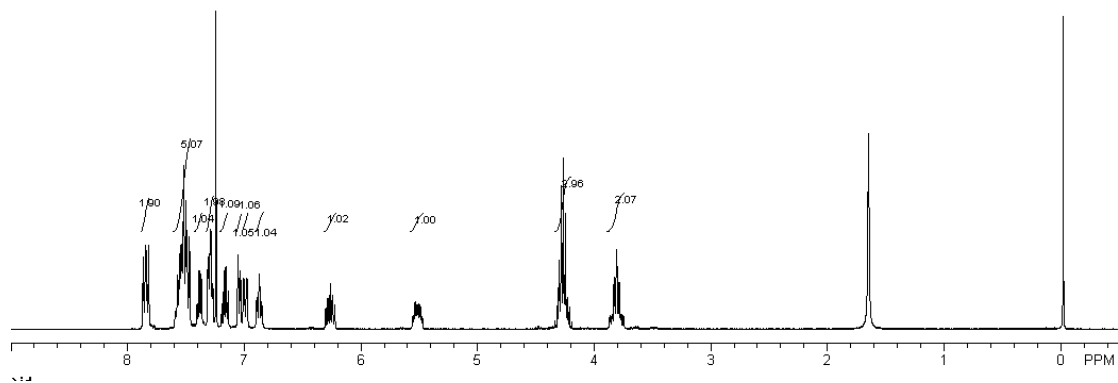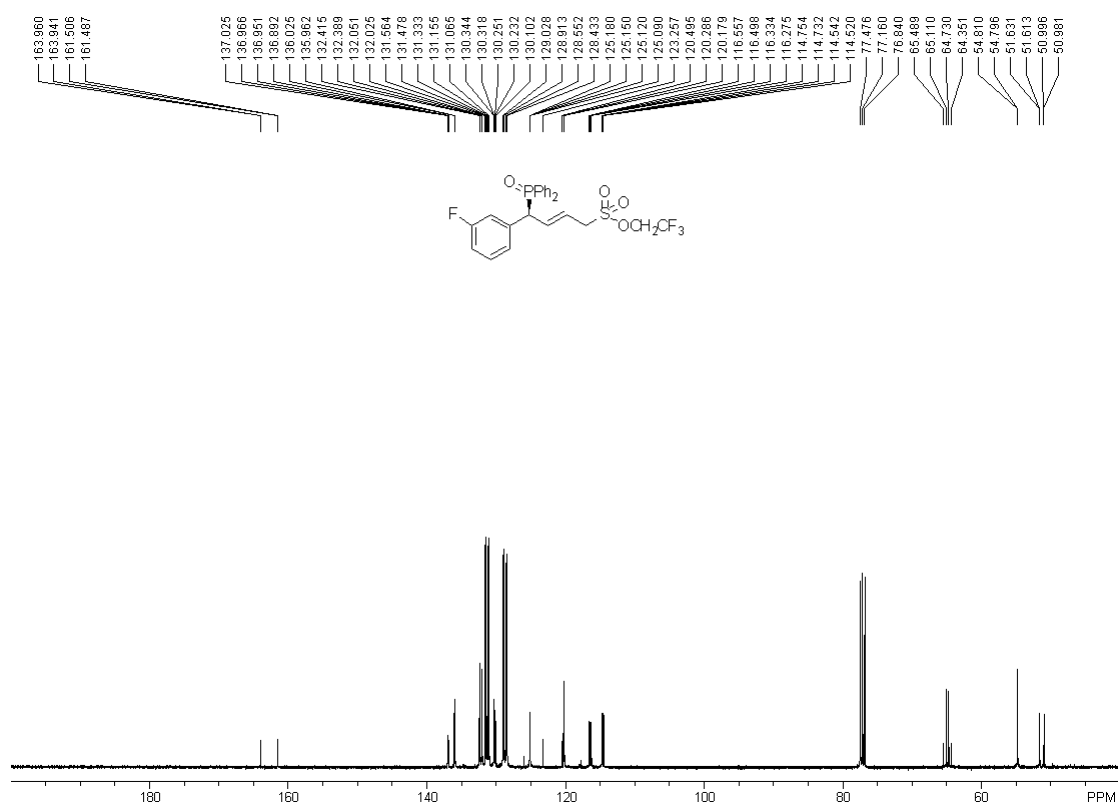

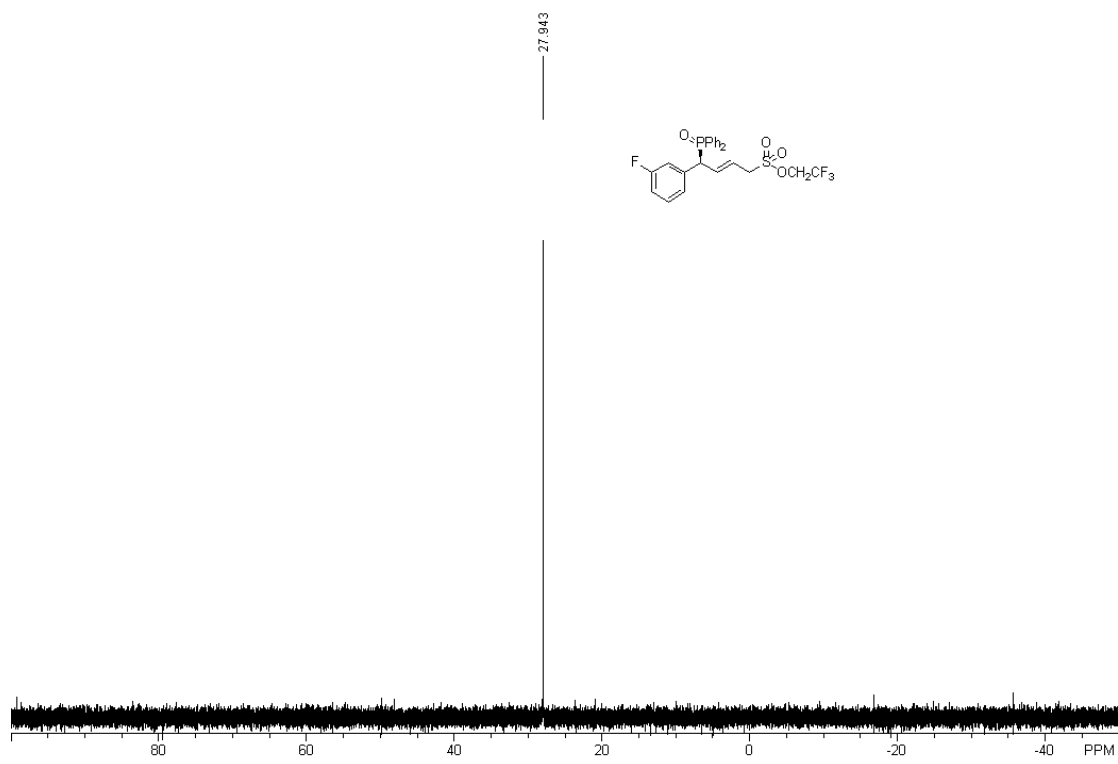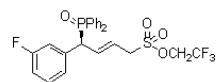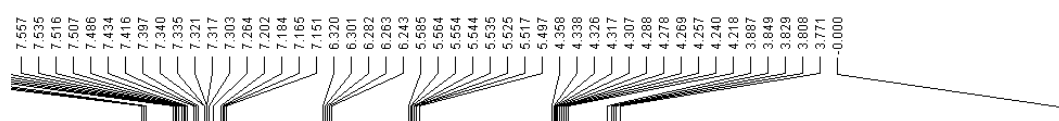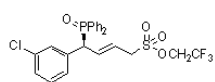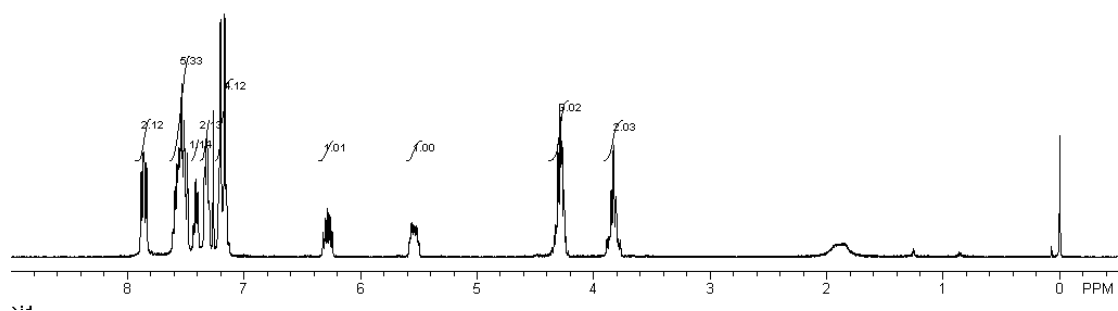

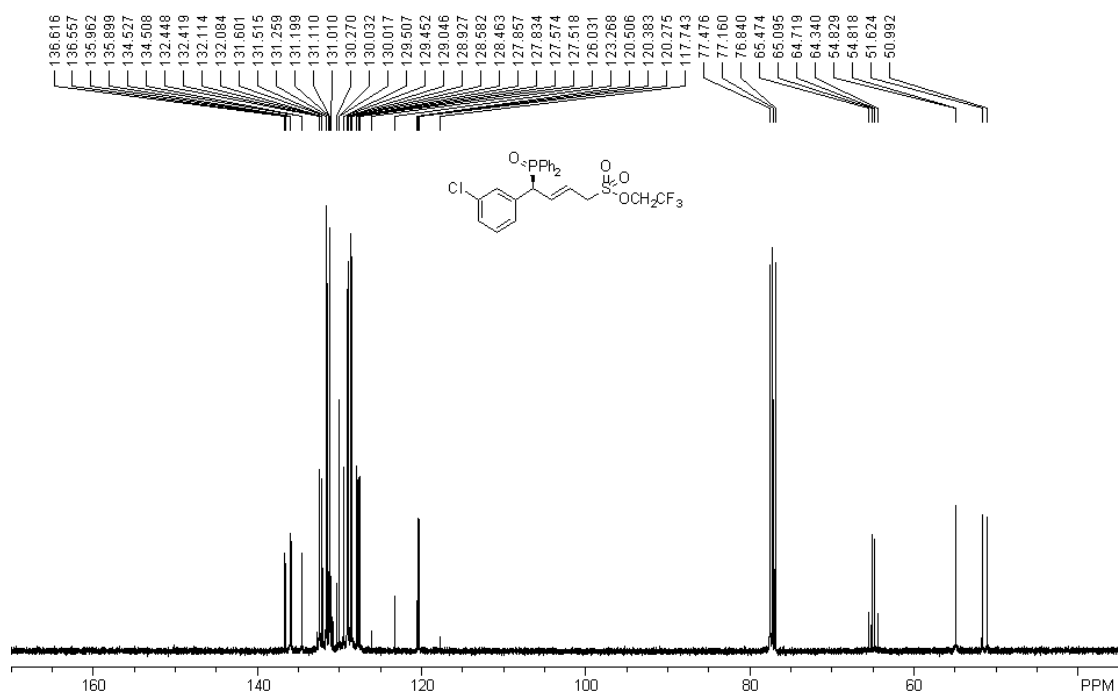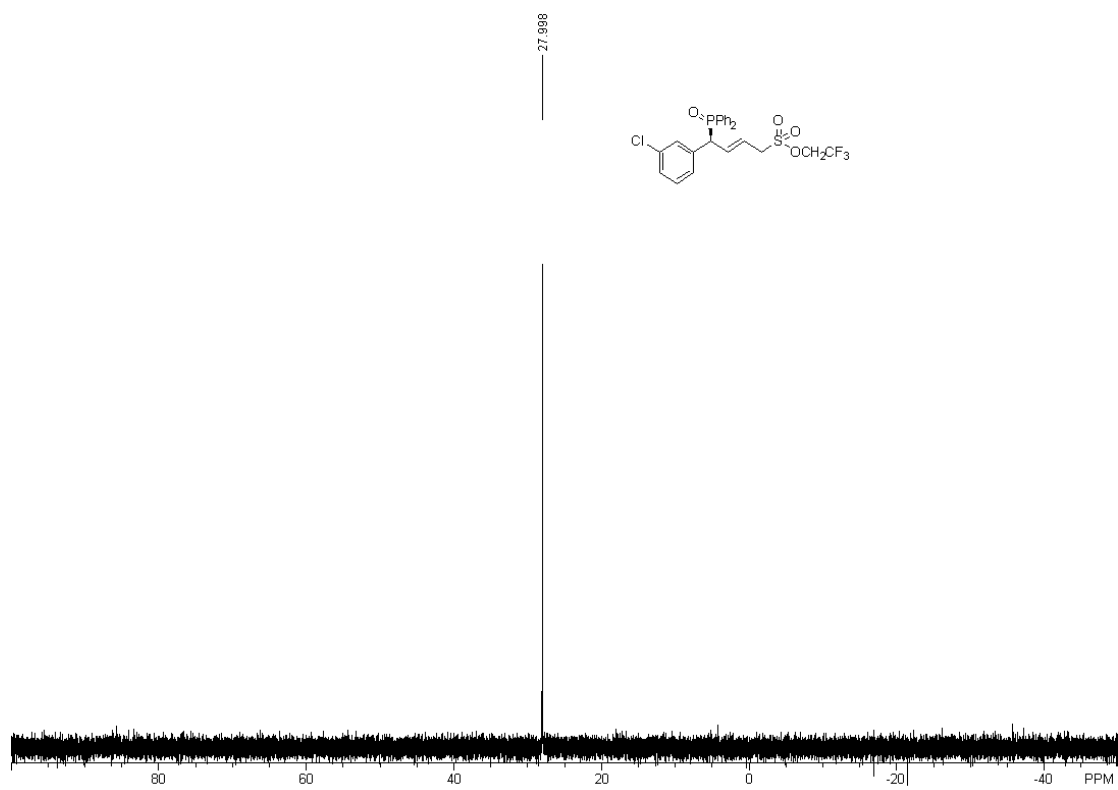

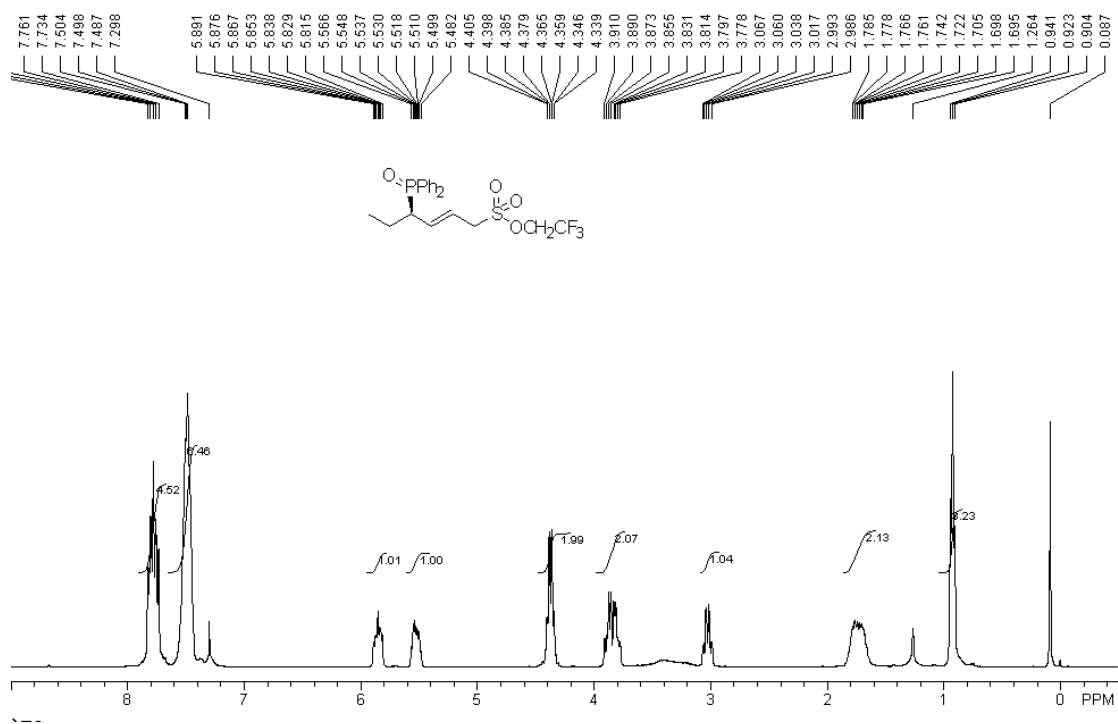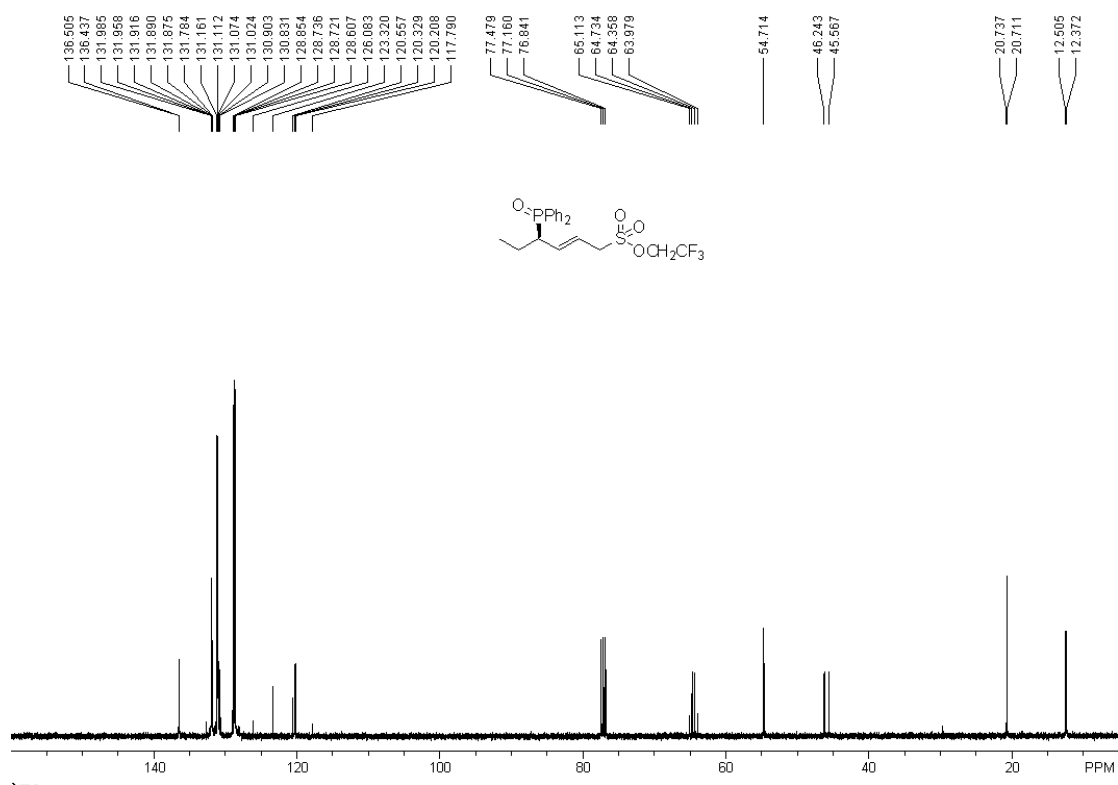

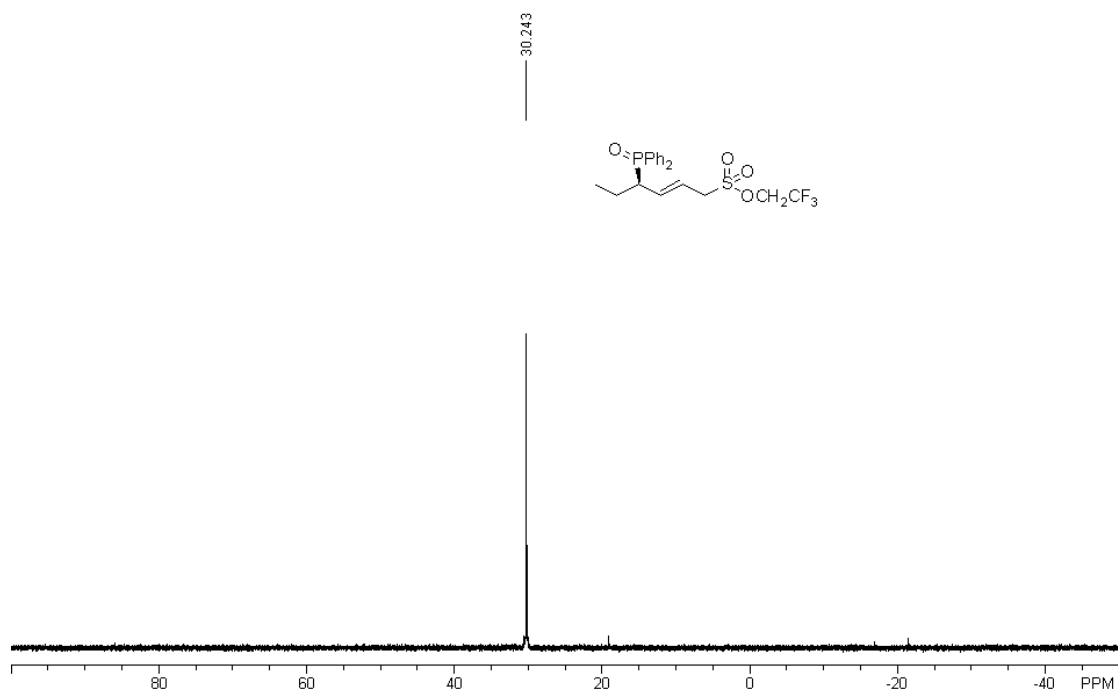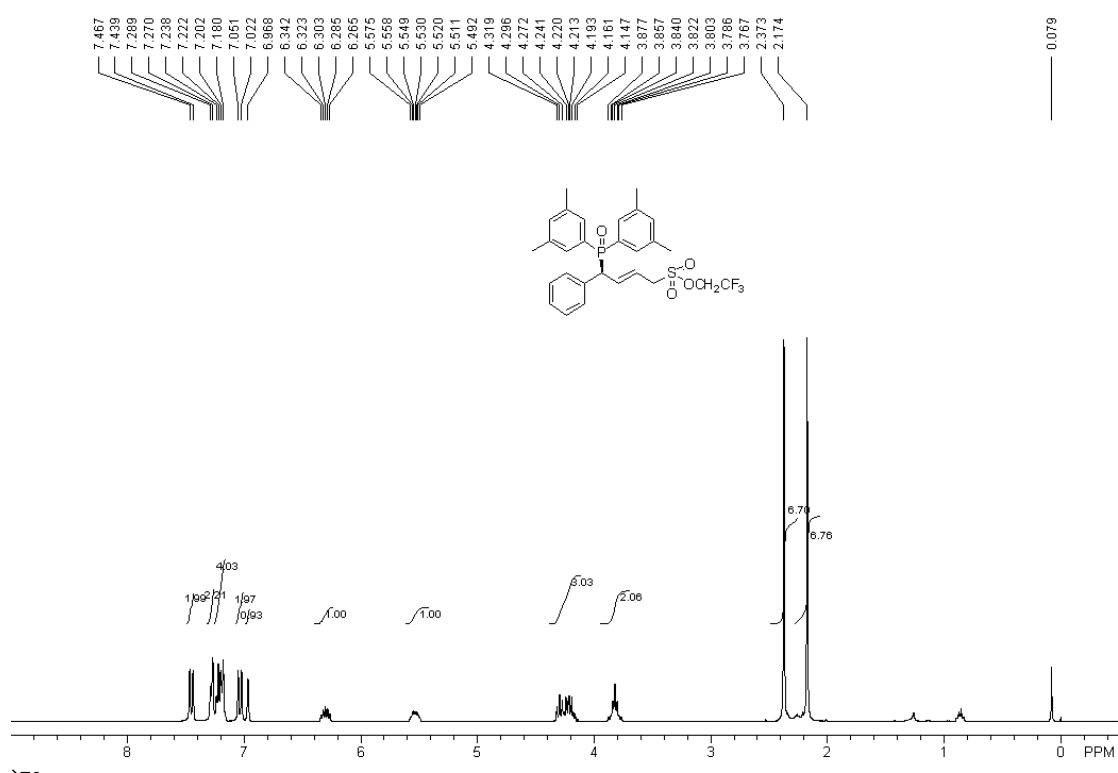

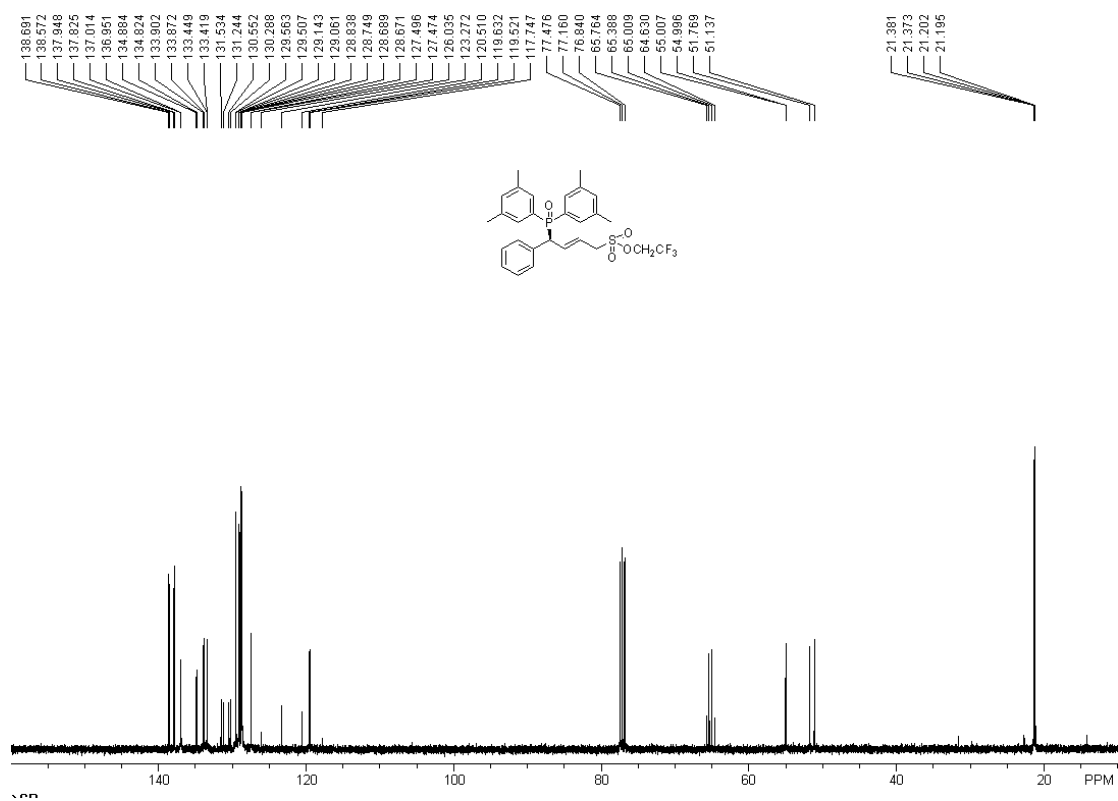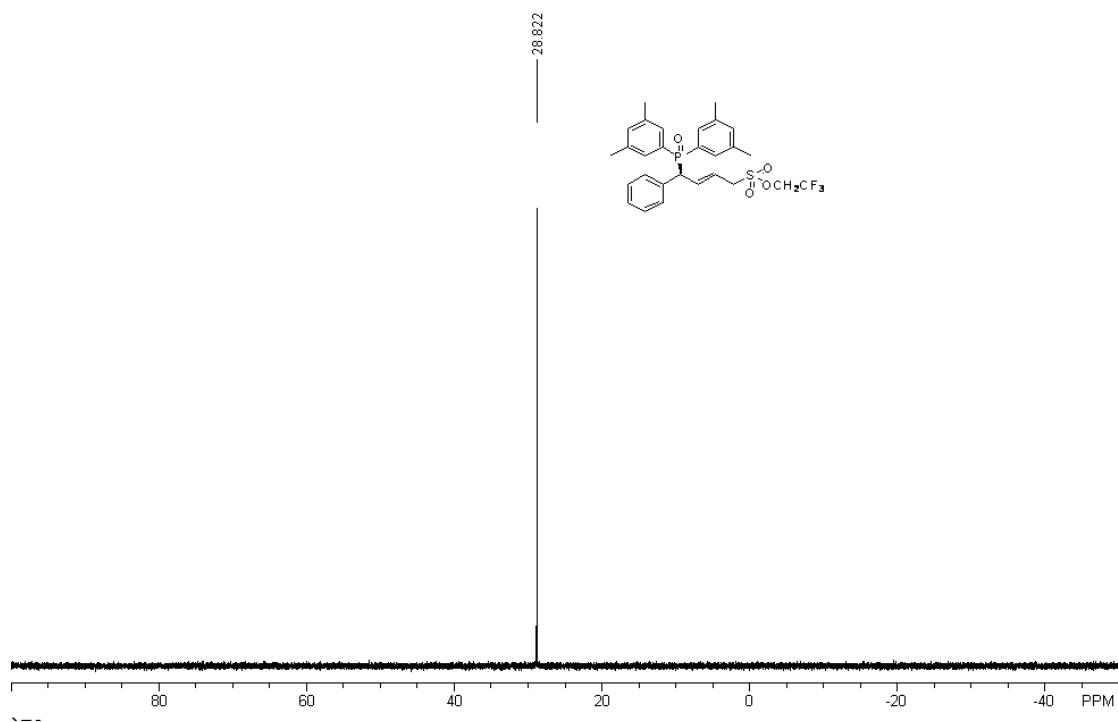

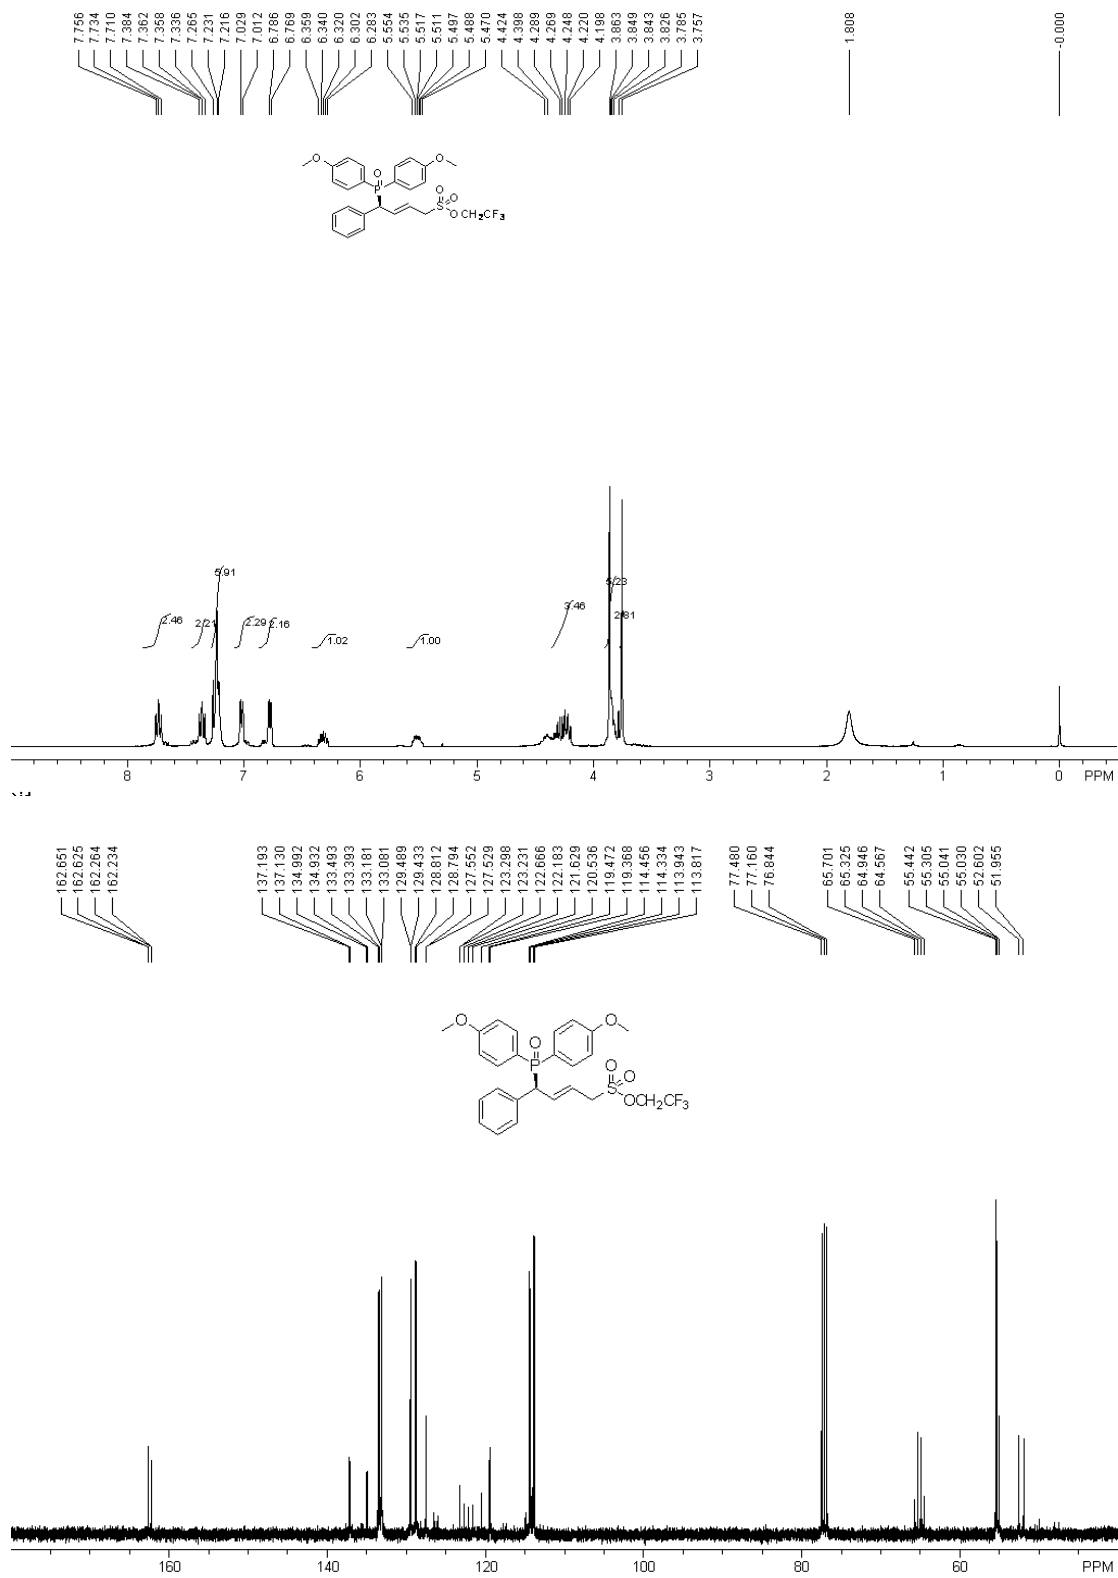

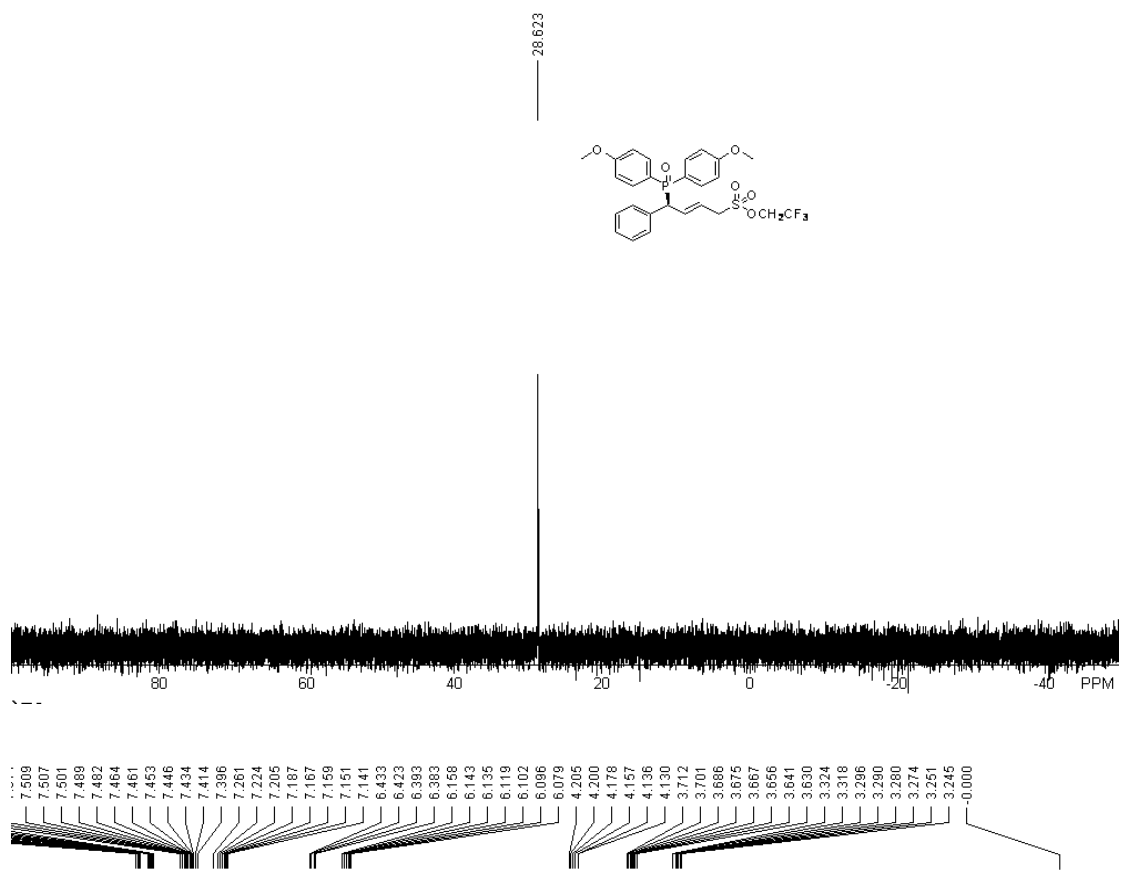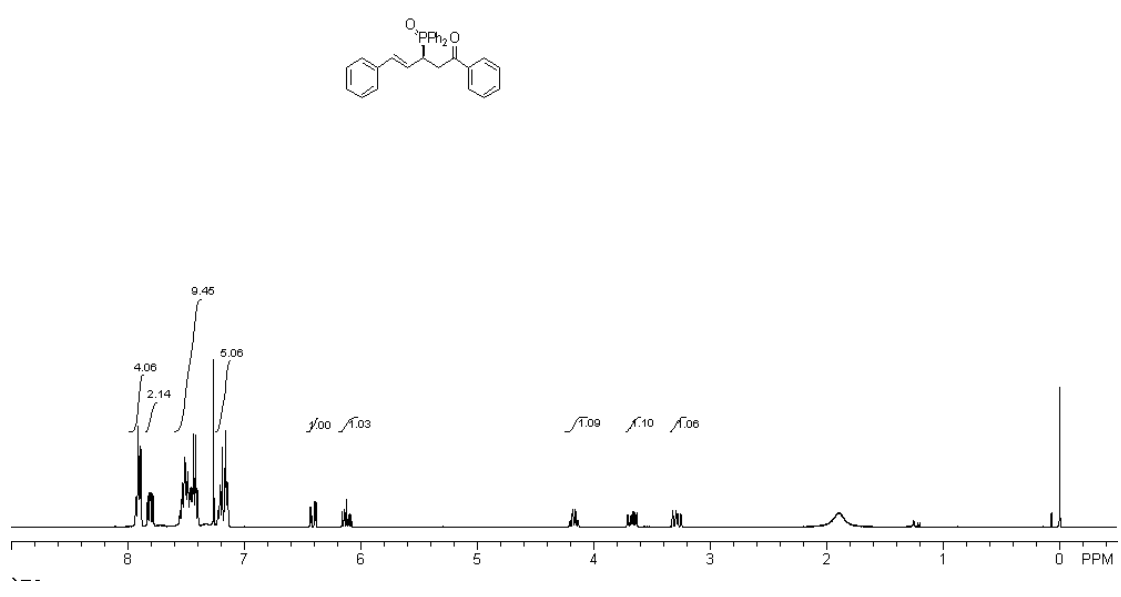

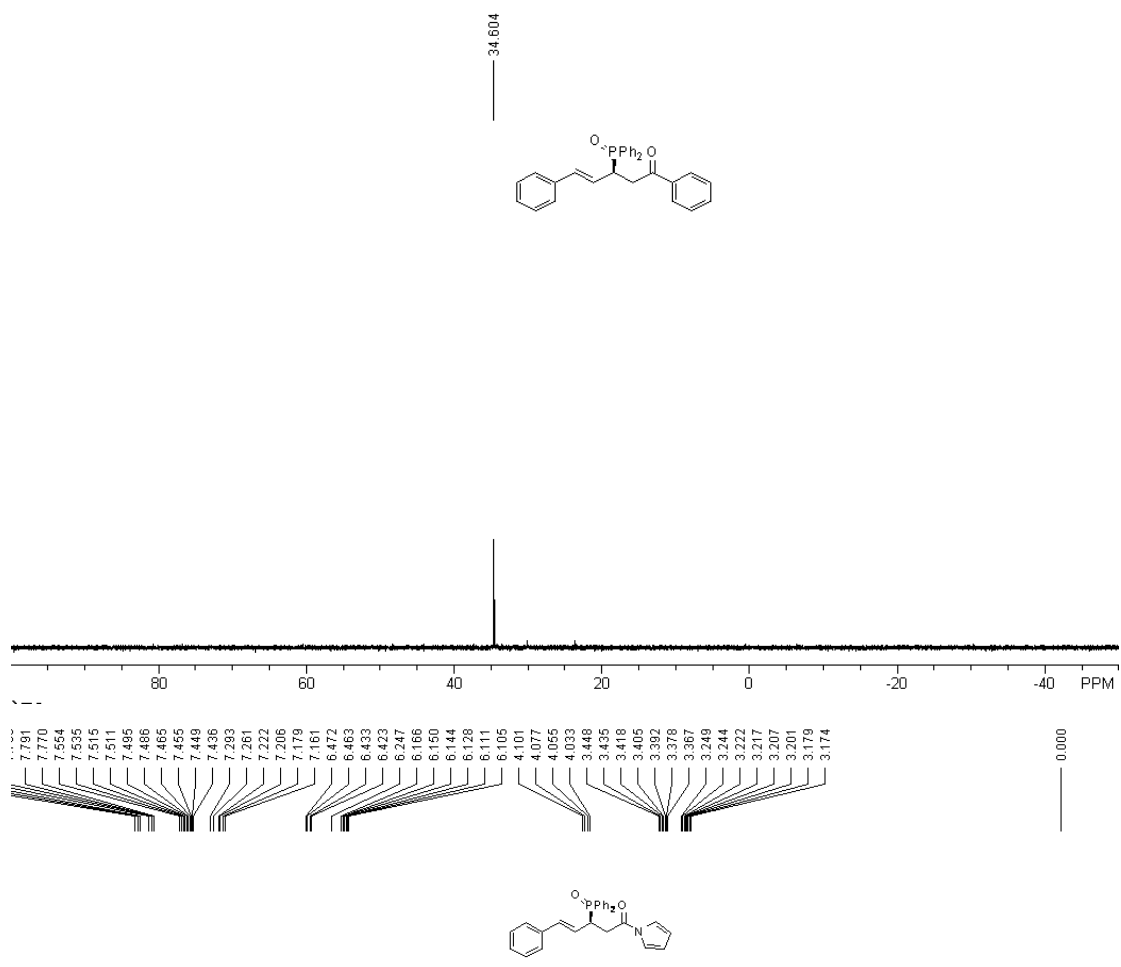

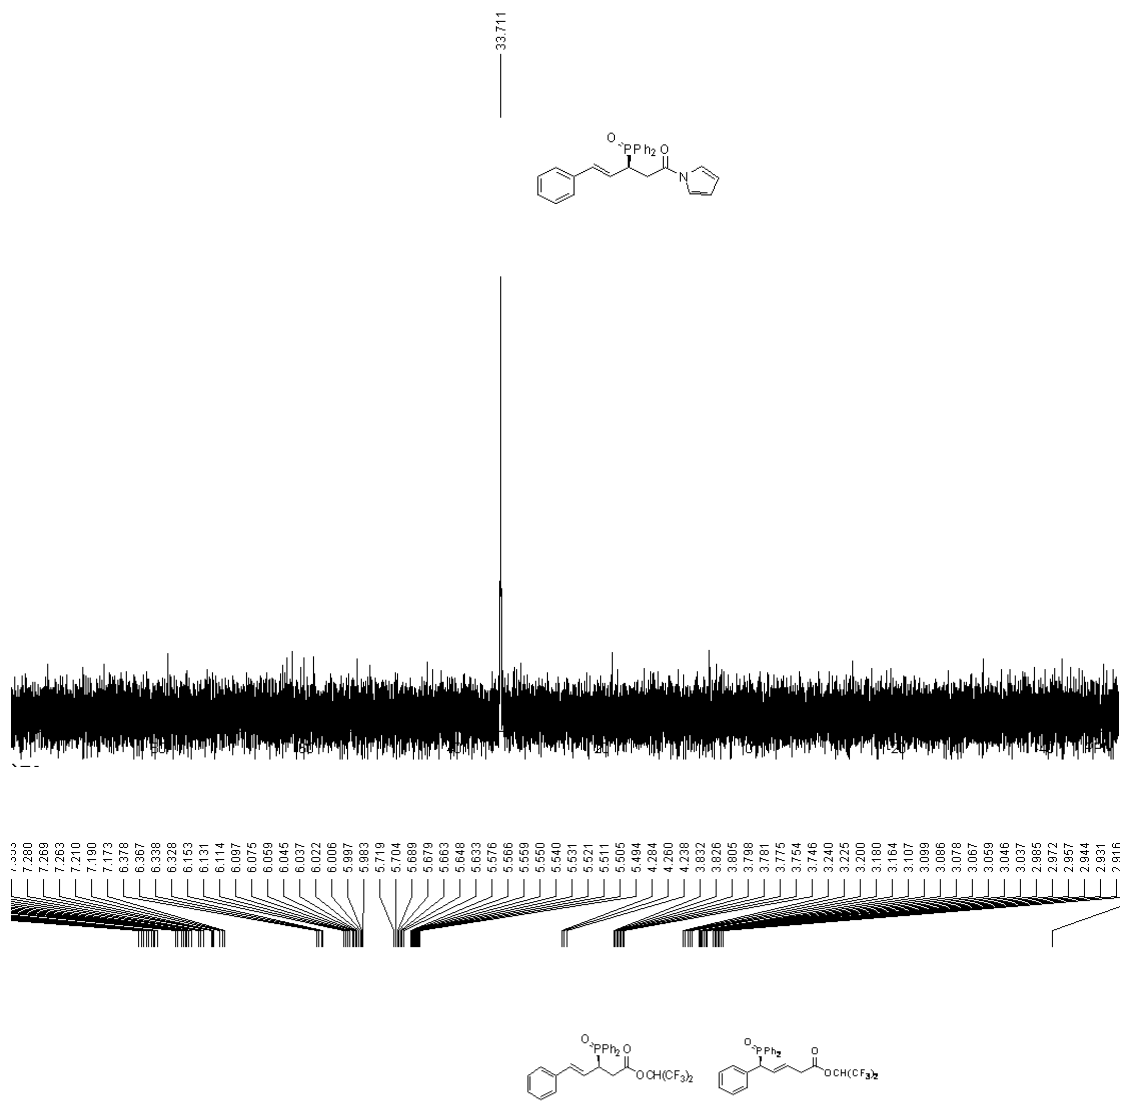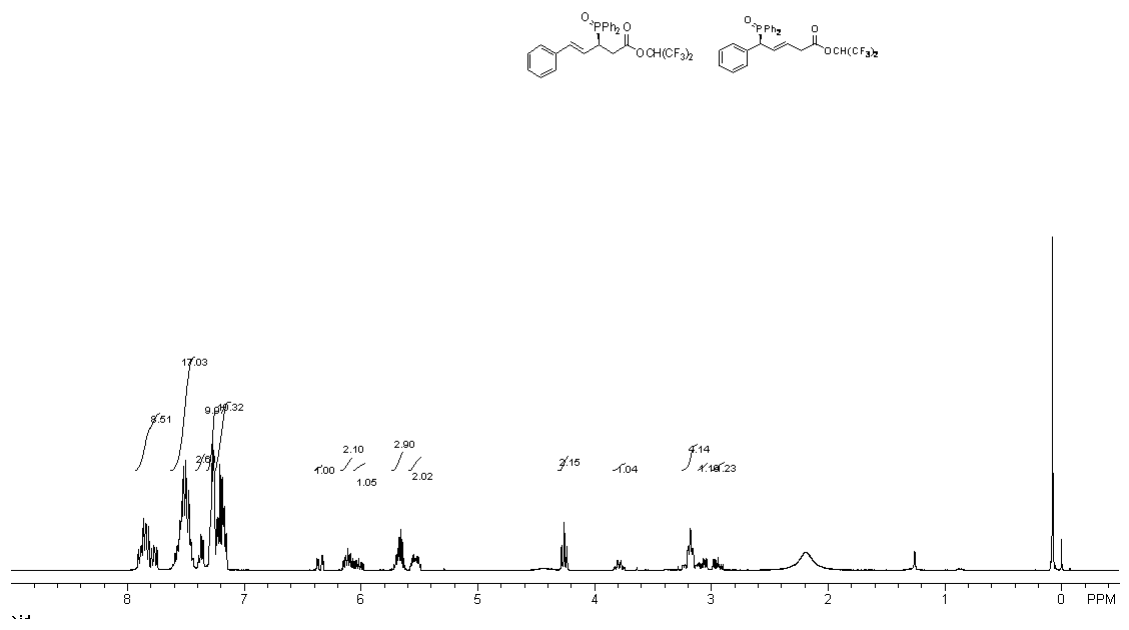

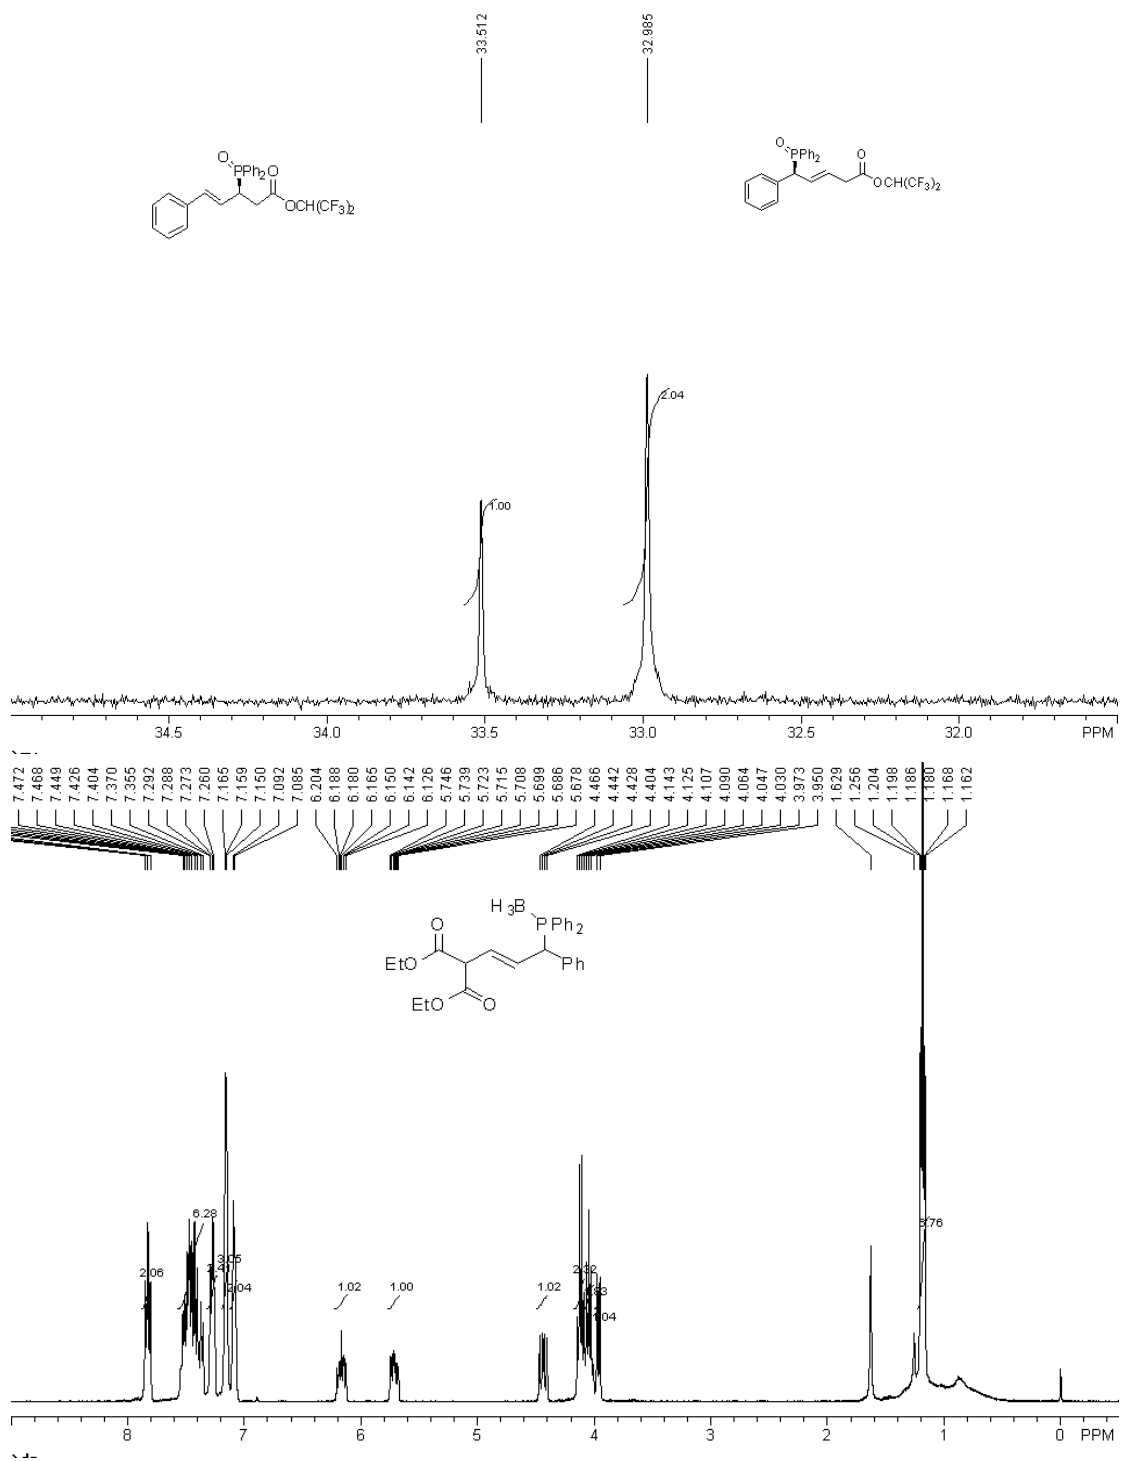

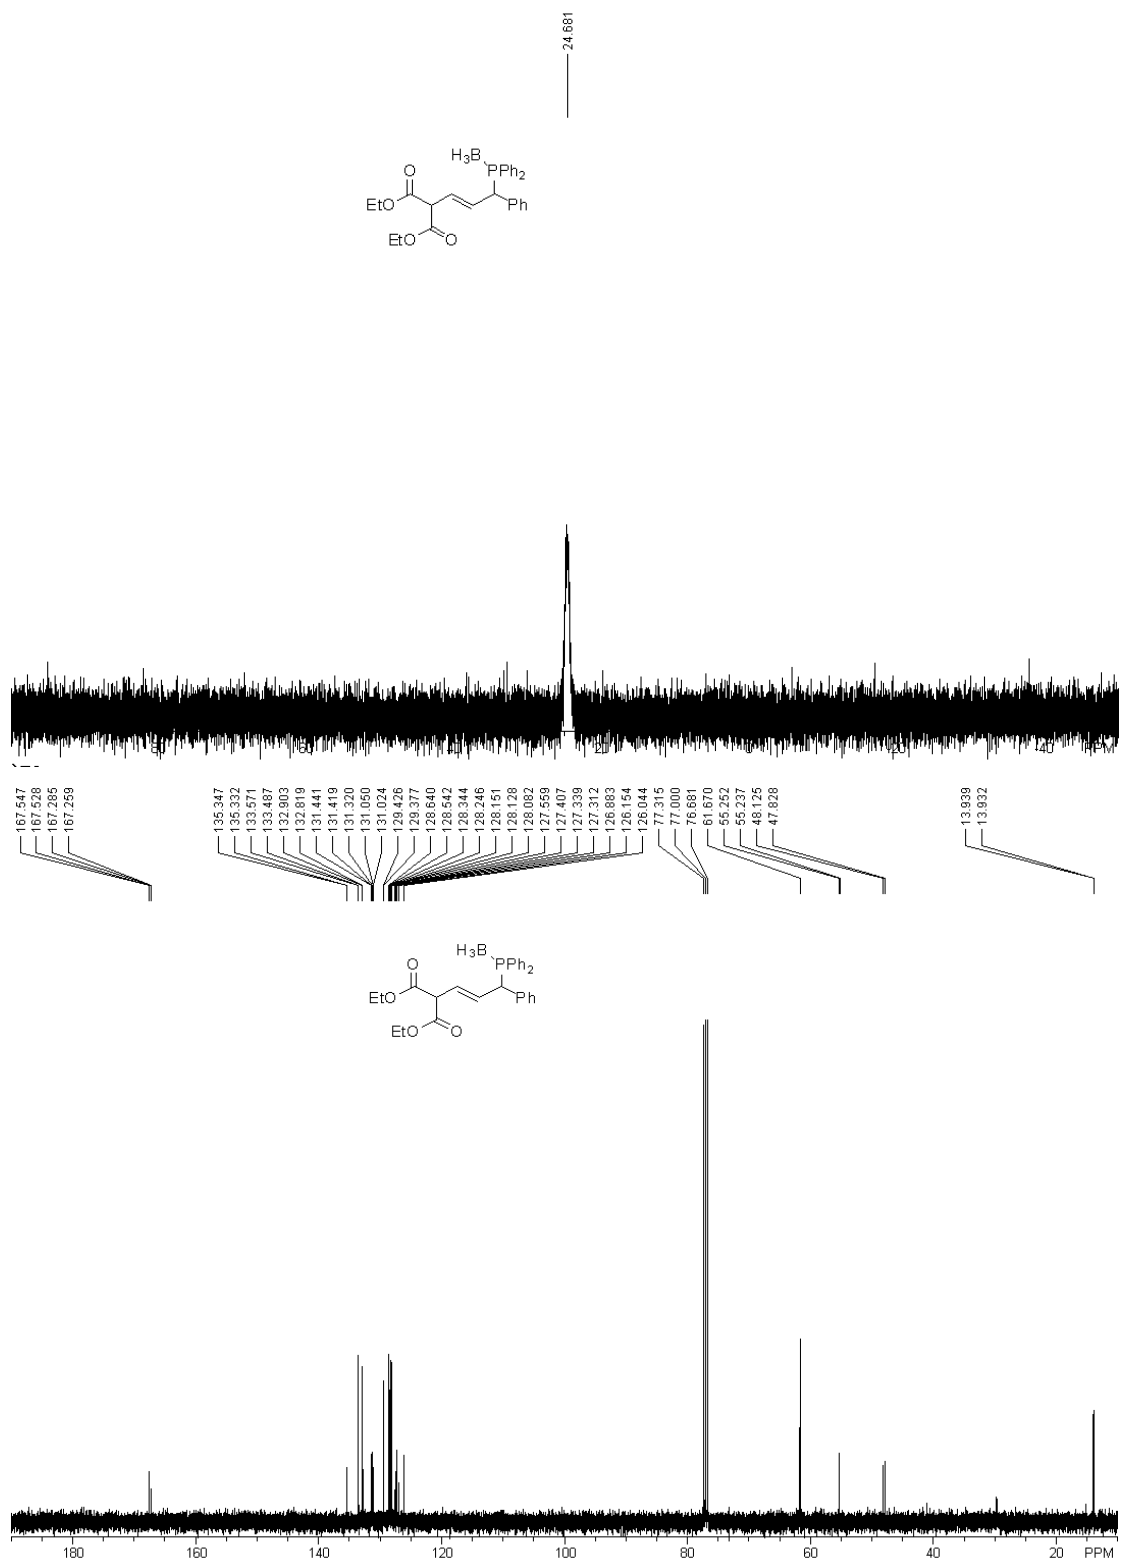

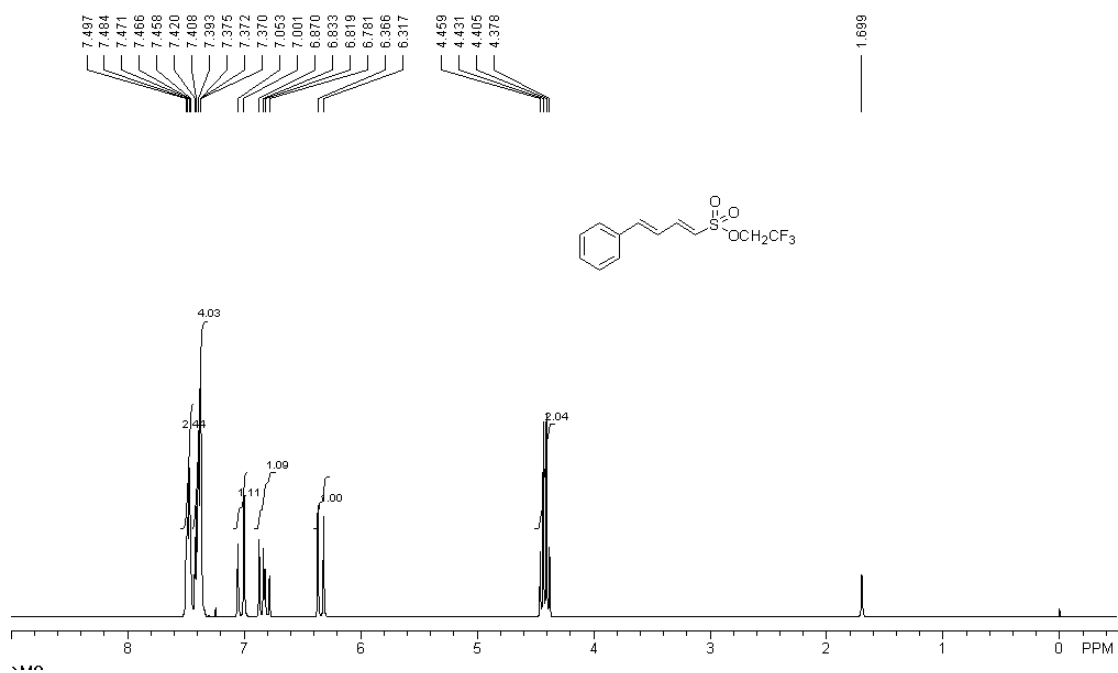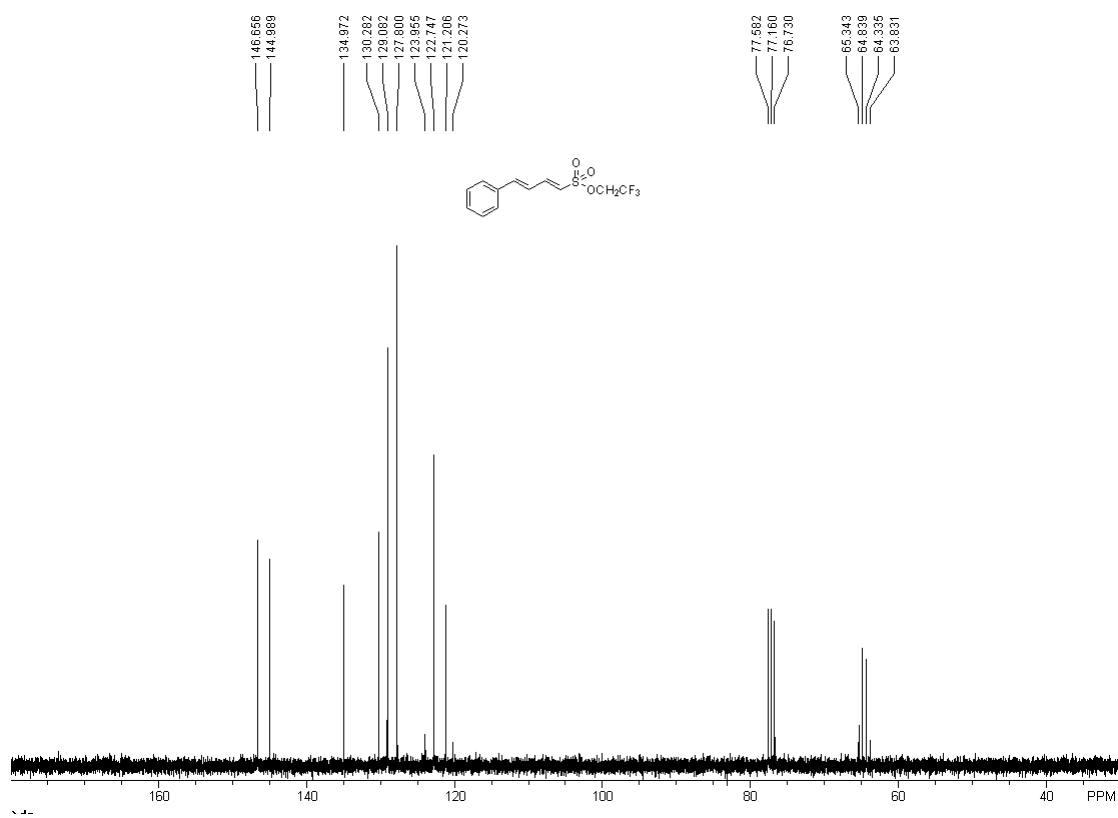

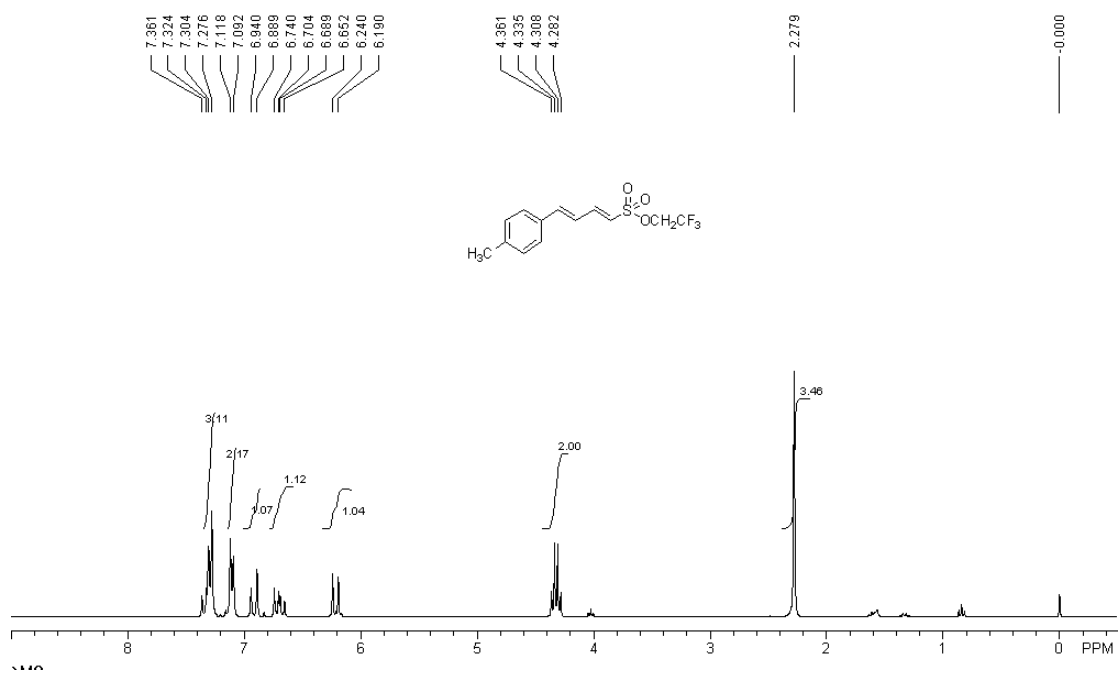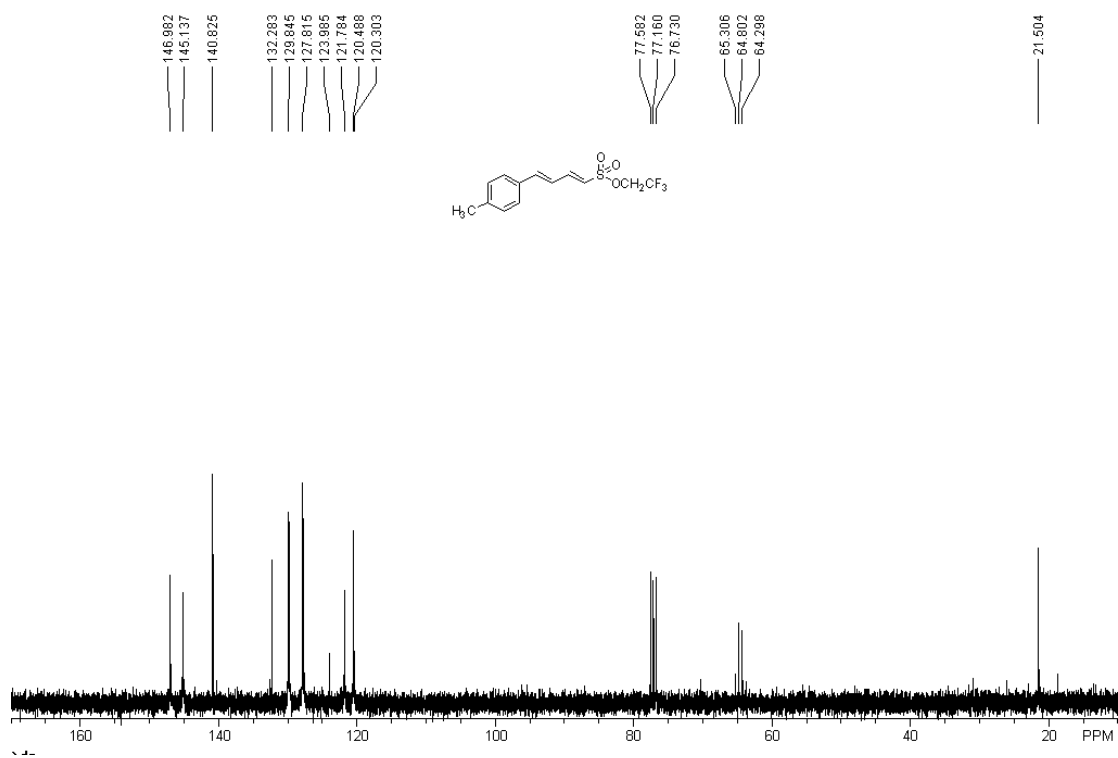

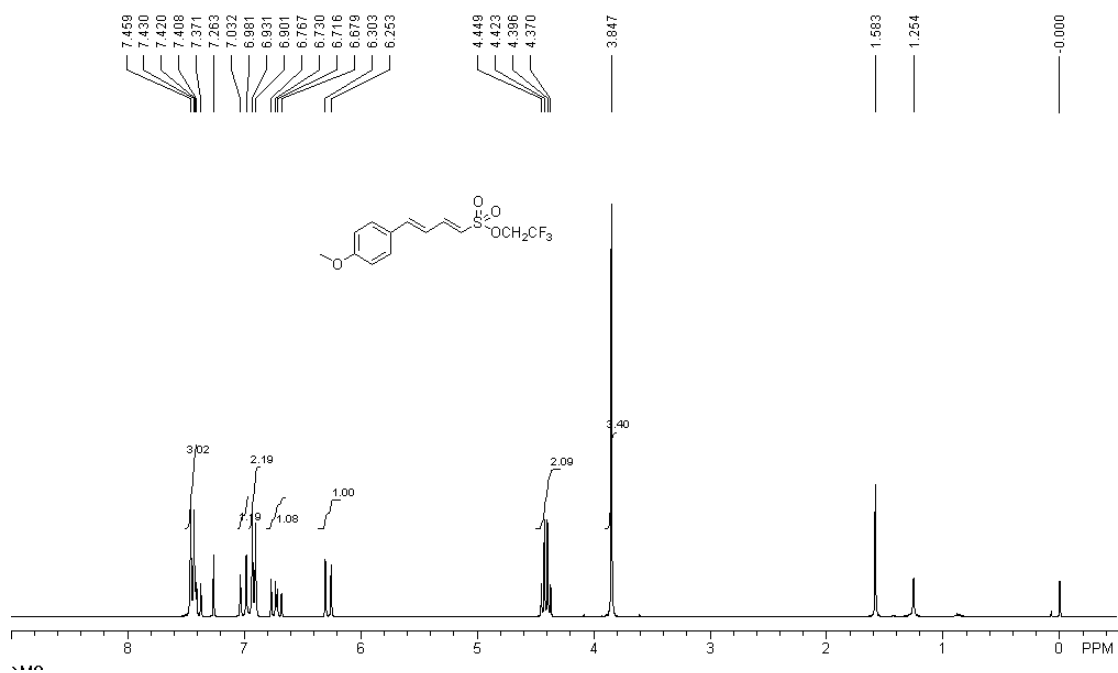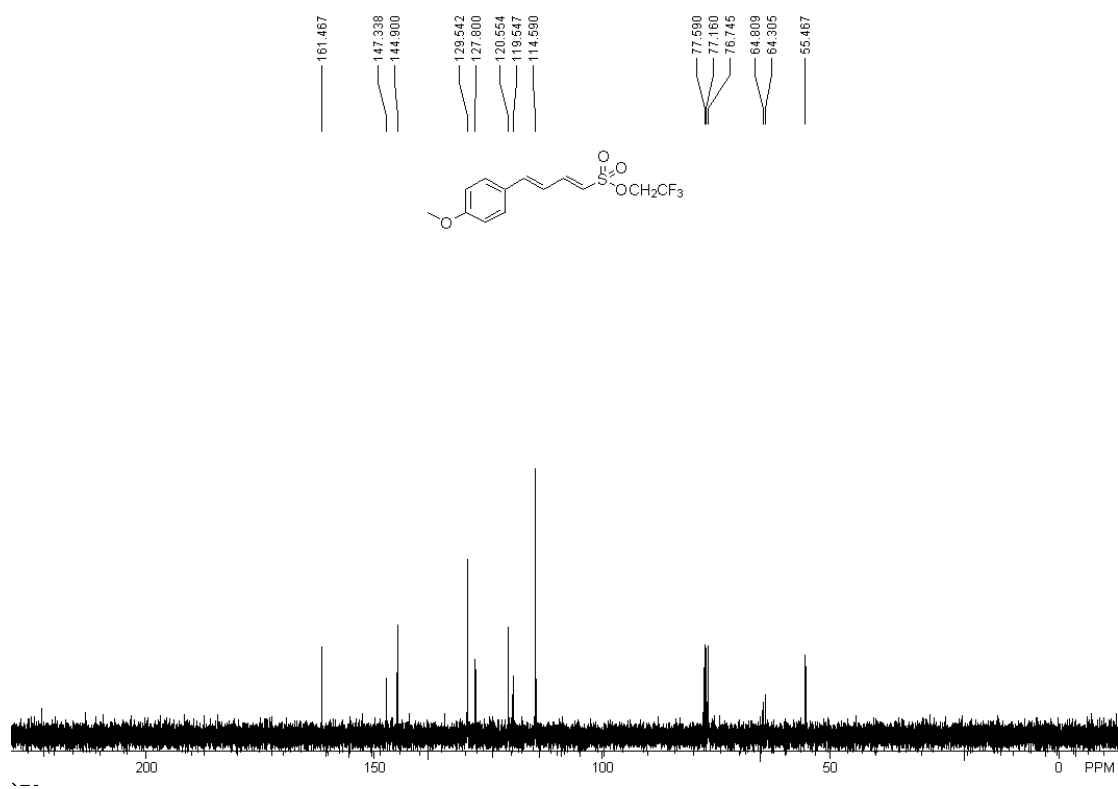

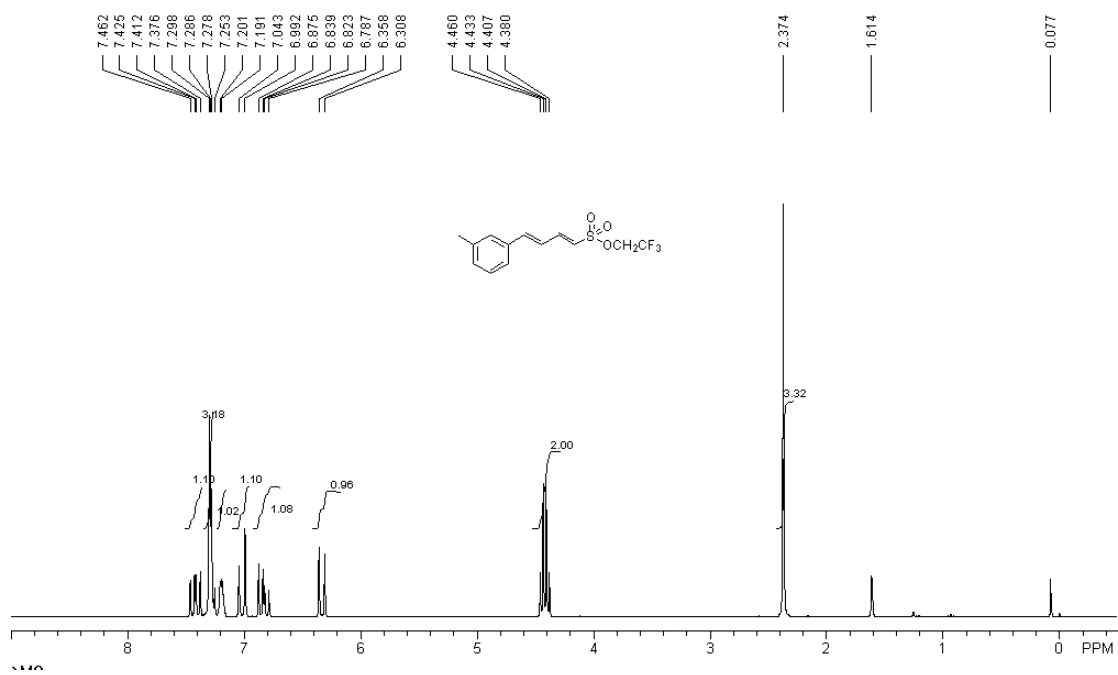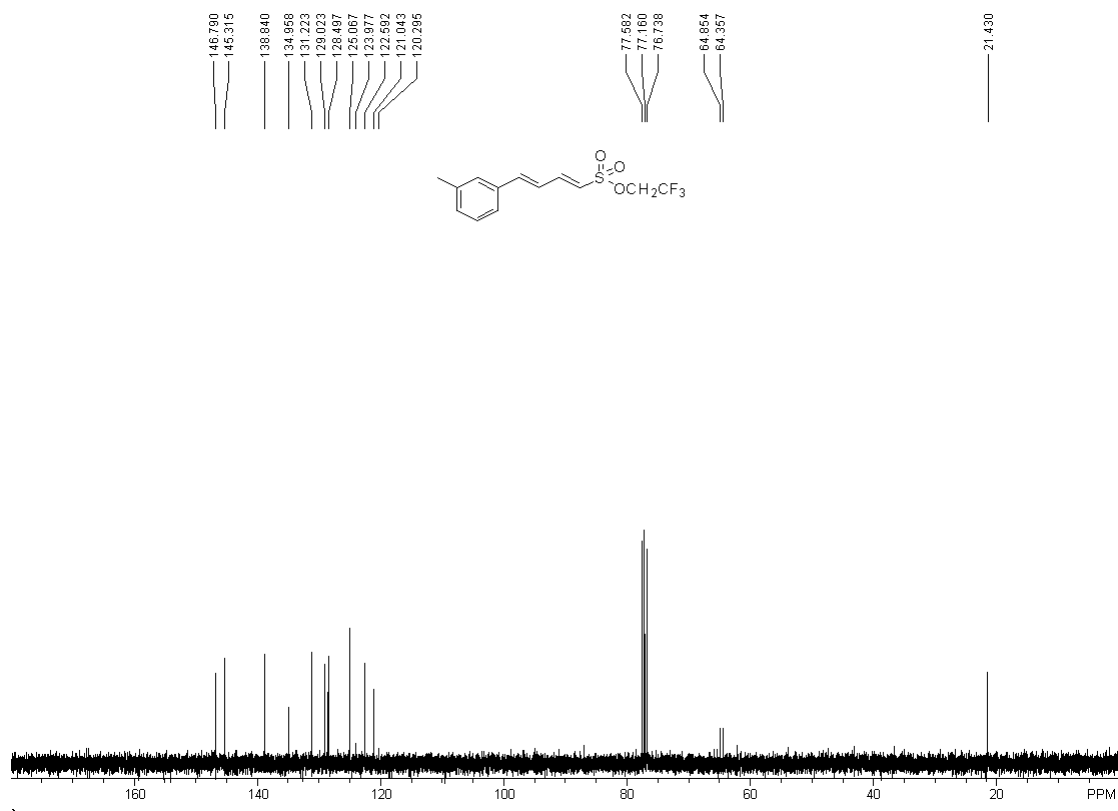

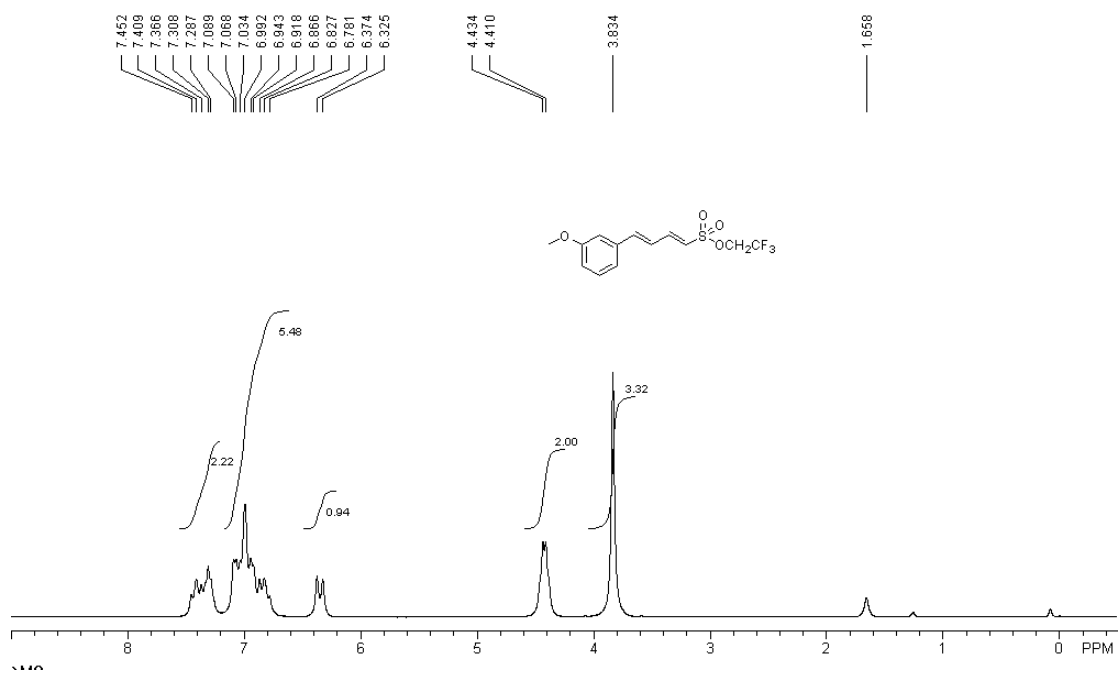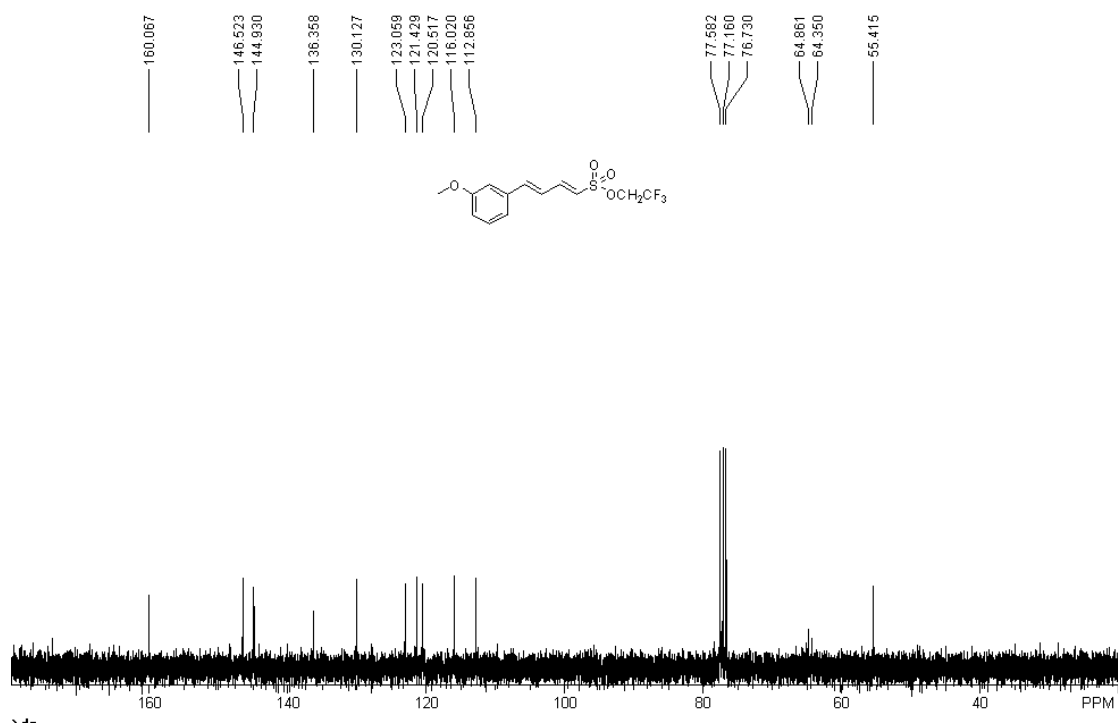

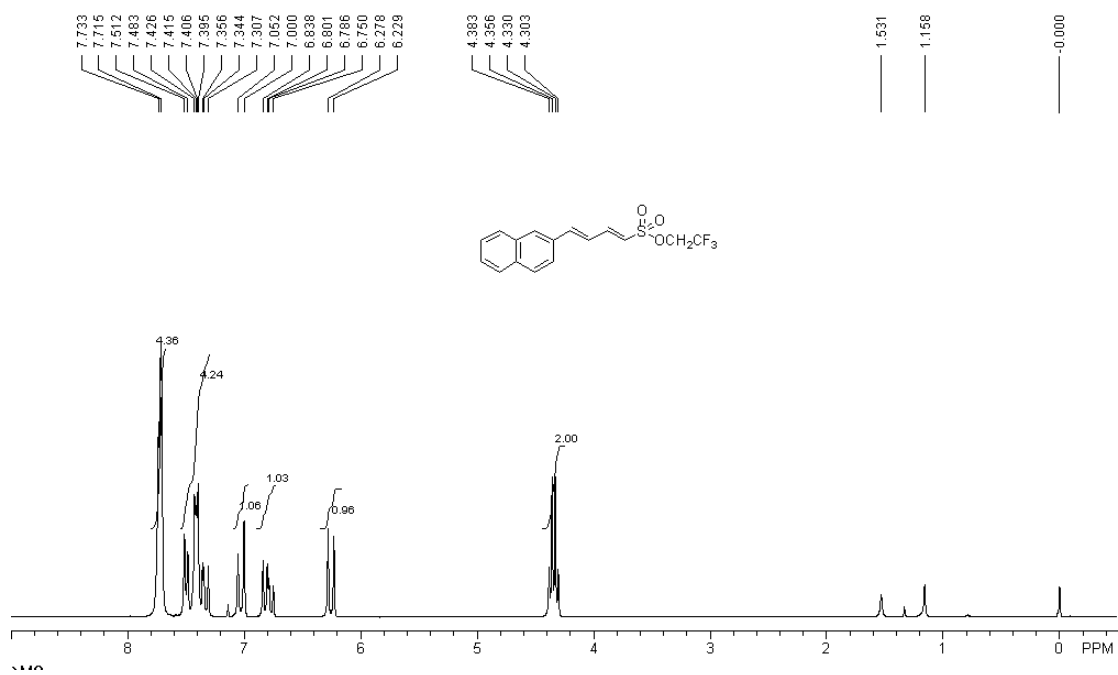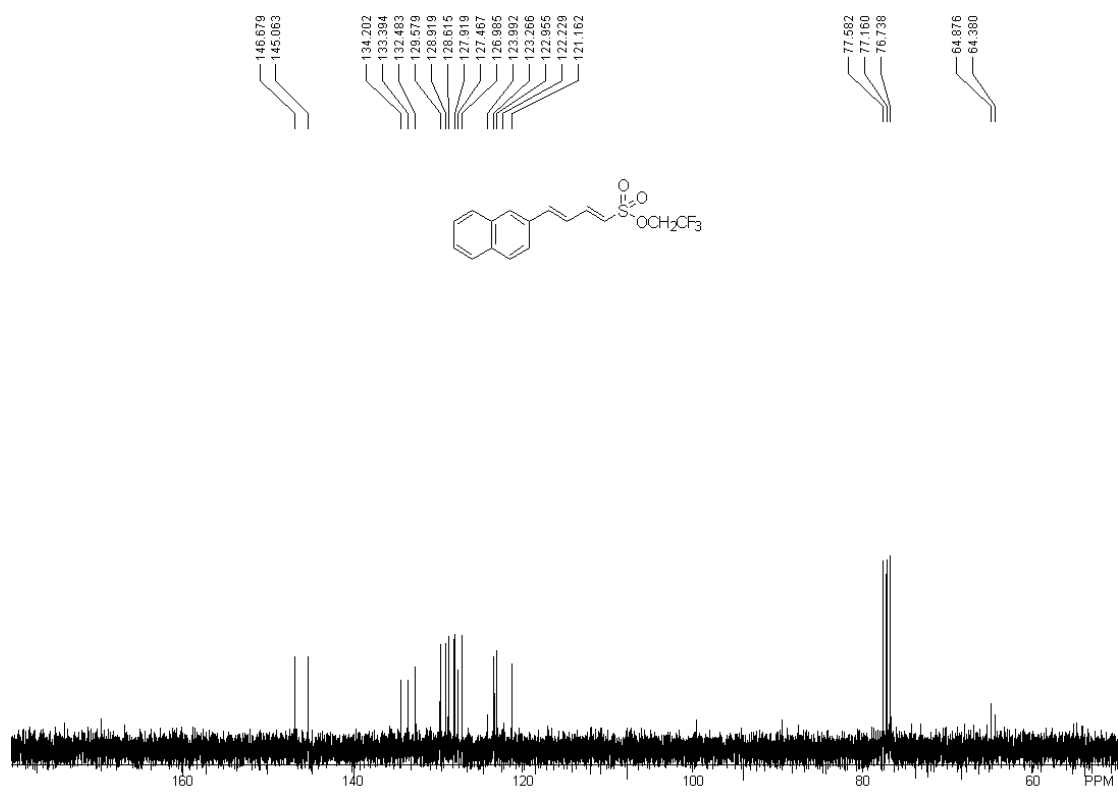

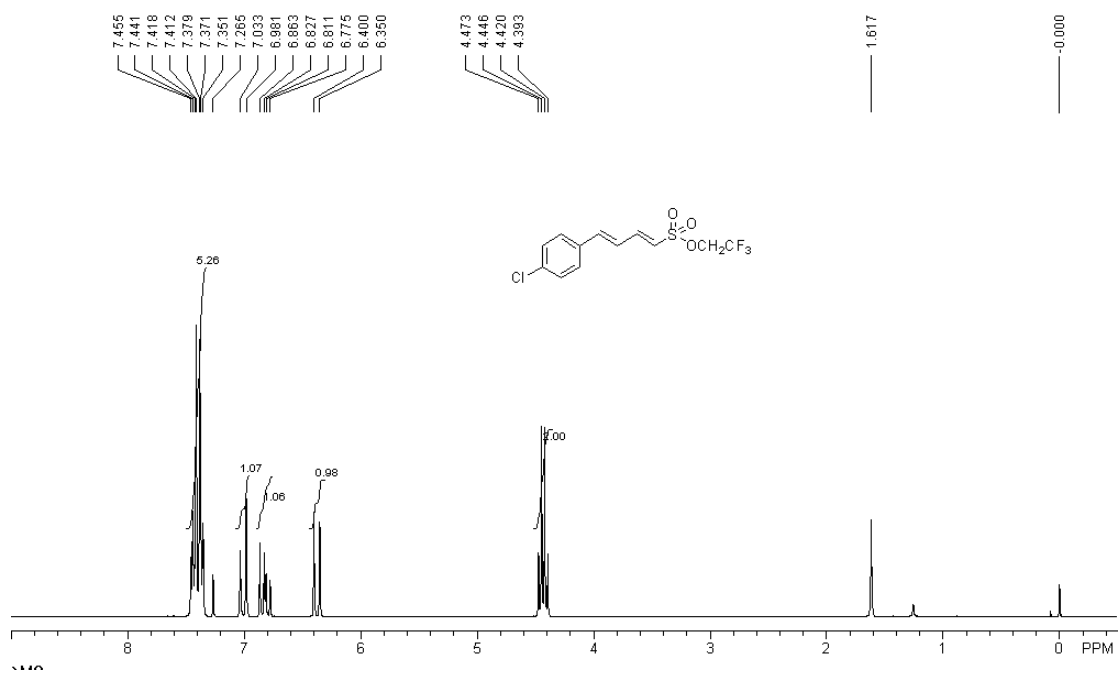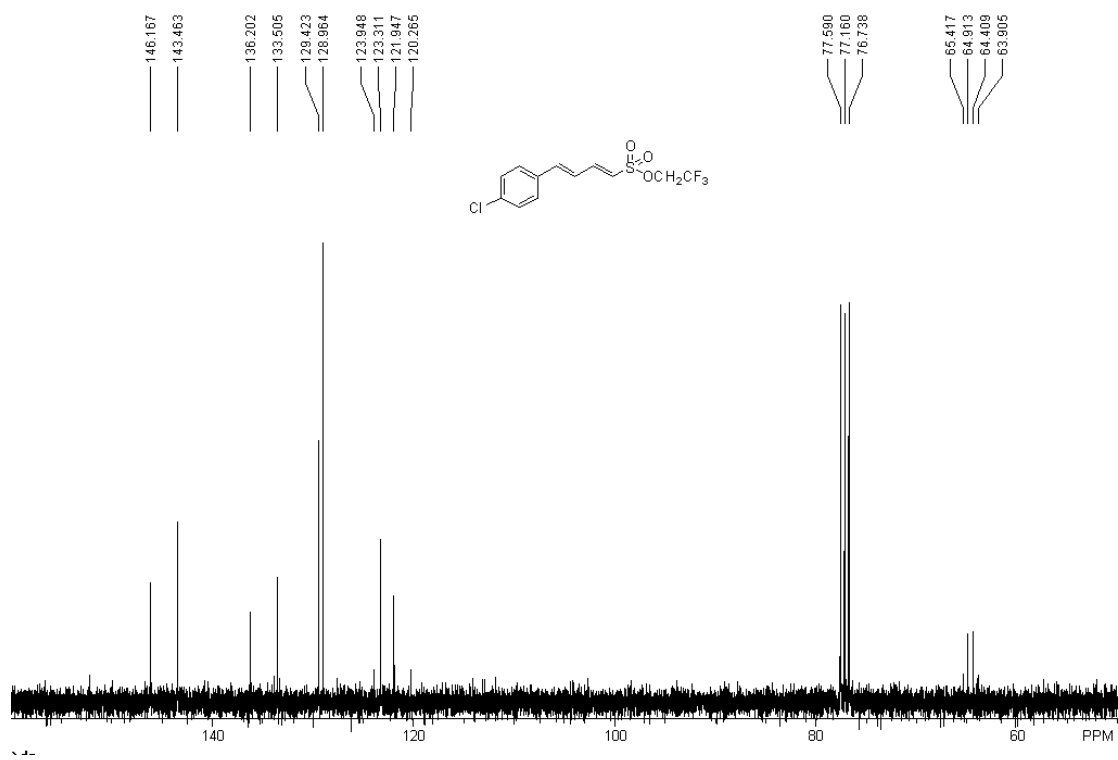

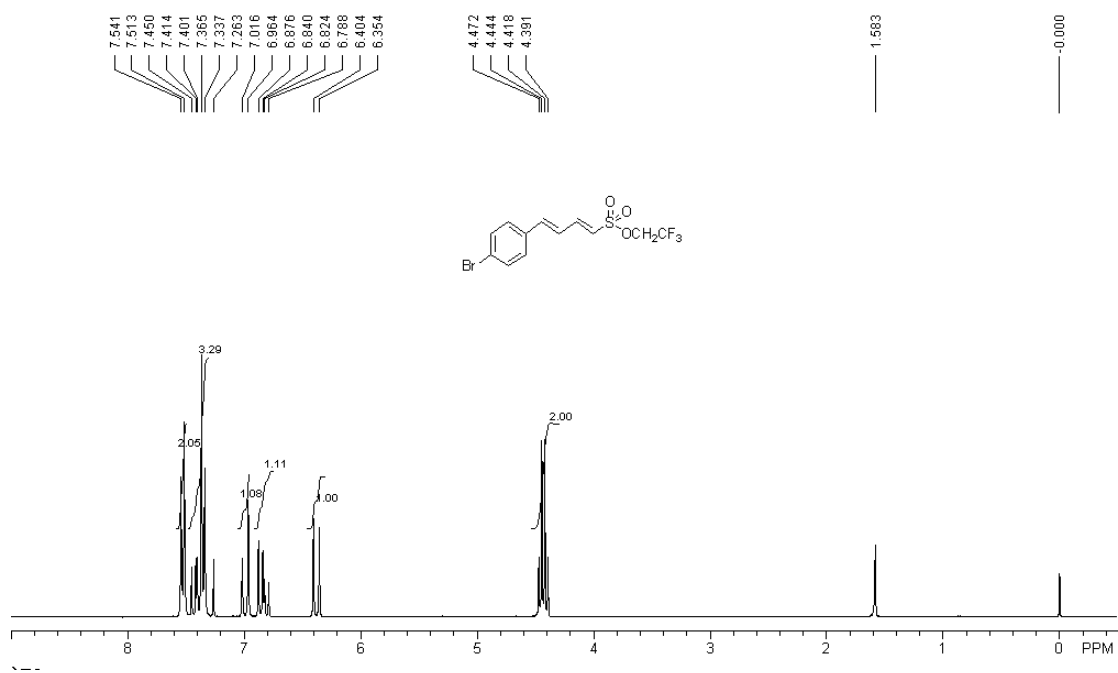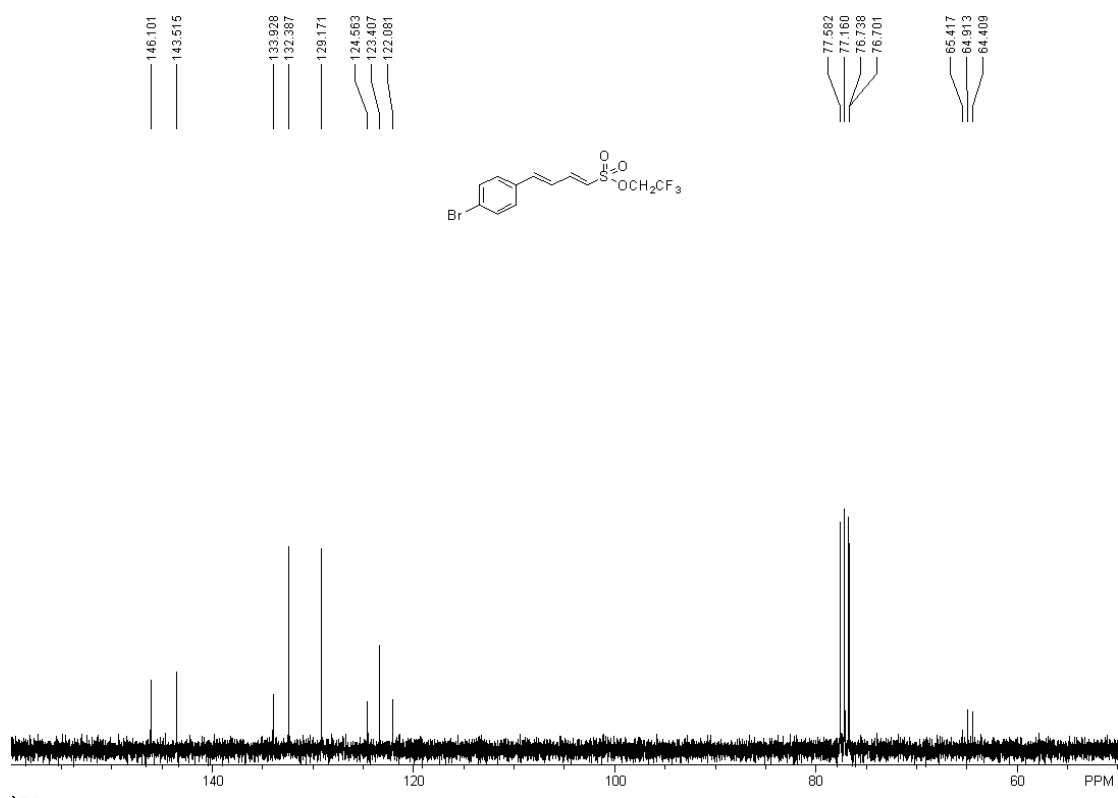

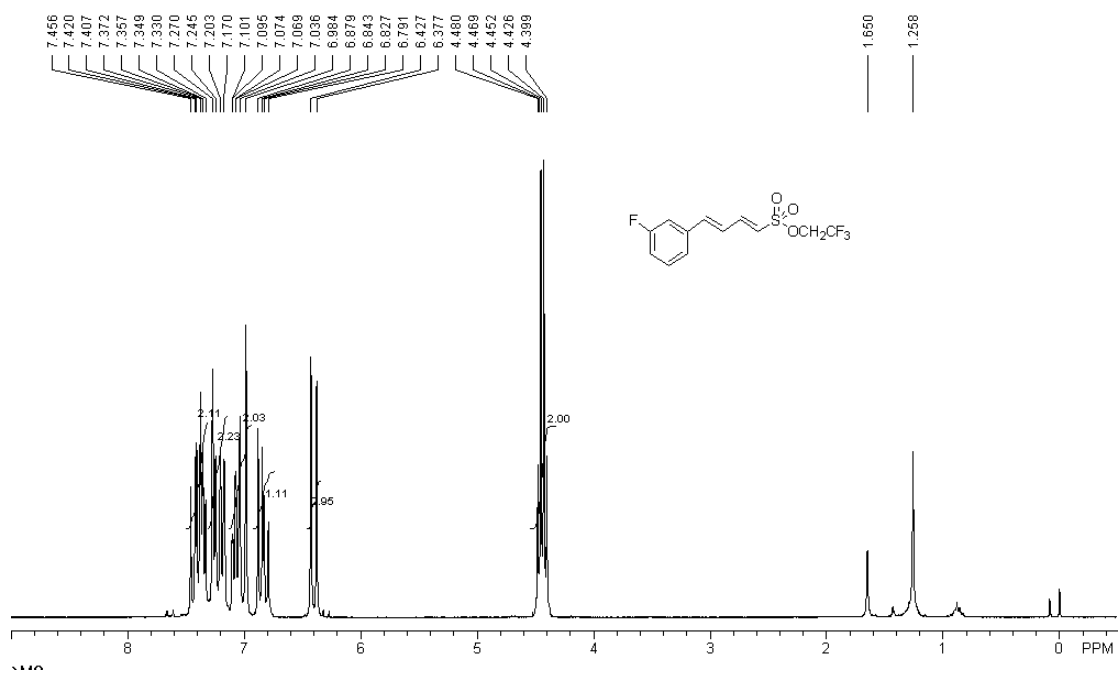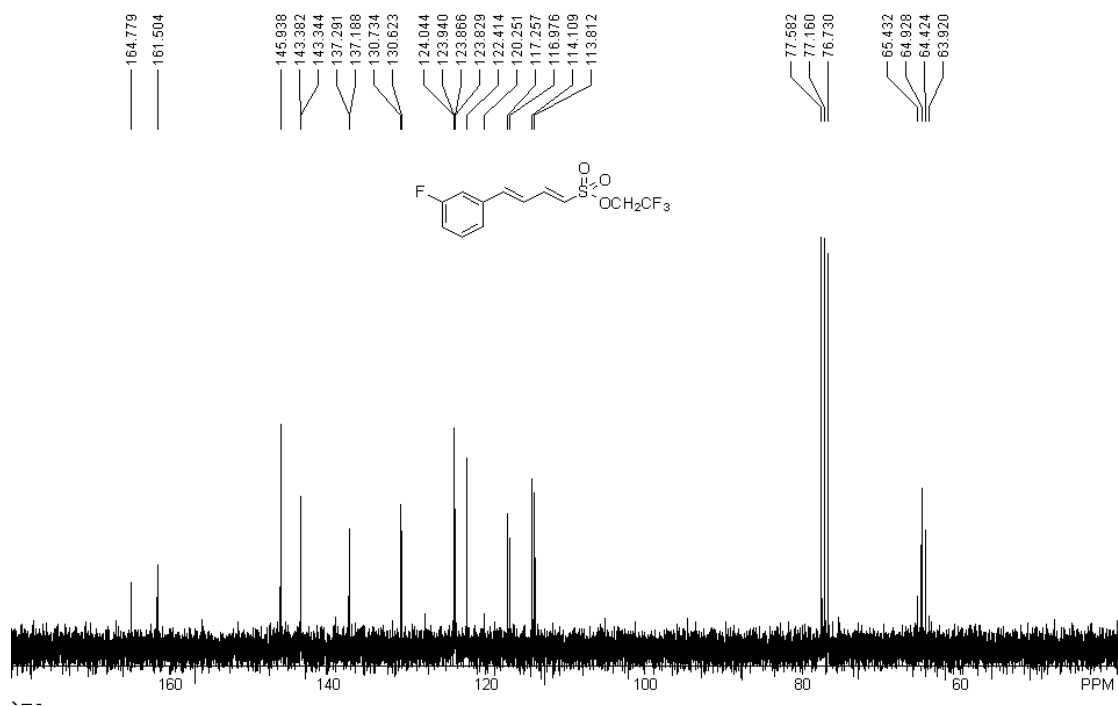

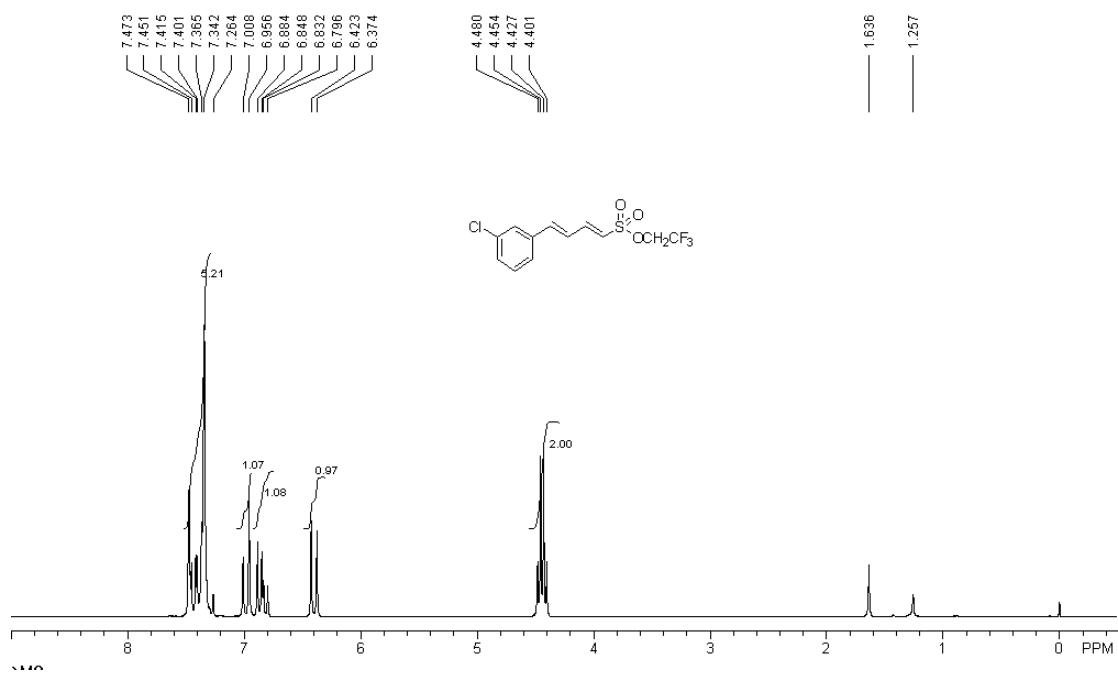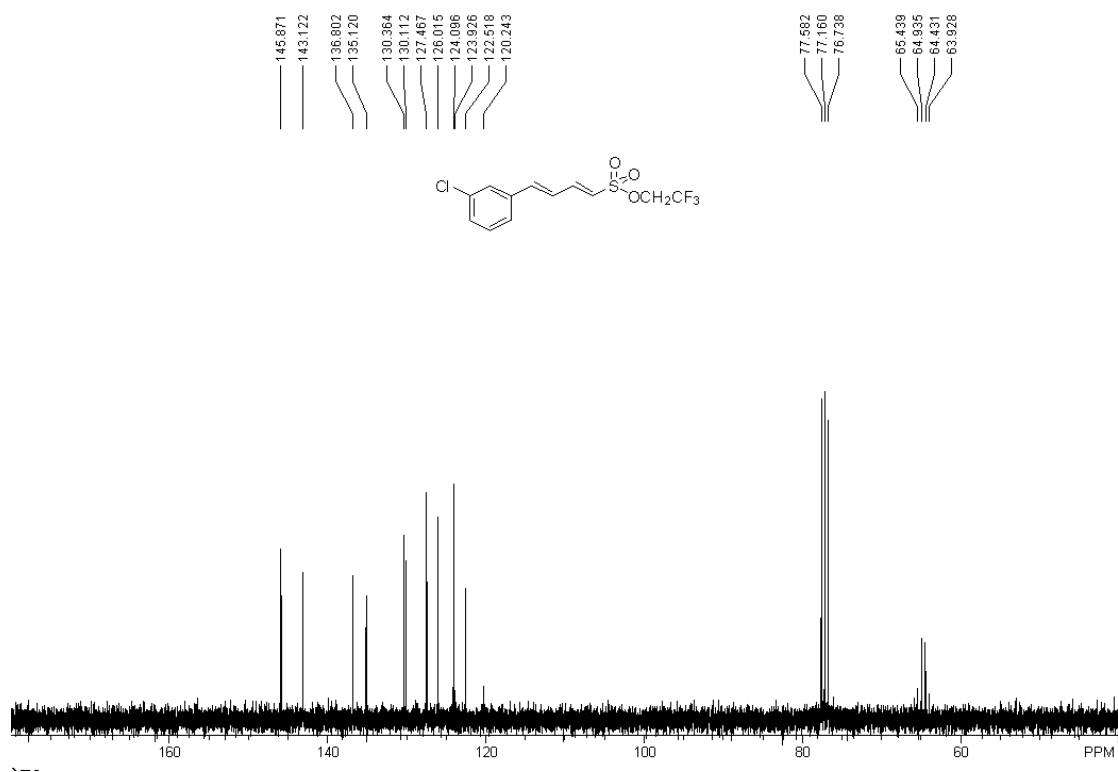

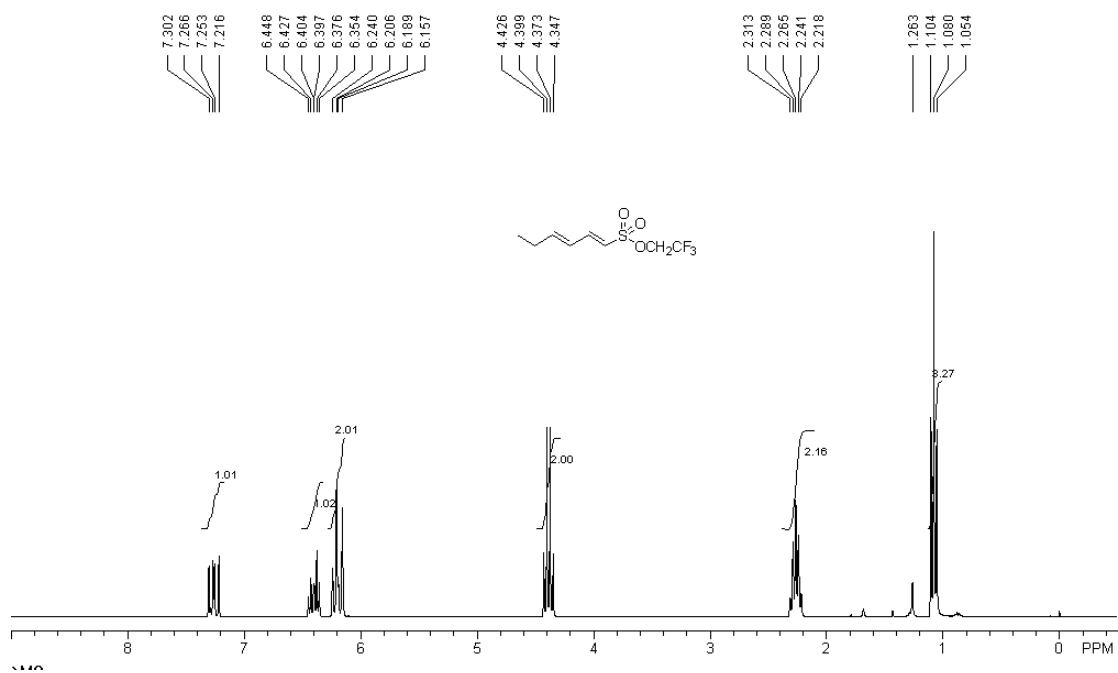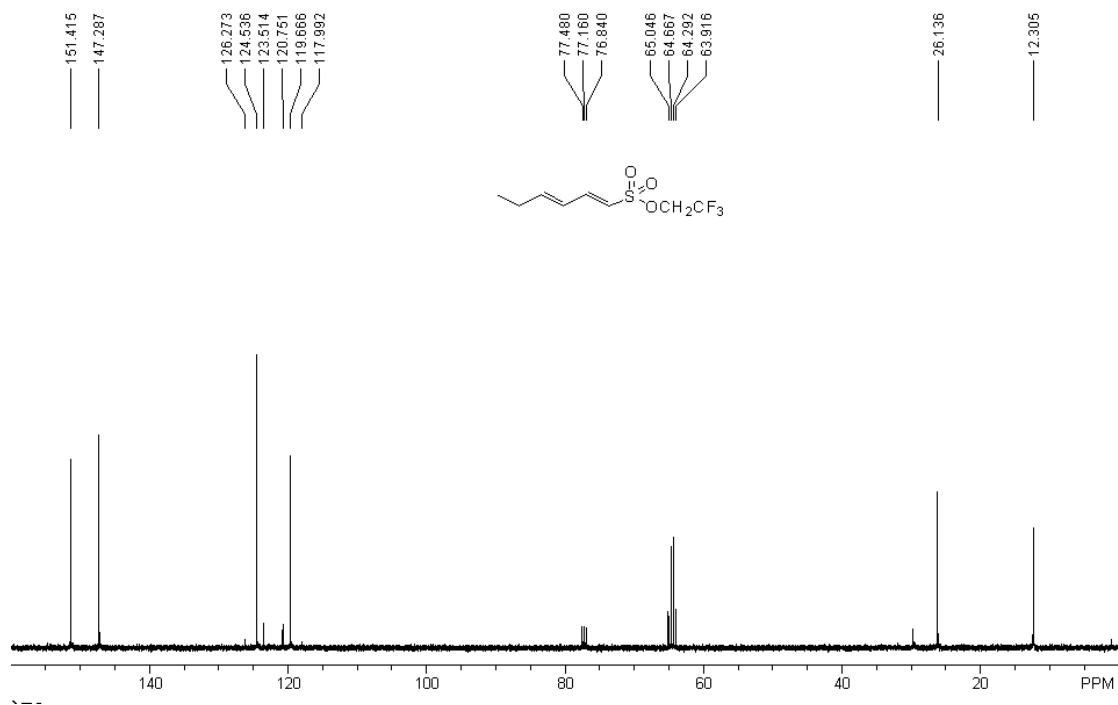

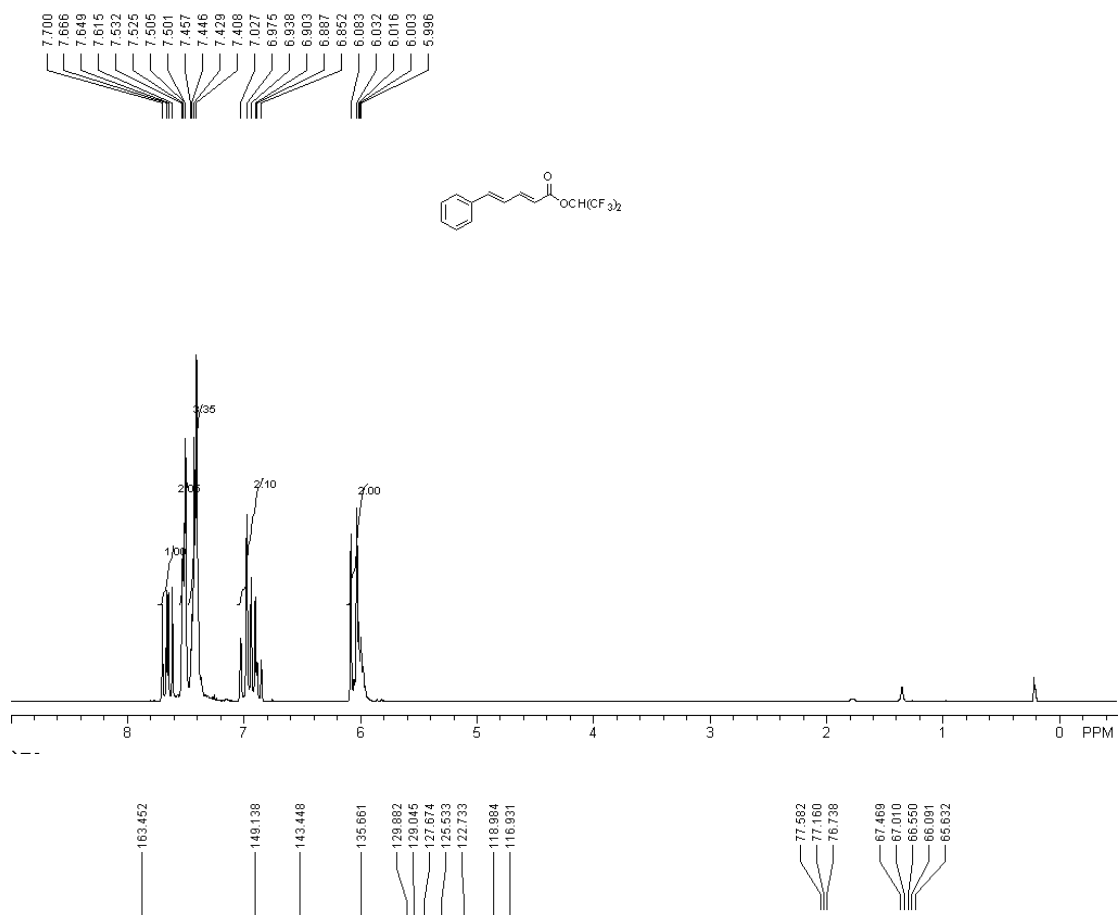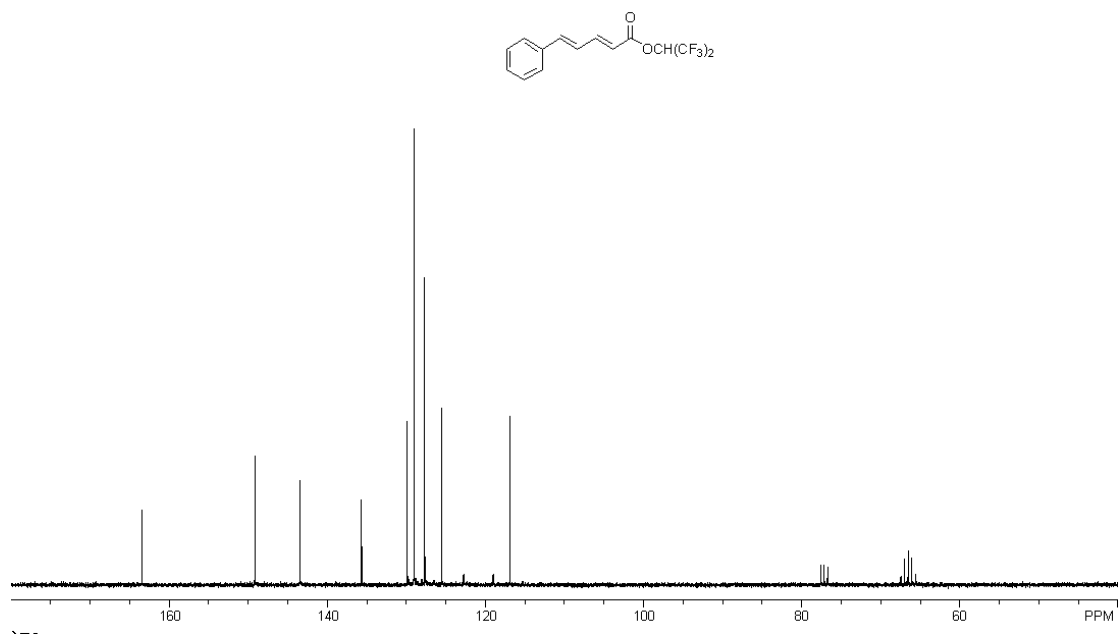

HPLC Chart

|                               |                           |                   |          |  |  |
|-------------------------------|---------------------------|-------------------|----------|--|--|
| 198 CJZ-5-6+- OD-H 73 214 0.7 |                           |                   |          |  |  |
| Sample Name:                  | CJZ-5-6+- OD-H 73 214 0.7 | Injection Volume: | 8.0      |  |  |
| Vial Number:                  | RA2                       | Channel:          | UV_VIS_2 |  |  |
| Sample Type:                  | unknown                   | Wavelength:       | 214.0    |  |  |
| Control Program:              | test-dad                  | Bandwidth:        | 4        |  |  |
| Quantif. Method:              | WXL                       | Dilution Factor:  | 1.0000   |  |  |
| Recording Time:               | 2013-3-25 10:13           | Sample Weight:    | 1.0000   |  |  |
| Run Time (min):               | 21.00                     | Sample Amount:    | 1.0000   |  |  |

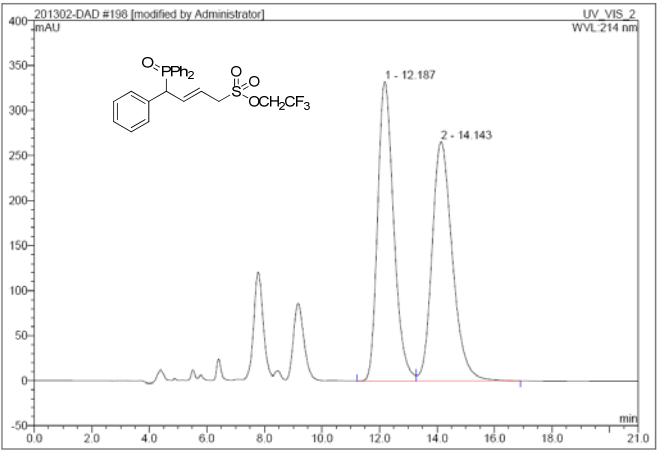

| No.    | Ret.Time min | Peak Name | Height mAU | Area mAU*min | Rel.Area % | Amount | Type |
|--------|--------------|-----------|------------|--------------|------------|--------|------|
| 1      | 12.19        | n.a.      | 333.231    | 216.146      | 49.71      | n.a.   | BM   |
| 2      | 14.14        | n.a.      | 265.955    | 218.711      | 50.29      | n.a.   | MB   |
| Total: |              |           | 599.185    | 434.856      | 100.00     | 0.000  |      |

|                               |                           |                   |          |  |  |
|-------------------------------|---------------------------|-------------------|----------|--|--|
| 199 CJZ-6-9-2 OD-H 73 214 0.7 |                           |                   |          |  |  |
| Sample Name:                  | CJZ-6-9-2 OD-H 73 214 0.7 | Injection Volume: | 4.0      |  |  |
| Vial Number:                  | RA1                       | Channel:          | UV_VIS_2 |  |  |
| Sample Type:                  | unknown                   | Wavelength:       | 214.0    |  |  |
| Control Program:              | test-dad                  | Bandwidth:        | 4        |  |  |
| Quantif. Method:              | WXL                       | Dilution Factor:  | 1.0000   |  |  |
| Recording Time:               | 2013-3-25 10:36           | Sample Weight:    | 1.0000   |  |  |
| Run Time (min):               | 23.44                     | Sample Amount:    | 1.0000   |  |  |

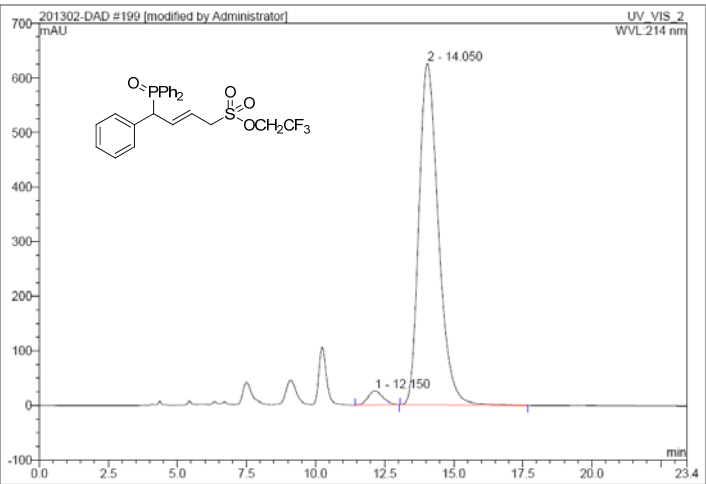

| No.    | Ret.Time min | Peak Name | Height mAU | Area mAU*min | Rel.Area % | Amount | Type |
|--------|--------------|-----------|------------|--------------|------------|--------|------|
| 1      | 12.15        | n.a.      | 25.745     | 16.234       | 3.08       | n.a.   | BMB* |
| 2      | 14.05        | n.a.      | 625.605    | 510.931      | 96.92      | n.a.   | BMB* |
| Total: |              |           | 651.350    | 527.165      | 100.00     | 0.000  |      |

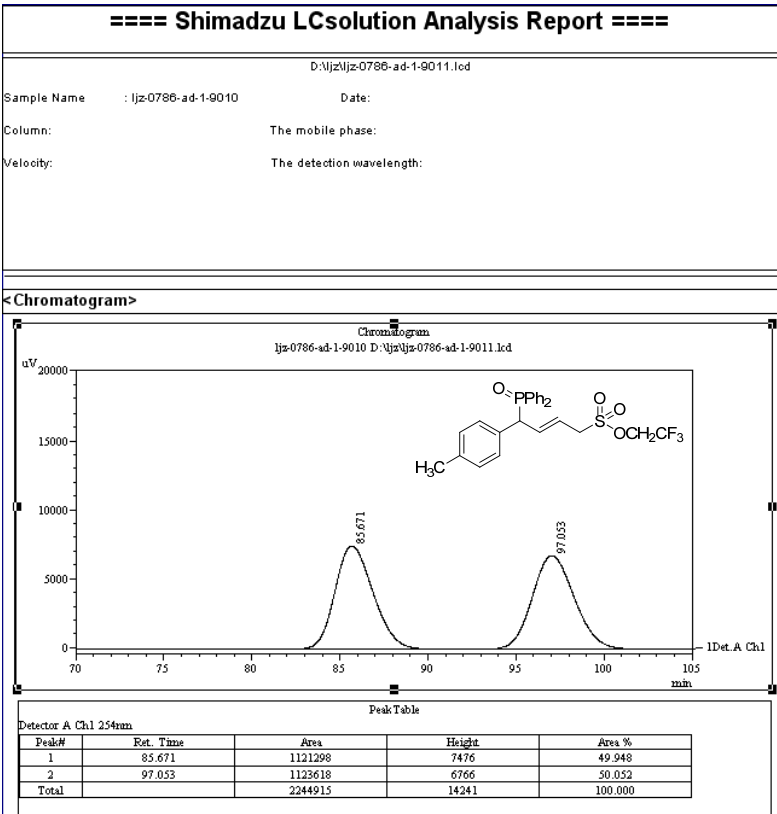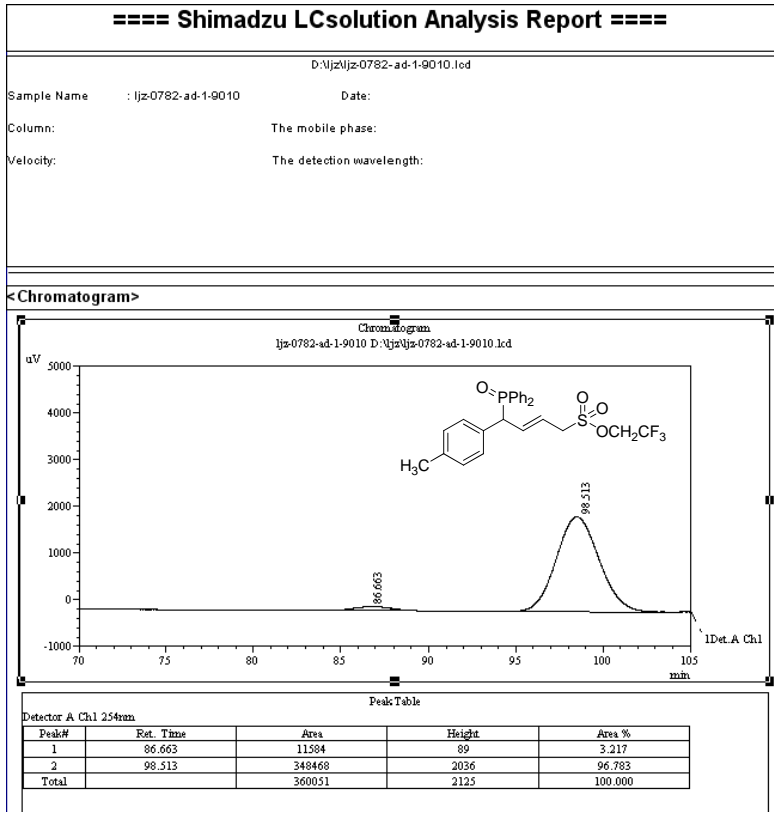

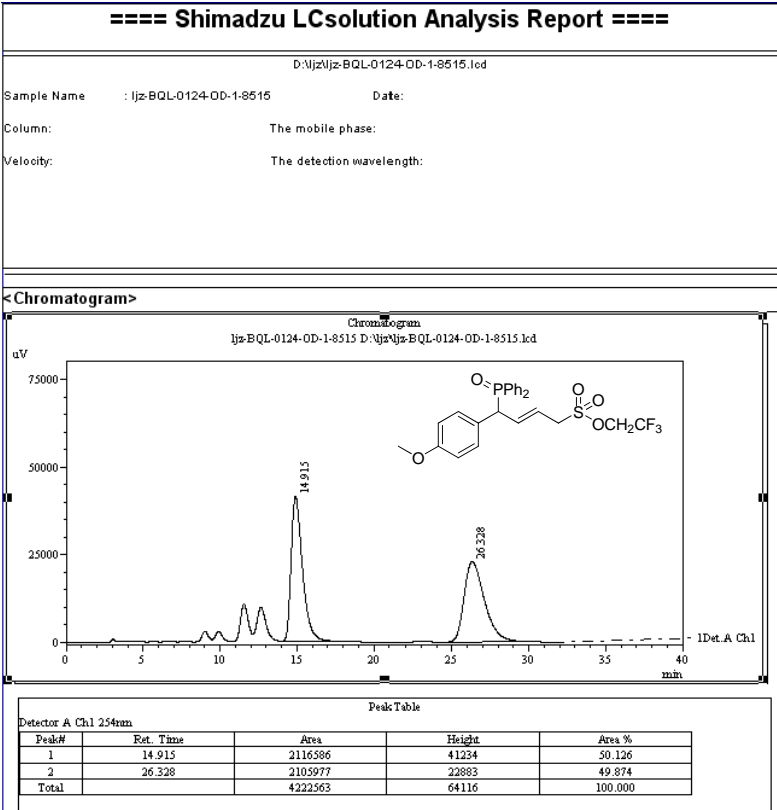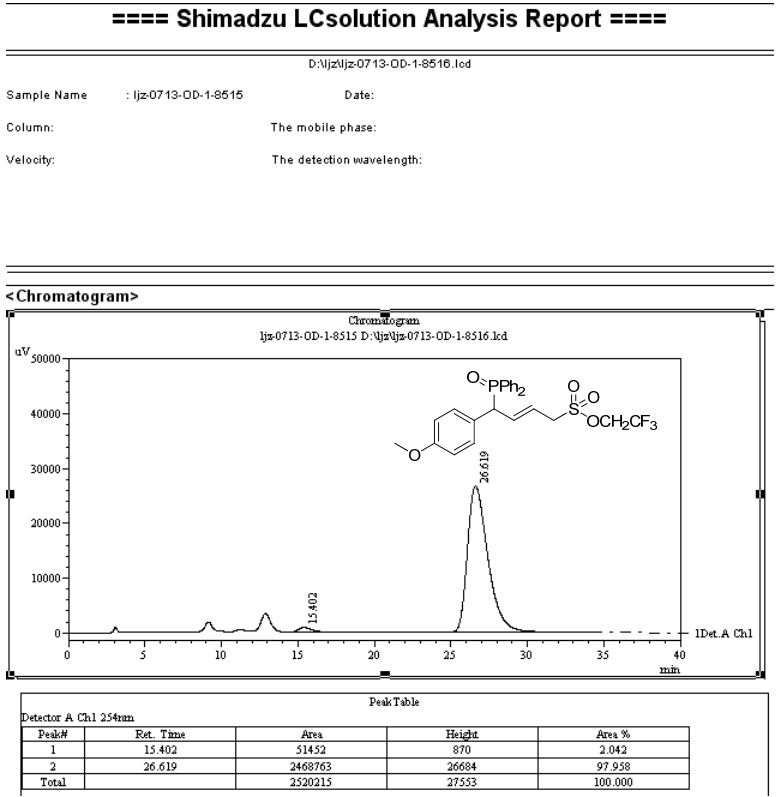

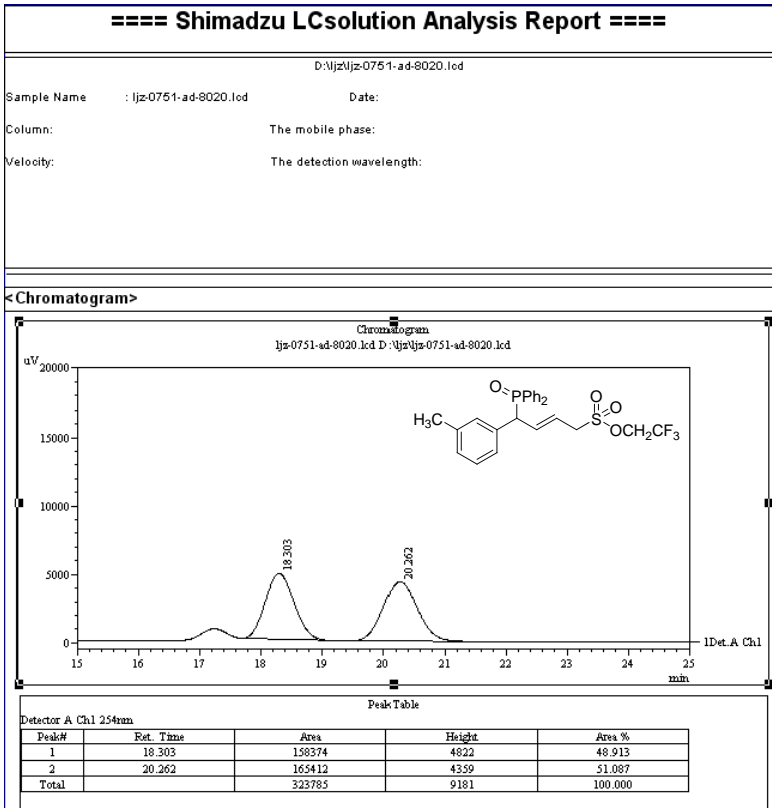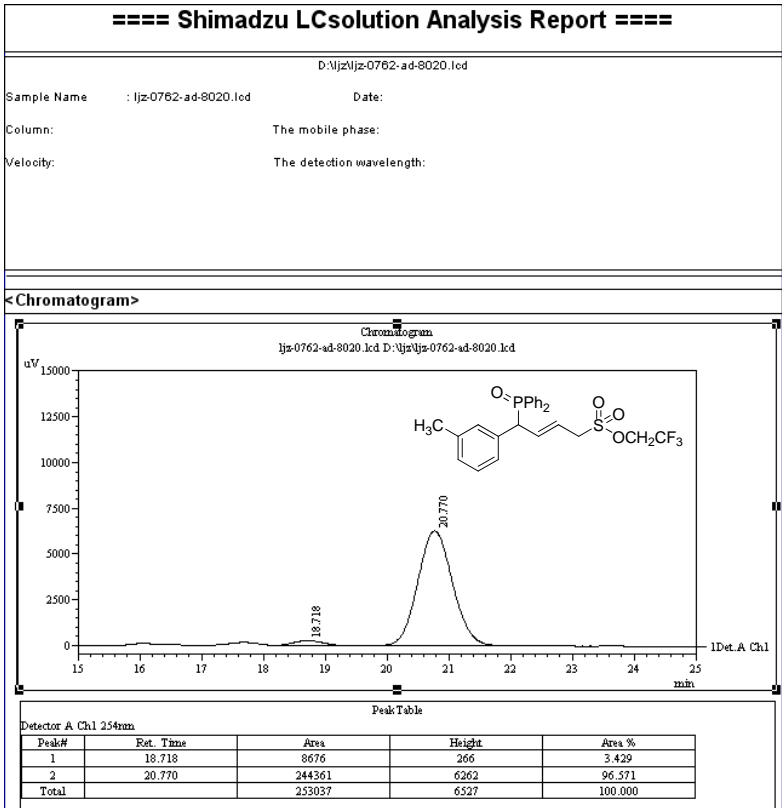

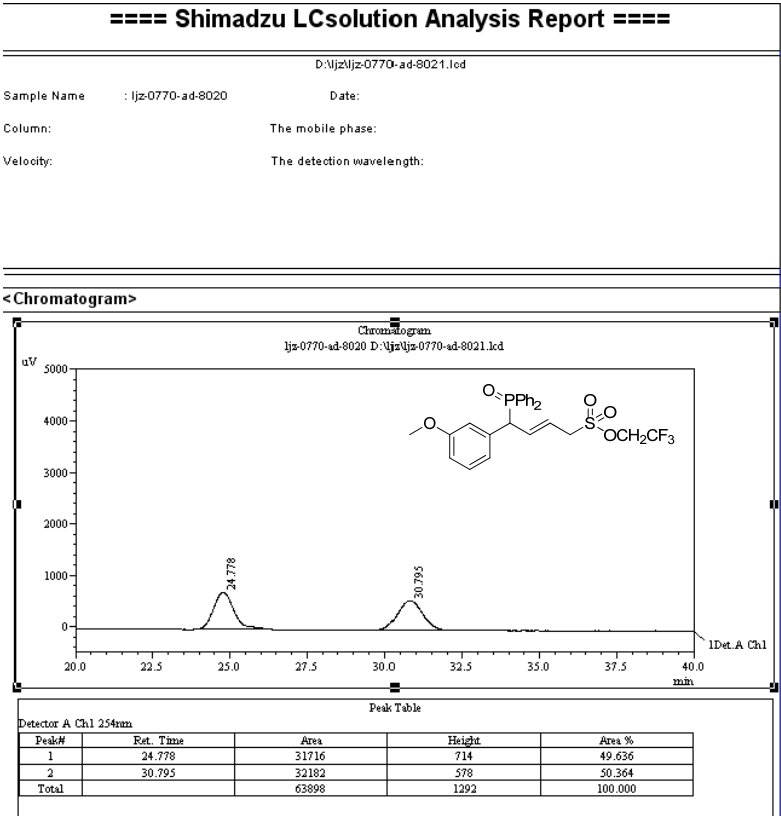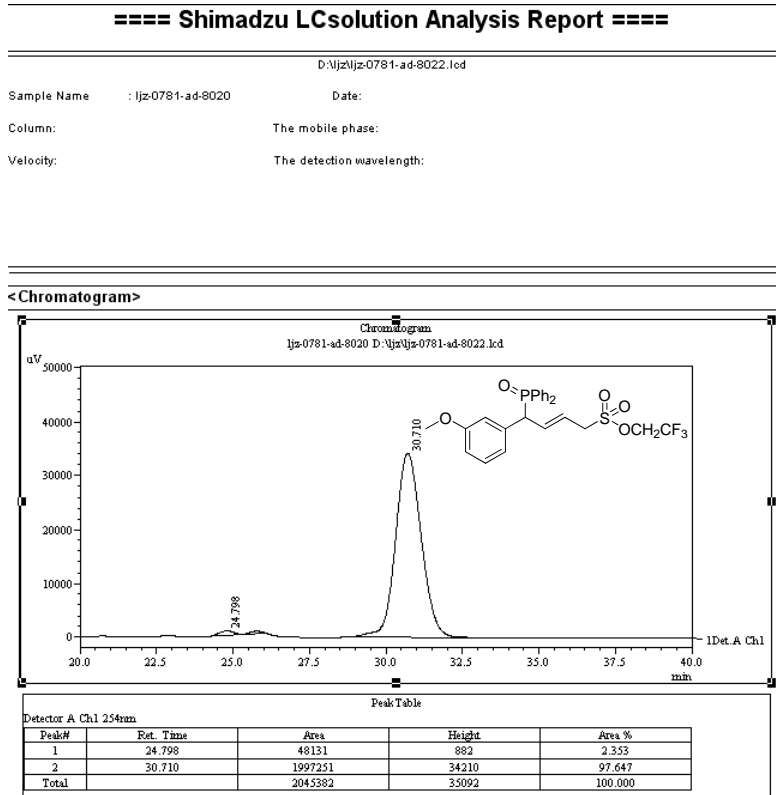

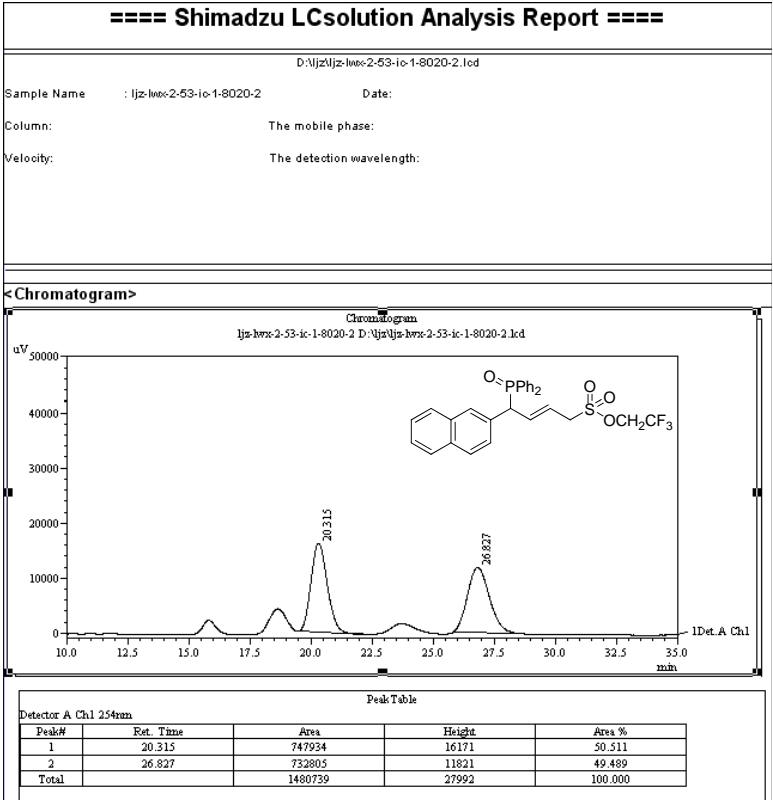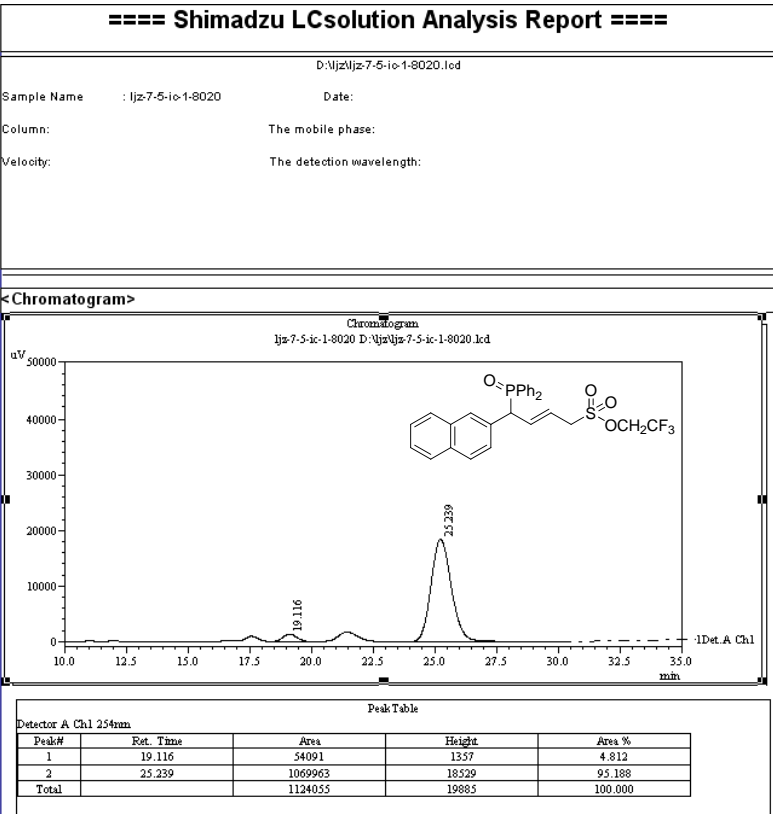

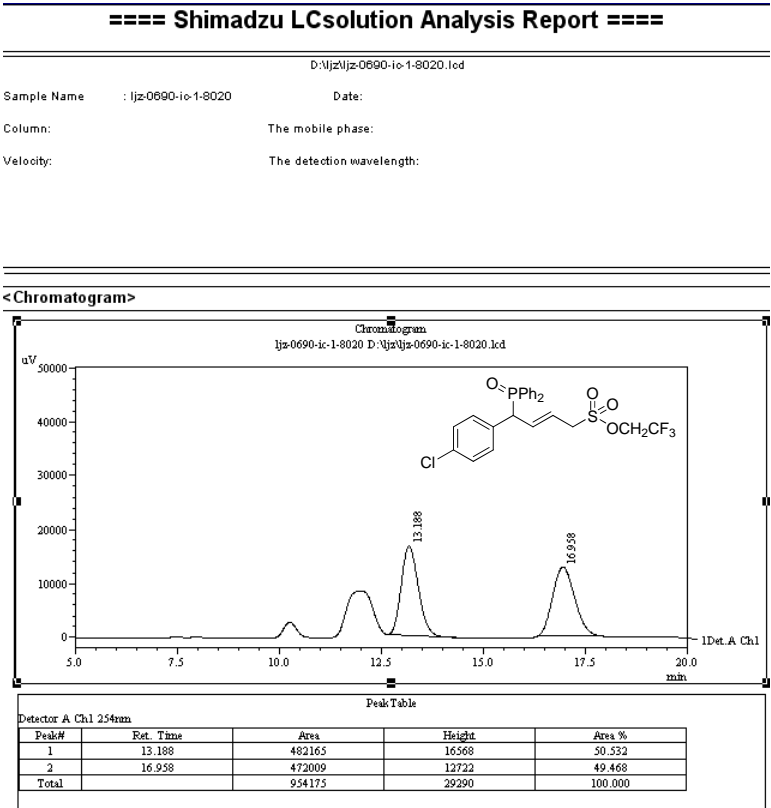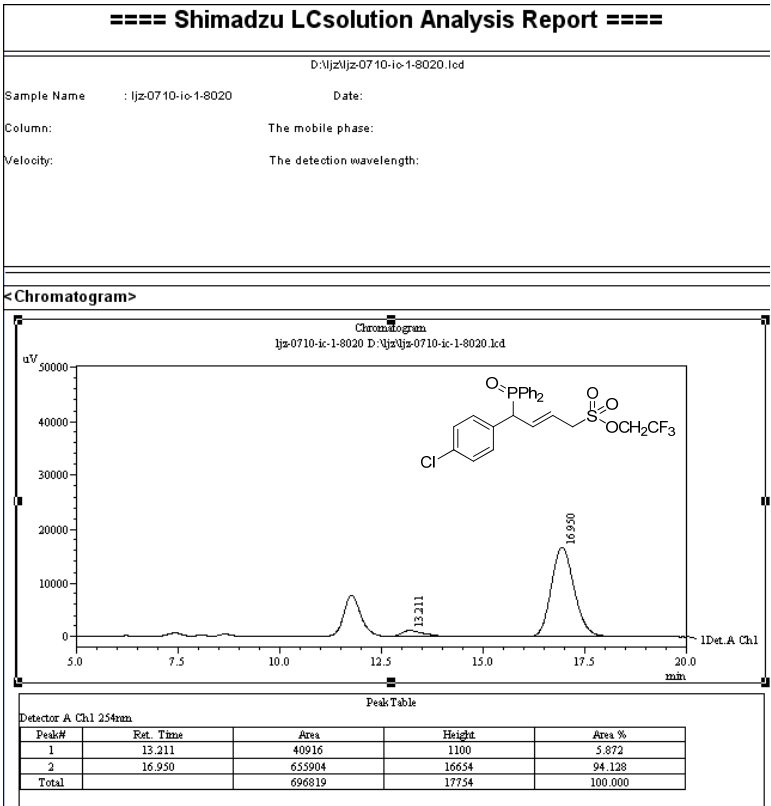

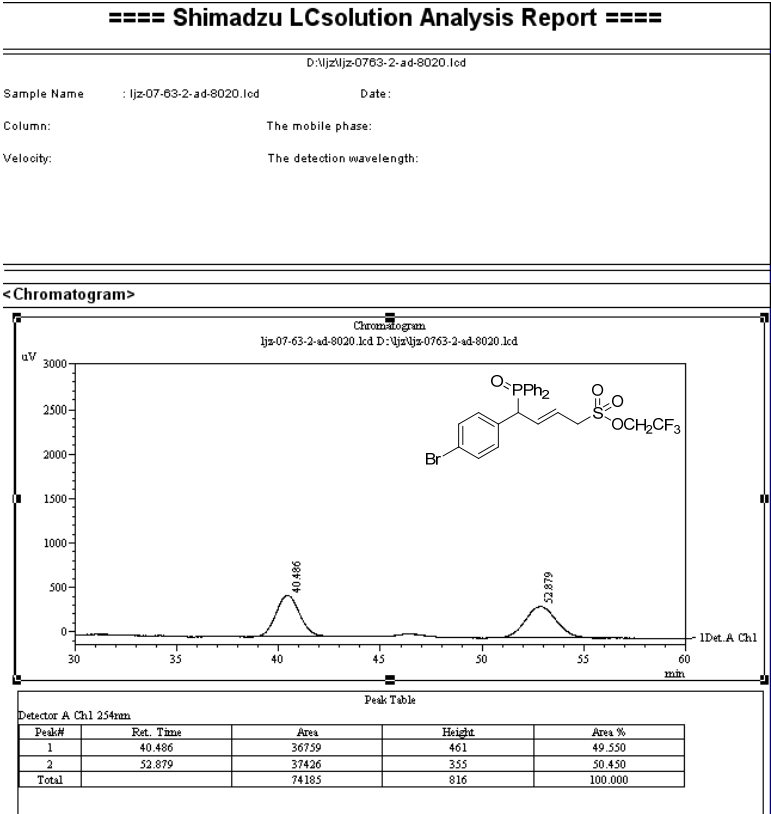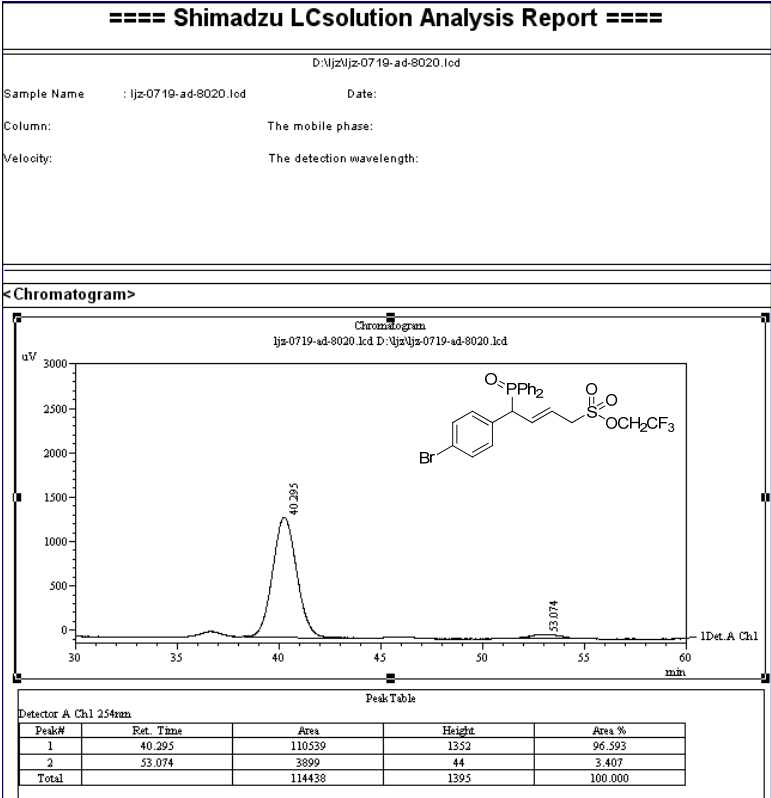

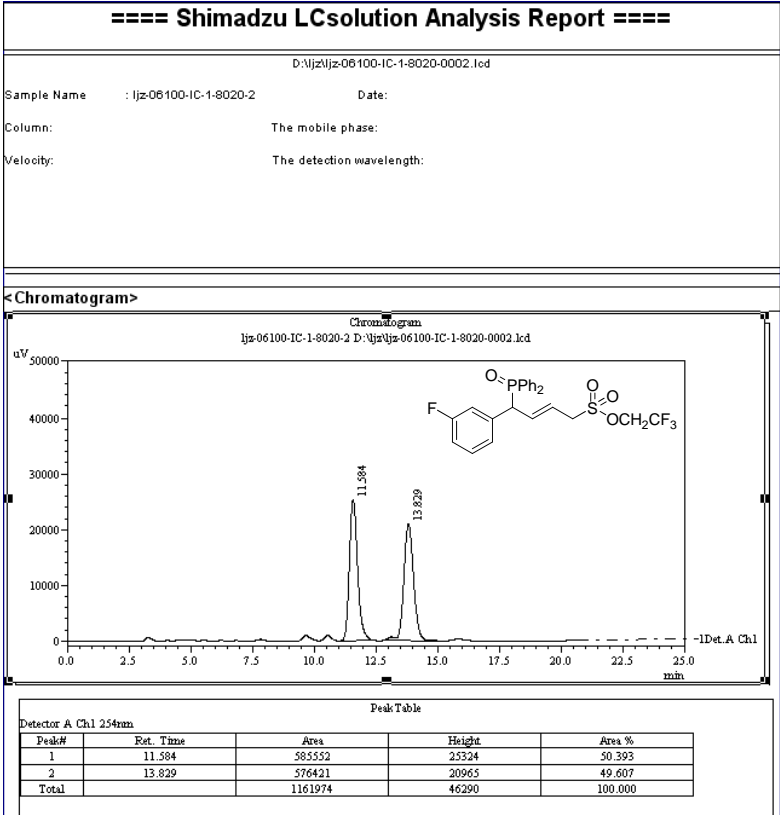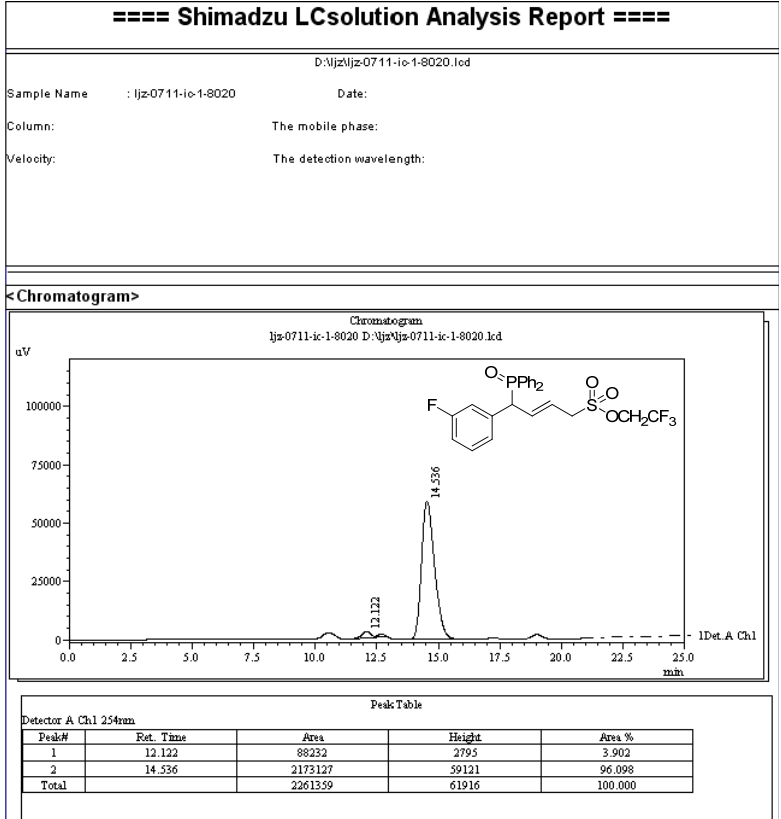

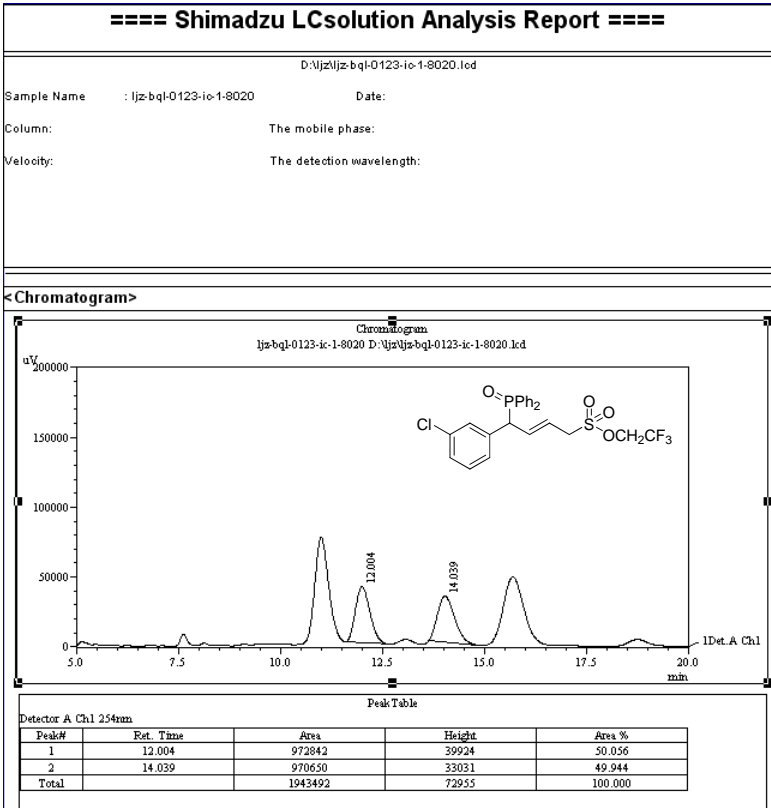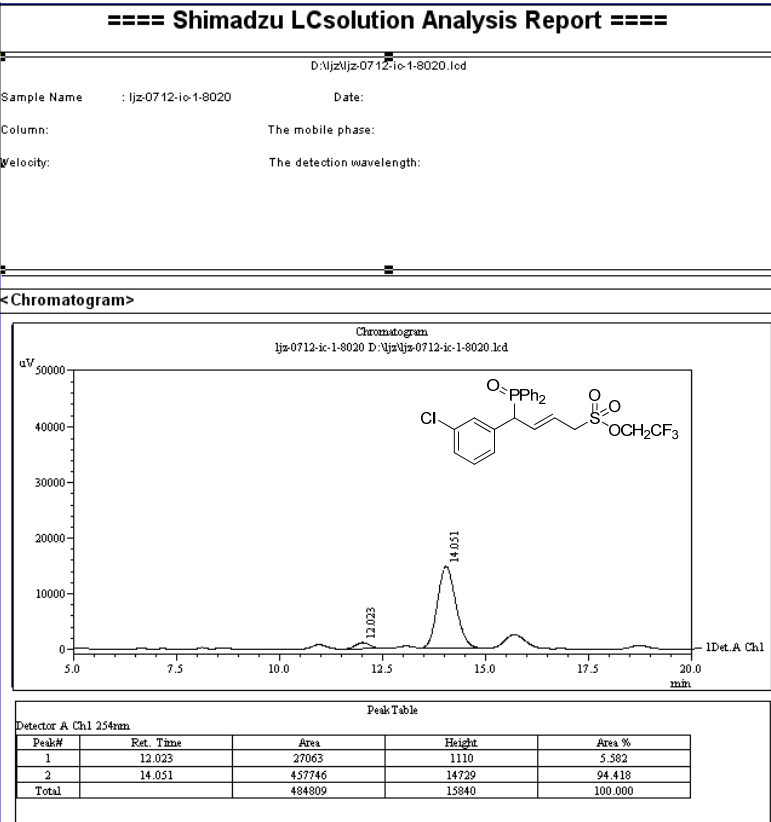

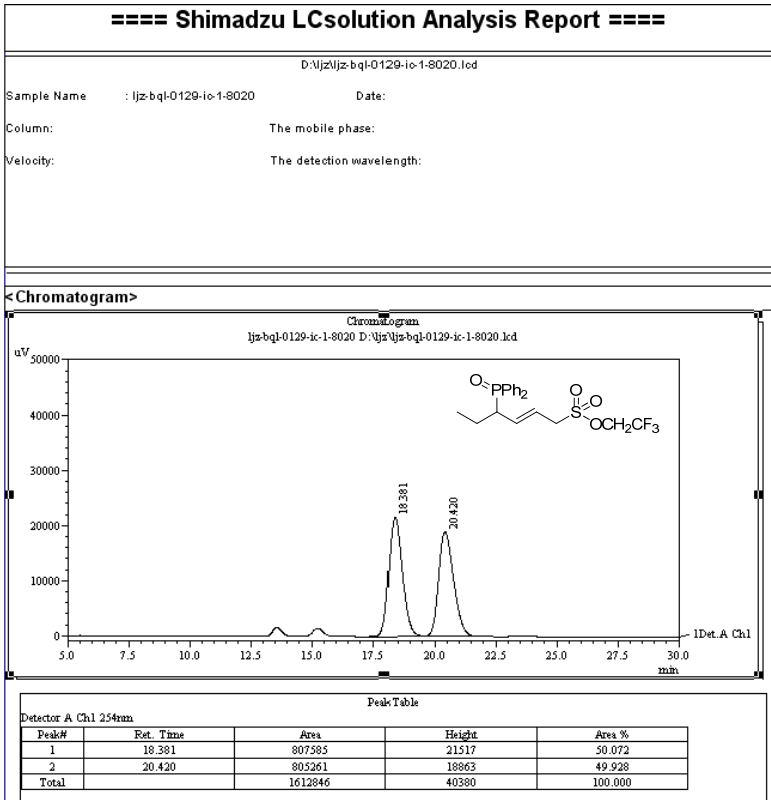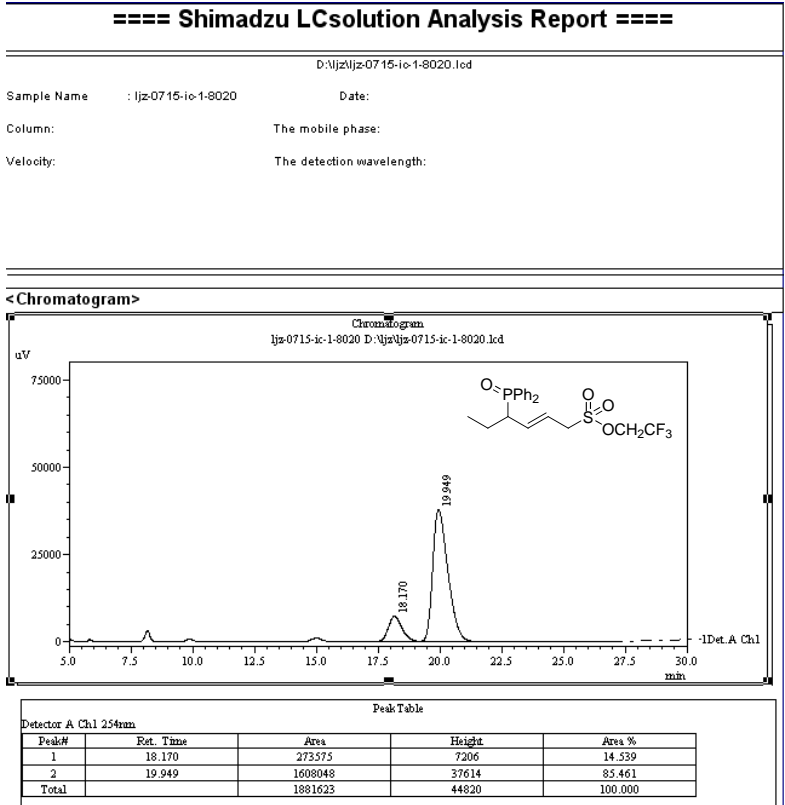

==== Shimadzu LCsolution Analysis Report ====

D:\ljz\ljz-0704-ic-8515.lcd

Sample Name : ljz-0704-ic-8515Date:

Column: The mobile phase:

Velocity: The detection wavelength:

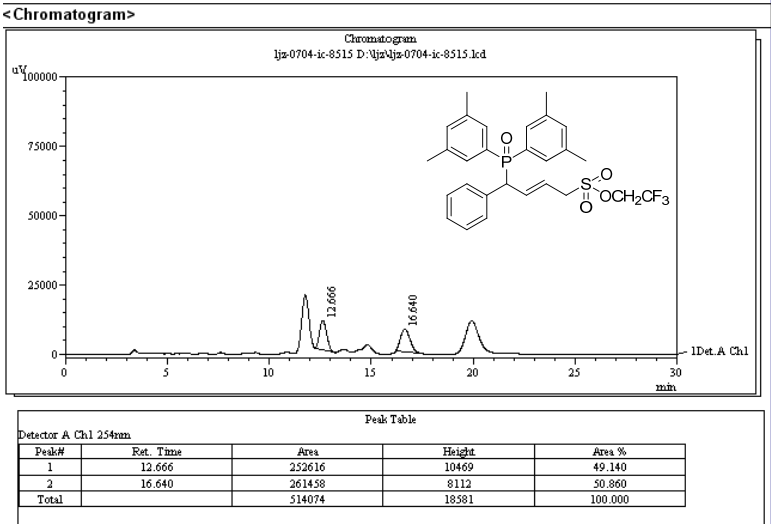

==== Shimadzu LCsolution Analysis Report ====

D:\ljz\ljz-0742-ic-8515.lcd

Sample Name : ljz-0742-ic-8515Date:

Column: The mobile phase:

Velocity: The detection wavelength:

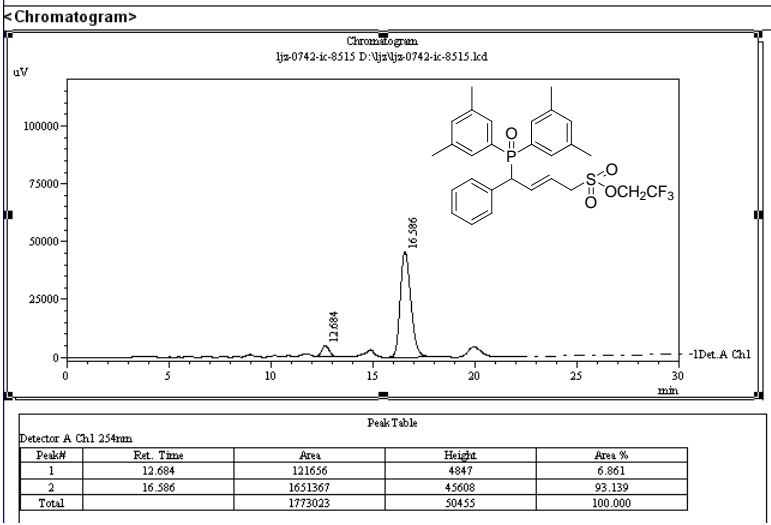

==== Shimadzu LCsolution Analysis Report ====

D:\ljz\ljz-0694-as-1-8515.lcd

Sample Name : ljz-0694-as-1-8515 Date:

Column: The mobile phase:

Velocity: The detection wavelength:

<Chromatogram>

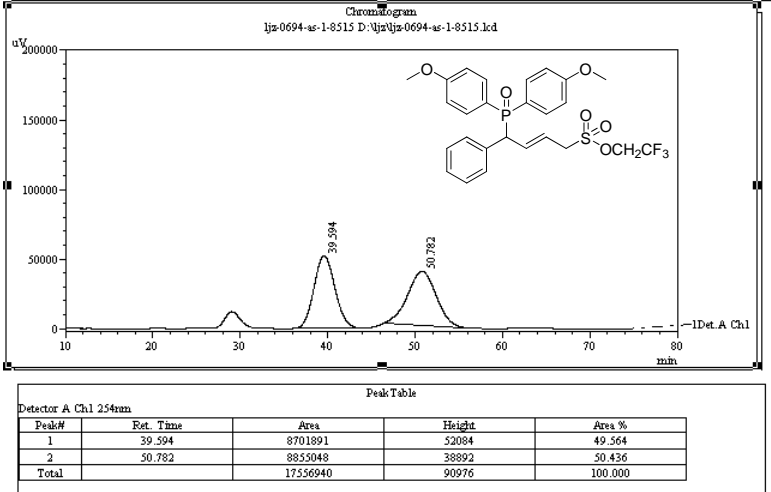

==== Shimadzu LCsolution Analysis Report ====

D:\ljz\ljz-0741-As-8515.lcd

Sample Name : ljz-0741-As-8515 Date:

Column: The mobile phase:

Velocity: The detection wavelength:

<Chromatogram>

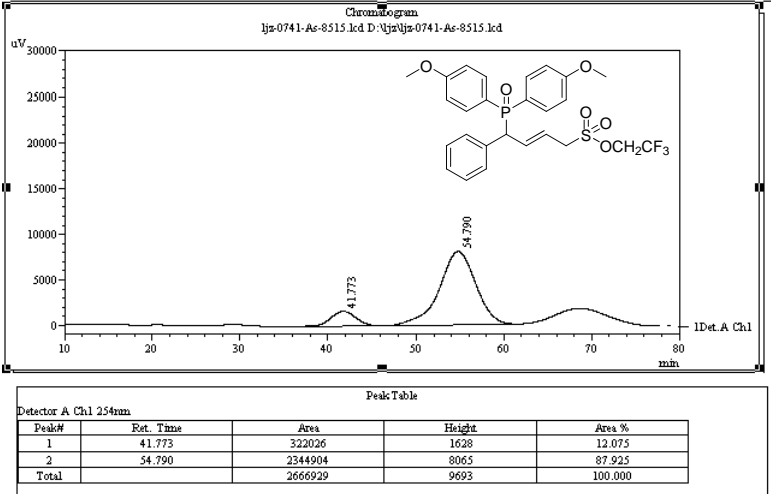

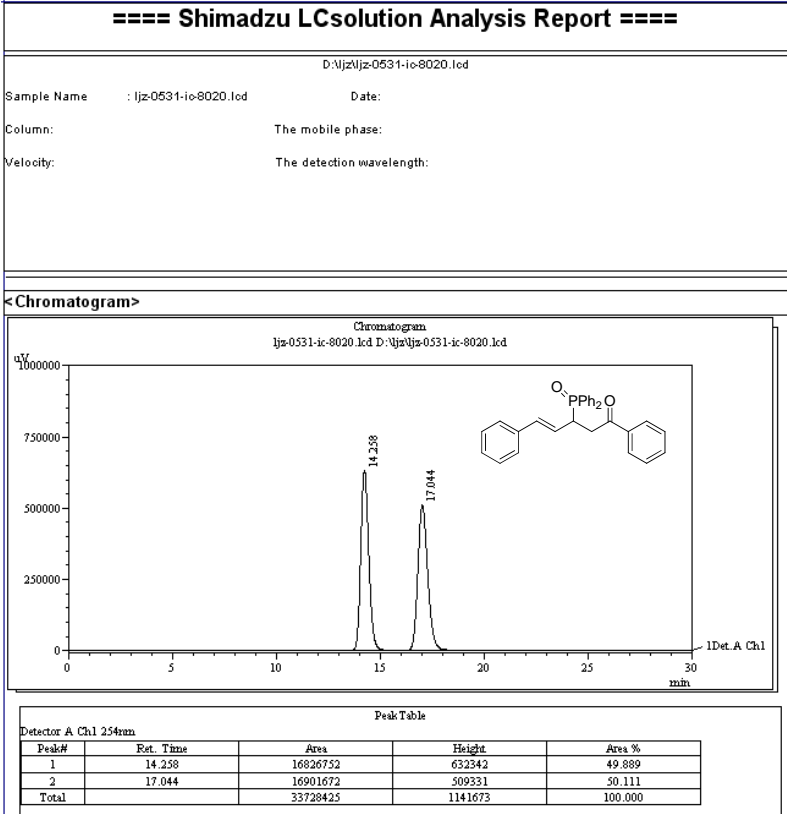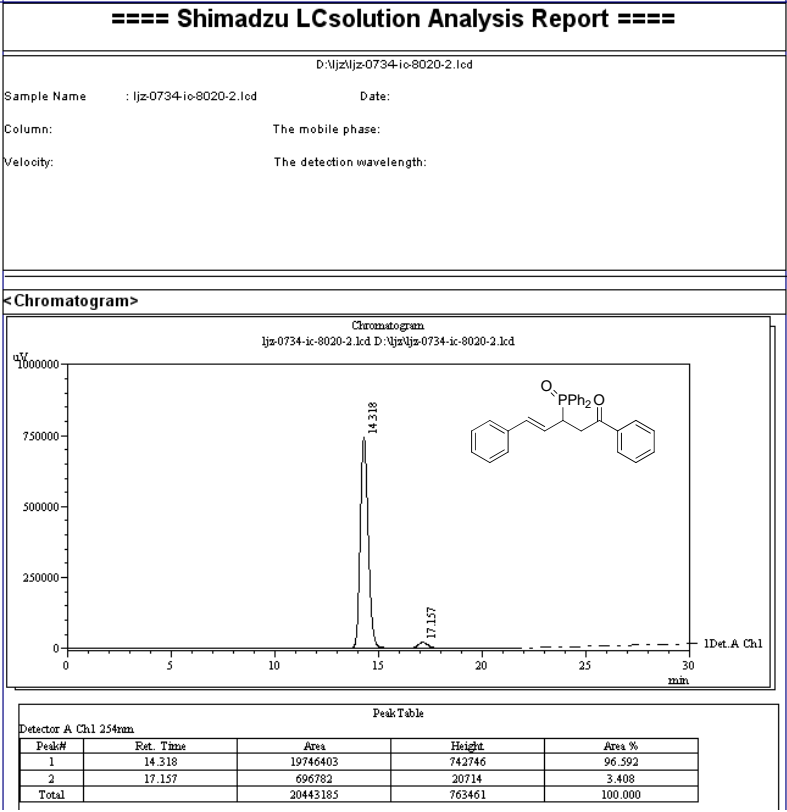

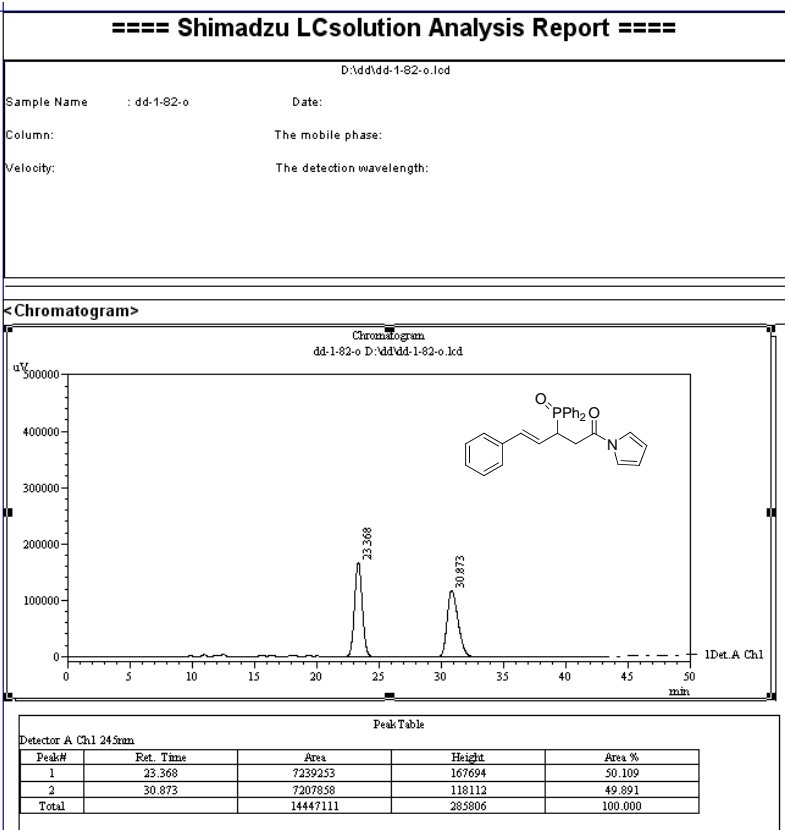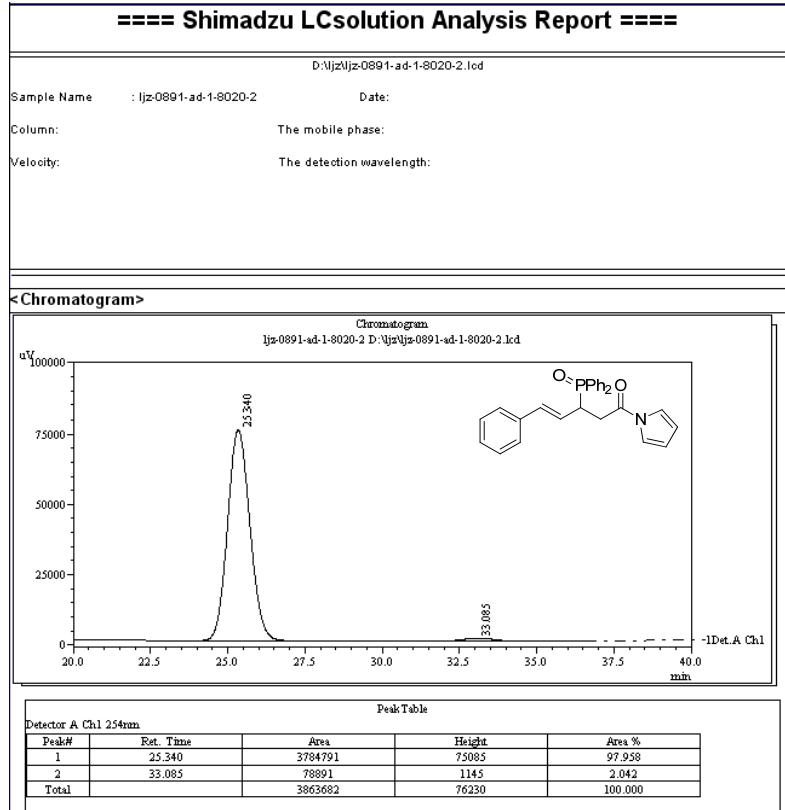

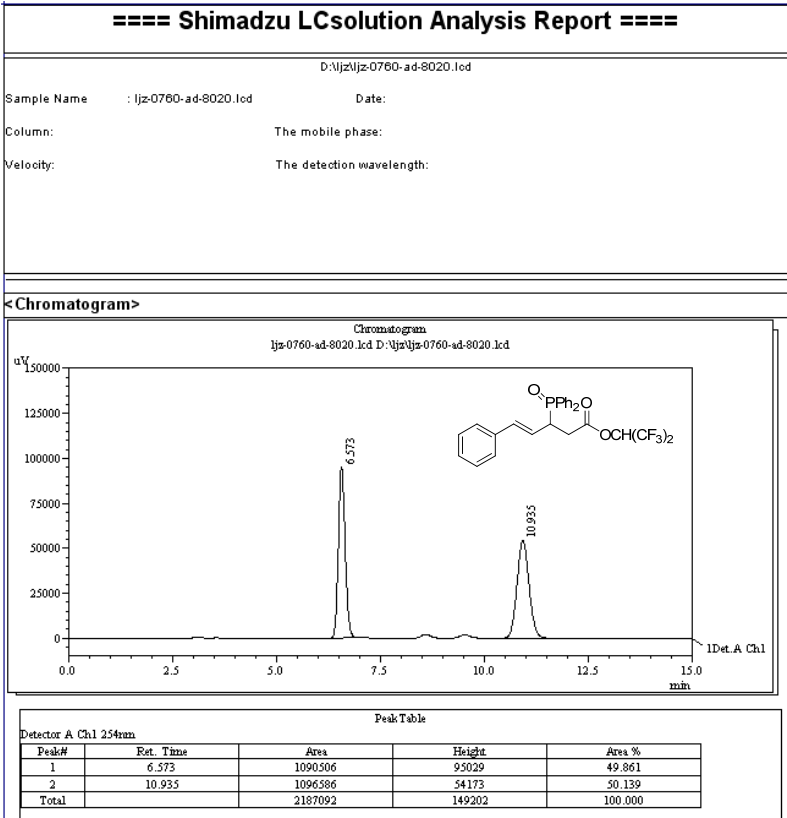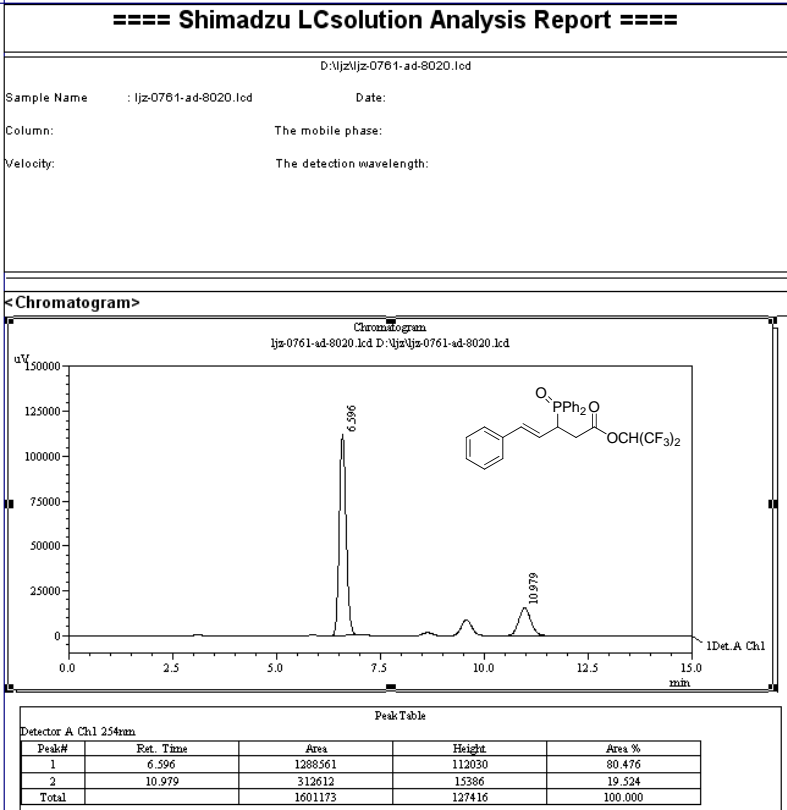

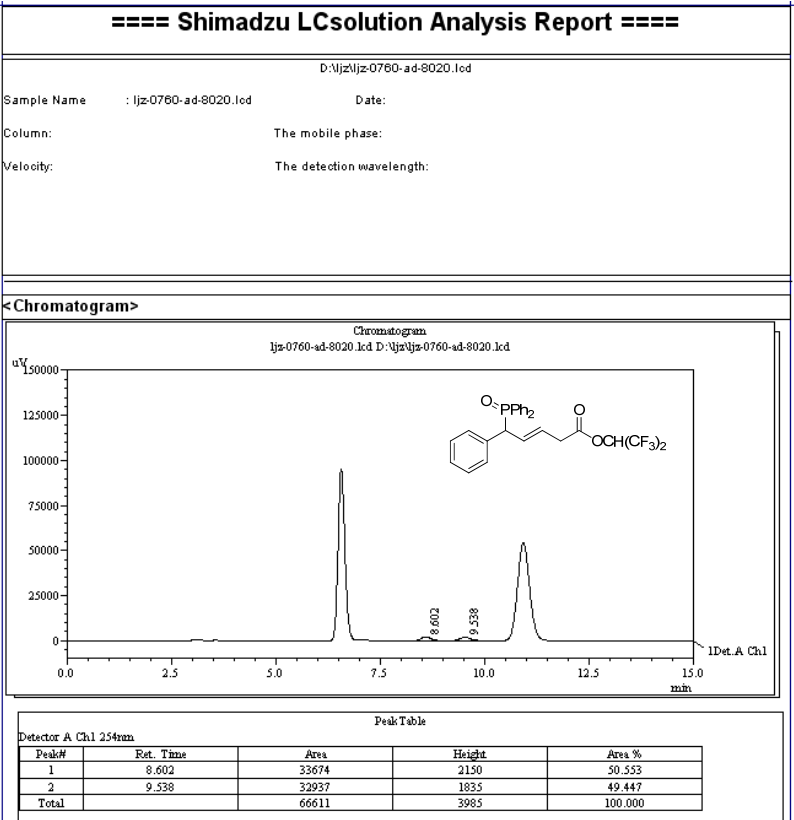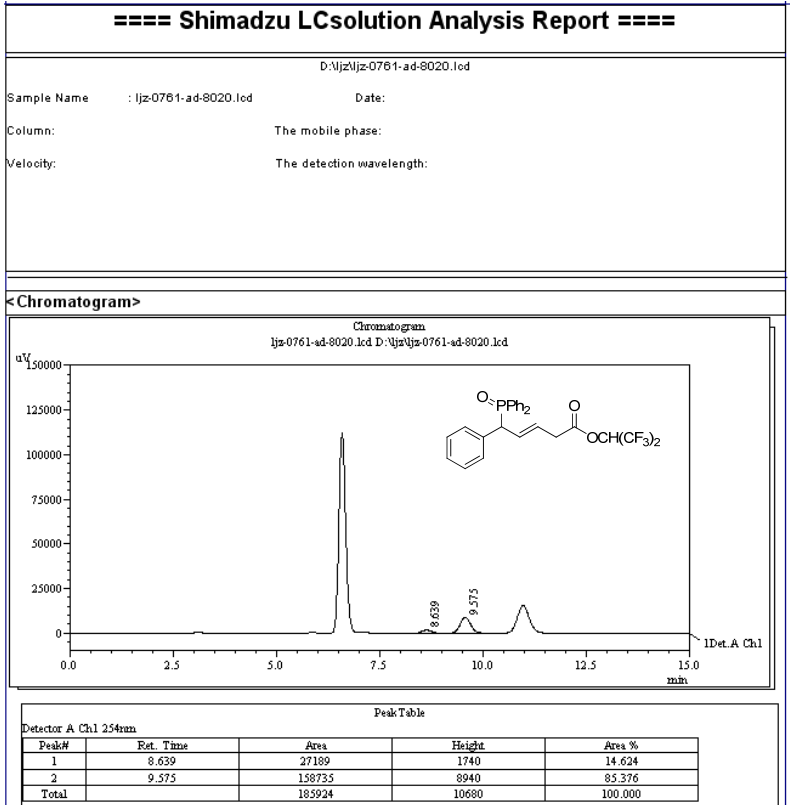

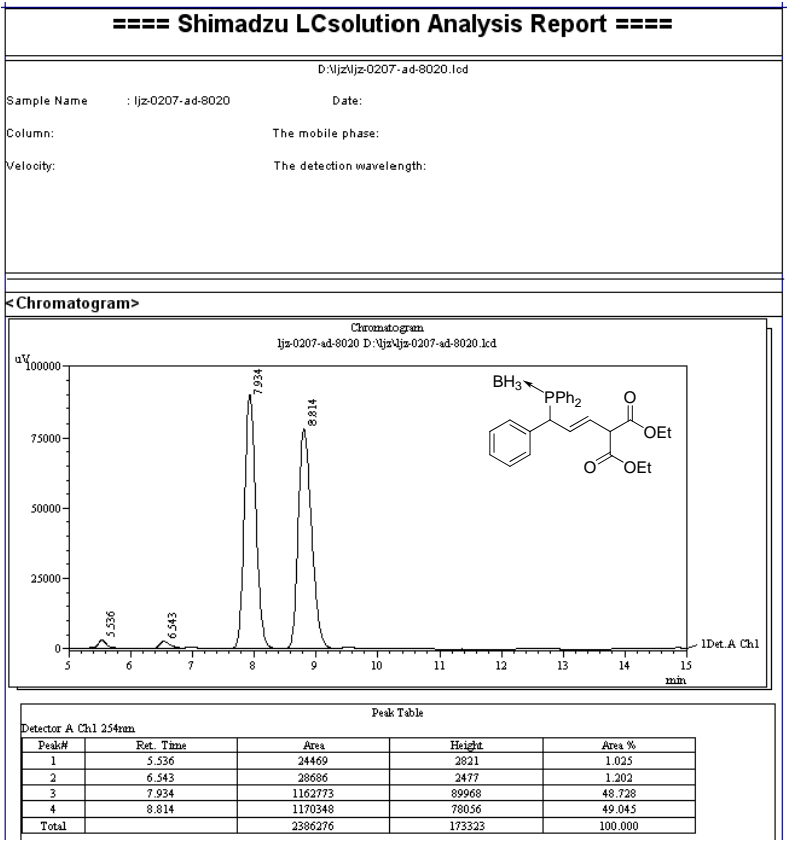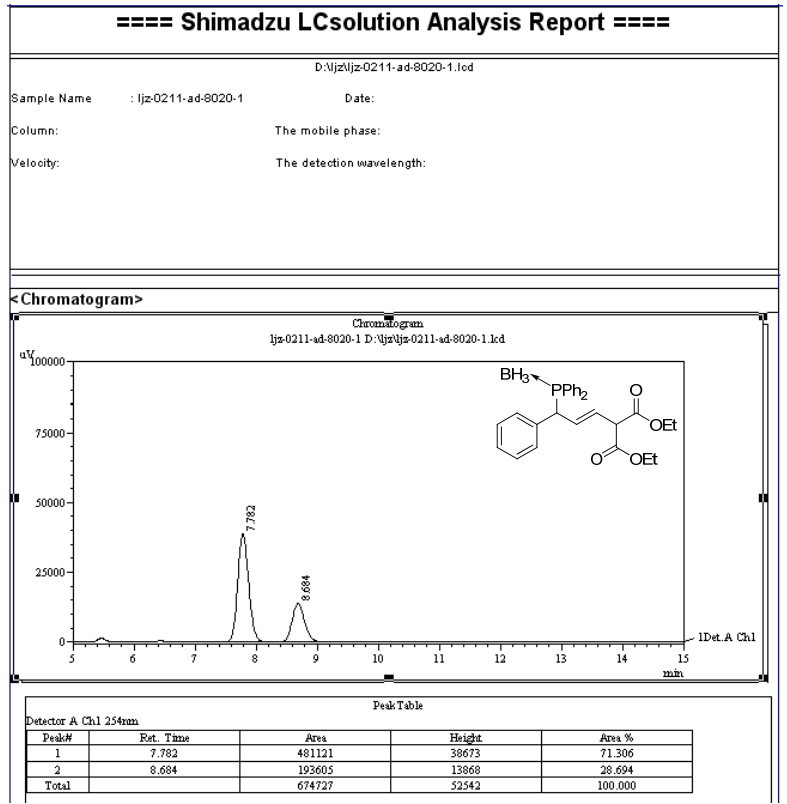

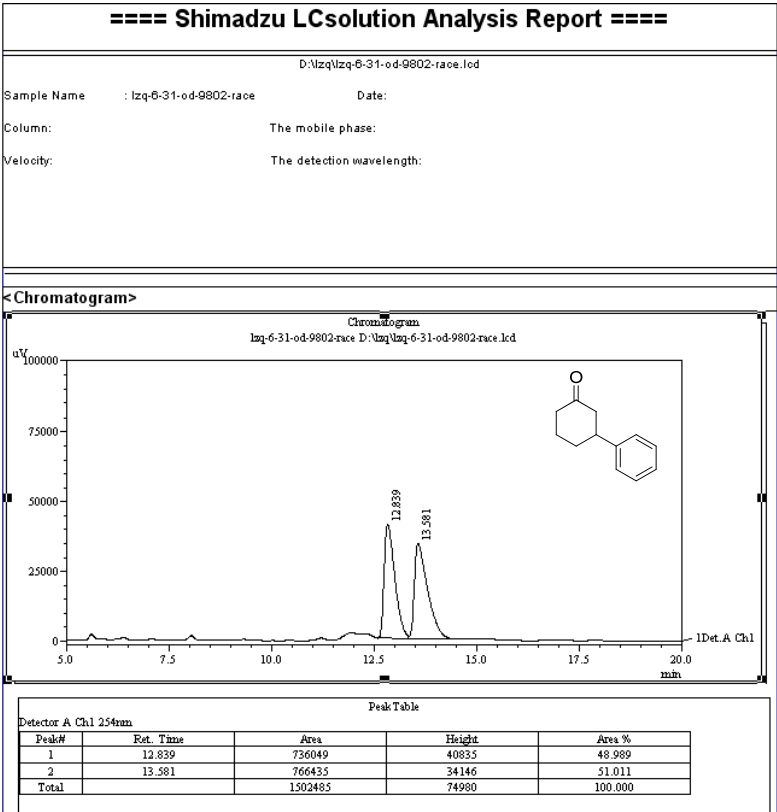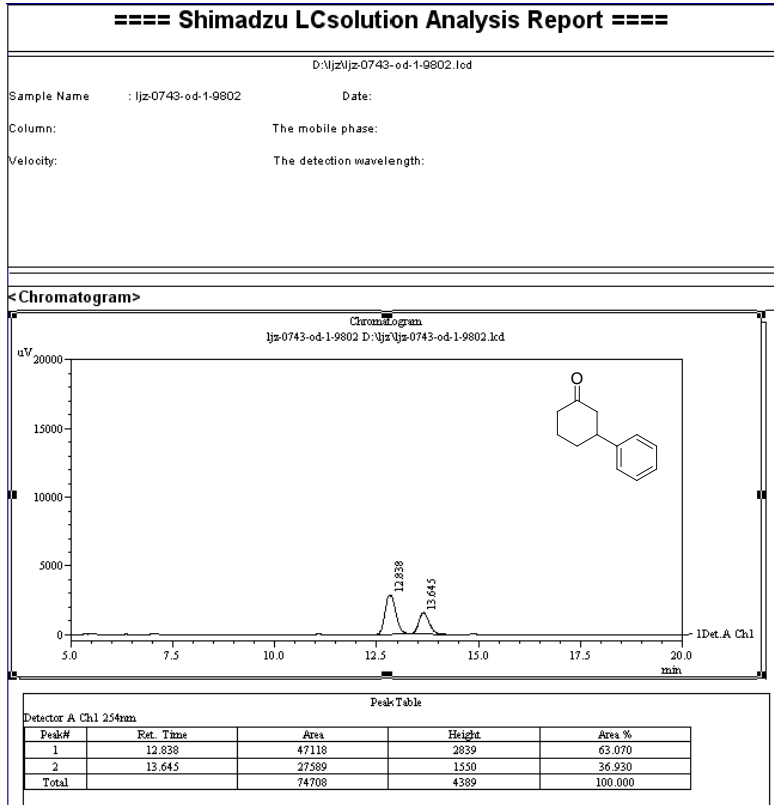

## X-ray Data

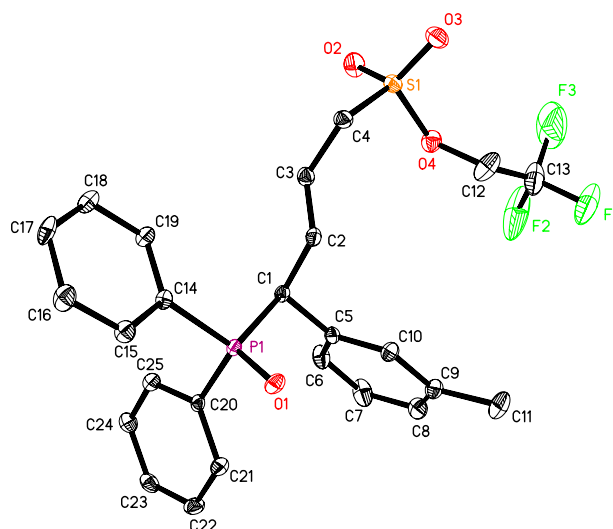

1.6-adduct in Table 2, Entry 4

Table 1. Crystal data and structure refinement for mo\_dm13397\_0m.

|                                 |                                                                   |                 |
|---------------------------------|-------------------------------------------------------------------|-----------------|
| Identification code             | mo_dm13397_0m                                                     |                 |
| Empirical formula               | C <sub>25</sub> H <sub>24</sub> F <sub>3</sub> O <sub>4</sub> P S |                 |
| Formula weight                  | 508.47                                                            |                 |
| Temperature                     | 140(2) K                                                          |                 |
| Wavelength                      | 0.71073 Å                                                         |                 |
| Crystal system                  | Monoclinic                                                        |                 |
| Space group                     | P 21                                                              |                 |
| Unit cell dimensions            | a = 5.6851(12) Å                                                  | α = 90°.        |
|                                 | b = 16.633(4) Å                                                   | β = 99.518(4)°. |
|                                 | c = 13.304(3) Å                                                   | γ = 90°.        |
| Volume                          | 1240.7(4) Å <sup>3</sup>                                          |                 |
| Z                               | 2                                                                 |                 |
| Density (calculated)            | 1.361 Mg/m <sup>3</sup>                                           |                 |
| Absorption coefficient          | 0.246 mm <sup>-1</sup>                                            |                 |
| F(000)                          | 528                                                               |                 |
| Crystal size                    | 0.390 x 0.150 x 0.100 mm <sup>3</sup>                             |                 |
| Theta range for data collection | 1.552 to 30.606°.                                                 |                 |
| Index ranges                    | -8 ≤ h ≤ 8, -23 ≤ k ≤ 23, -19 ≤ l ≤ 17                            |                 |
| Reflections collected           | 12282                                                             |                 |
| Independent reflections         | 6964 [R(int) = 0.0457]                                            |                 |
| Completeness to theta = 25.242° | 100.0 %                                                           |                 |

|                                   |                                             |
|-----------------------------------|---------------------------------------------|
| Absorption correction             | Semi-empirical from equivalents             |
| Max. and min. transmission        | 0.7461 and 0.6580                           |
| Refinement method                 | Full-matrix least-squares on F <sup>2</sup> |
| Data / restraints / parameters    | 6964 / 19 / 308                             |
| Goodness-of-fit on F <sup>2</sup> | 1.029                                       |
| Final R indices [I>2sigma(I)]     | R1 = 0.0513, wR2 = 0.1135                   |
| R indices (all data)              | R1 = 0.0691, wR2 = 0.1236                   |
| Absolute structure parameter      | -0.06(6)                                    |
| Extinction coefficient            | n/a                                         |
| Largest diff. peak and hole       | 0.455 and -0.275 e.Å                        |
